# Supplementary material for: Distinct Transcriptional Responses of Skeletal Muscle to Short-Term Cold Exposure in Tibetan Pigs and Bama Pigs
Source: MDPI journal article supplement (doi:10.3390/ijms24087431), 2023-04-18

**Figure S1.** Gene Ontology and KEGG pathway analysis of BP uniquely down-regulated DEGs.

**Figure S2.** Gene Ontology and KEGG pathway analysis of TP uniquely down-regulated DEGs.

Figure S1

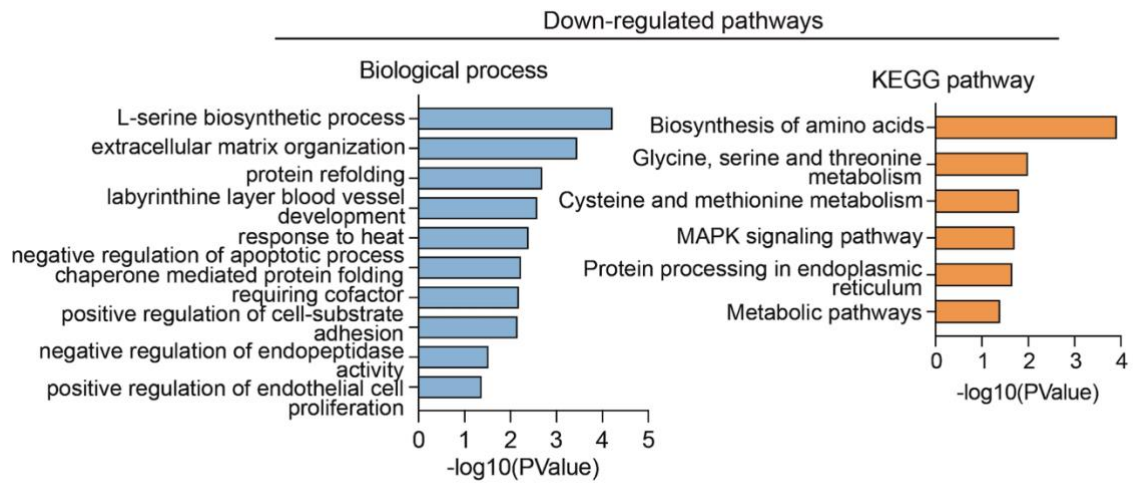

Figure S2

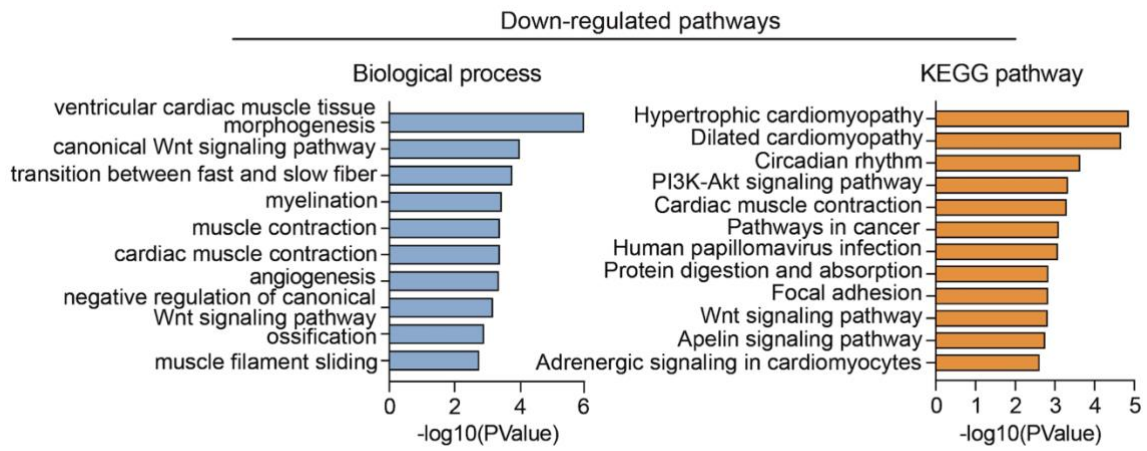

Supplement: s1 [file s1]
