# Supplementary material for: Distinct Transcriptional Responses of Skeletal Muscle to Short-Term Cold Exposure in Tibetan Pigs and Bama Pigs
Source: Int J Mol Sci. 2023 Apr 18;24(8):7431. doi: 10.3390/ijms24087431 (PMC10139196; doi:10.3390/ijms24087431)
Supplement: Supplementary file 1 [file ijms-24-07431-s001.zip › Supplementary Table S1 List of DEGs.xlsx]

## Sheet: DEGs of TP_RT vs TP_CD
Supplementary Table 2-1: DEGs of TP_RT vs TP_CD
Ensembl ID	Gene name	Description	TP_RT1	TP_RT2	TP_RT3	TP_CD1	TP_CD2	TP_CD3	logFC	logCPM	PValue
ENSSSCG00000004573	LOC100152206	nan	16	12	10	455	3375	836	7.06191	5.36651	1.29309e-23
ENSSSCG00000041810	nan	nan	2	3	9	66	329	202	5.59563	2.4366	2.66668e-17
ENSSSCG00000015334	PDK4	pyruvate dehydrogenase kinase 4 [Source:VGNC Symbol;Acc:VGNC:91280]	718	2432	4617	75173	152742	73149	5.57021	11.4096	9.95008e-27
ENSSSCG00000008809	GABRG1	gamma-aminobutyric acid type A receptor subunit gamma1 [Source:VGNC Symbol;Acc:VGNC:88311]	6	3	3	166	135	96	5.1905	1.8906	2.74255e-24
ENSSSCG00000050502	nan	nan	2	10	8	18	253	103	4.42497	1.80422	4.14032e-08
ENSSSCG00000001550	ARMC12	armadillo repeat containing 12 [Source:VGNC Symbol;Acc:VGNC:85528]	15	177	132	891	2727	1783	4.34037	5.64336	4.32701e-13
ENSSSCG00000002831	IRX3	iroquois homeobox 3 [Source:VGNC Symbol;Acc:VGNC:89217]	17	20	18	57	492	354	4.19682	3.07199	1.63448e-11
ENSSSCG00000004509	LIPG	lipase G, endothelial type [Source:VGNC Symbol;Acc:VGNC:89739]	35	37	57	504	778	729	4.16345	4.23783	1.45933e-41
ENSSSCG00000031556	nan	nan	8	2	30	266	134	112	3.93447	2.31026	1.15293e-09
ENSSSCG00000021036	RAB3B	RAB3B, member RAS onco family [Source:VGNC Symbol;Acc:VGNC:98265]	13	11	16	234	161	93	3.80361	2.24792	6.02827e-16
ENSSSCG00000002032	SLC7A8	solute carrier family 7 member 8 [Source:VGNC Symbol;Acc:VGNC:93176]	123	185	78	891	3094	644	3.74267	5.45617	2.28974e-12
ENSSSCG00000003377	ACOT7	acyl-CoA thioesterase 7 [Source:VGNC Symbol;Acc:VGNC:96893]	8	4	10	105	52	45	3.38369	1.03926	5.45814e-10
ENSSSCG00000004694	FRMD5	FERM domain containing 5 [Source:VGNC Symbol;Acc:VGNC:88238]	15	13	28	105	281	124	3.38282	2.32203	1.46593e-12
ENSSSCG00000038006	SLC25A33	solute carrier family 25 member 33 [Source:VGNC Symbol;Acc:VGNC:93009]	36	25	37	183	531	157	3.31209	3.09241	1.20019e-11
ENSSSCG00000014900	RAB30	RAB30, member RAS onco family [Source:VGNC Symbol;Acc:VGNC:98254]	42	29	137	535	1034	156	3.30387	4.08031	6.80995e-08
ENSSSCG00000040638	DIO2	iodothyronine deiodinase 2 [Source:NCBI gene (formerly Entrezgene);Acc:414379]	72	122	693	1566	3371	2098	3.30046	6.0991	2.34767e-08
ENSSSCG00000031738	COL24A1	nan	22	23	19	125	9	424	3.28693	2.46529	0.000158847
ENSSSCG00000014834	UCP3	uncoupling protein 3 [Source:NCBI gene (formerly Entrezgene);Acc:397116]	147	253	241	562	2960	1878	3.27733	5.71014	2.09817e-13
ENSSSCG00000042665	LOC110256489	nan	7	23	16	104	196	49	3.14551	1.81212	1.40849e-08
ENSSSCG00000031450	MLYCD	malonyl-CoA decarboxylase [Source:VGNC Symbol;Acc:VGNC:98129]	126	258	371	1963	2132	1293	3.09369	5.7467	3.94449e-22
ENSSSCG00000025901	LCLAT1	lysocardiolipin acyltransferase 1 [Source:VGNC Symbol;Acc:VGNC:89658]	255	319	368	800	4801	1232	3.04651	6.07186	1.48635e-09
ENSSSCG00000048448	nan	nan	5	12	19	100	58	90	3.0184	1.35266	2.74681e-11
ENSSSCG00000034358	KCNJ16	potassium inwardly rectifying channel subfamily J member 16 [Source:VGNC Symbol;Acc:VGNC:89356]	6	45	1	73	80	208	3.00837	1.87216	0.000396449
ENSSSCG00000038521	CHAC1	ChaC glutathione specific gamma-glutamylcyclotransferase 1 [Source:VGNC Symbol;Acc:VGNC:86619]	18	13	43	55	106	312	2.88771	2.2629	2.9112e-06
ENSSSCG00000044931	nan	nan	10	16	28	102	141	94	2.86418	1.7946	6.4552e-13
ENSSSCG00000014799	nan	nan	26	89	143	447	539	550	2.85174	3.96206	2.50044e-13
ENSSSCG00000004511	MYO5B	myosin VB [Source:VGNC Symbol;Acc:VGNC:103131]	11	34	24	240	99	76	2.83971	2.11304	7.06495e-08
ENSSSCG00000030278	MLLT11	MLLT11 transcription factor 7 cofactor [Source:VGNC Symbol;Acc:VGNC:96591]	117	202	584	2262	1464	1485	2.82565	5.73583	1.66575e-11
ENSSSCG00000005981	FBXO32	F-box protein 32 [Source:VGNC Symbol;Acc:VGNC:88039]	2470	1803	9804	17255	41762	21626	2.78418	9.67186	2.31439e-08
ENSSSCG00000011133	PFKFB3	6-phosphofructo-2-kinase/fructose-2,6-biphosphatase 3 [Source:VGNC Symbol;Acc:VGNC:96480]	266	210	178	379	2625	1129	2.78409	5.37714	6.90537e-08
ENSSSCG00000038600	PRSS8	serine protease 8 [Source:VGNC Symbol;Acc:VGNC:91888]	19	10	26	71	169	88	2.7518	1.76602	7.20322e-09
ENSSSCG00000007760	PRSS36	serine protease 36 [Source:HGNC Symbol;Acc:HGNC:26906]	127	9	335	900	1167	610	2.74432	4.77786	0.000142555
ENSSSCG00000010853	EPHX1	epoxide hydrolase 1 [Source:NCBI gene (formerly Entrezgene);Acc:397639]	257	376	721	3765	2472	1256	2.73558	6.27561	4.69431e-12
ENSSSCG00000012182	PCYT1B	phosphate cytidylyltransferase 1, choline, beta [Source:VGNC Symbol;Acc:VGNC:91237]	5	9	25	76	74	68	2.72457	1.20321	3.40806e-09
ENSSSCG00000038643	KLF11	Kruppel like factor 11 [Source:VGNC Symbol;Acc:VGNC:89491]	45	129	216	584	1041	443	2.68212	4.40946	1.74606e-10
ENSSSCG00000004233	SMPDL3A	sphingomyelin phosphodiesterase acid like 3A [Source:VGNC Symbol;Acc:VGNC:93265]	188	306	263	588	2570	906	2.61991	5.37881	1.10812e-09
ENSSSCG00000035863	PLIN2	perilipin 2 [Source:VGNC Symbol;Acc:VGNC:91558]	530	599	629	1981	5632	1499	2.55575	6.55732	2.38758e-10
ENSSSCG00000051428	nan	nan	884	470	904	3820	5206	2541	2.51887	6.91741	4.48662e-13
ENSSSCG00000040779	CBS	nan	15	9	26	56	162	32	2.51093	1.41661	4.53904e-05
ENSSSCG00000026597	SLC38A4	solute carrier family 38 member 4 [Source:VGNC Symbol;Acc:VGNC:93096]	1121	1127	2447	2826	13135	6376	2.46548	7.85691	1.83464e-08
ENSSSCG00000045652	nan	nan	21	26	20	88	195	44	2.46181	1.8049	3.7203e-06
ENSSSCG00000012653	ZDHHC9	zinc finger DHHC-type palmitoyltransferase 9 [Source:VGNC Symbol;Acc:VGNC:95131]	276	400	536	707	3552	1102	2.35638	5.81636	2.06228e-07
ENSSSCG00000003368	RNF207	ring finger protein 207 [Source:VGNC Symbol;Acc:VGNC:92379]	37	14	55	181	127	165	2.35244	2.35603	1.18877e-07
ENSSSCG00000010461	ANKRD1	ankyrin repeat domain 1 [Source:VGNC Symbol;Acc:VGNC:85321]	613	1358	3457	7166	10136	5053	2.33723	7.89518	5.07396e-08
ENSSSCG00000037355	RNF115	ring finger protein 115 [Source:VGNC Symbol;Acc:VGNC:92348]	480	574	716	1961	4183	1577	2.32677	6.35784	1.81452e-12
ENSSSCG00000050765	nan	nan	47	85	65	721	20	59	2.28236	3.15692	0.00924599
ENSSSCG00000003018	LIPE	lipase E, hormone sensitive type [Source:VGNC Symbol;Acc:VGNC:98493]	100	281	252	945	767	853	2.27249	4.79048	4.08717e-14
ENSSSCG00000035887	C4H8orf34	chromosome 4 C8orf34 homolog [Source:VGNC Symbol;Acc:VGNC:86034]	31	16	8	64	57	126	2.26077	1.44595	6.74946e-05
ENSSSCG00000001835	ABHD2	abhydrolase domain containing 2, acylglycerol lipase [Source:VGNC Symbol;Acc:VGNC:84980]	91	81	179	424	783	222	2.24301	3.94688	1.03551e-07
ENSSSCG00000009182	ADH1C	alcohol dehydrogenase 1C (class I), gamma polypeptide [Source:NCBI gene (formerly Entrezgene);Acc:100512615]	19	17	18	29	139	57	2.214	1.31212	7.44849e-05
ENSSSCG00000002279	GPX2	glutathione peroxidase 2 [Source:VGNC Symbol;Acc:VGNC:88653]	879	520	270	769	1461	5114	2.21272	6.2974	0.000208784
ENSSSCG00000016448	KCNH2	potassium voltage-gated channel subfamily H member 2 [Source:VGNC Symbol;Acc:VGNC:89343]	39	53	132	259	423	184	2.20499	3.23574	1.56198e-07
ENSSSCG00000000975	PANX2	pannexin 2 [Source:VGNC Symbol;Acc:VGNC:91167]	11	21	45	97	90	111	2.20331	1.72102	1.28192e-07
ENSSSCG00000022492	AMPD3	adenosine monophosphate deaminase 3 [Source:VGNC Symbol;Acc:VGNC:85288]	174	232	413	917	1862	321	2.15661	5.07541	4.65216e-06
ENSSSCG00000016792	RETREG1	reticulophagy regulator 1 [Source:VGNC Symbol;Acc:VGNC:92223]	1334	828	2137	3254	11524	1815	2.1372	7.48794	5.20851e-05
ENSSSCG00000002280	RAB15	RAB15, member RAS onco family [Source:VGNC Symbol;Acc:VGNC:98239]	21	10	36	121	69	64	2.13411	1.52019	1.21936e-05
ENSSSCG00000008368	UGP2	UDP-glucose pyrophosphorylase 2 [Source:VGNC Symbol;Acc:VGNC:98400]	7024	5961	9461	14015	40643	31989	2.12924	9.87332	3.4391e-10
ENSSSCG00000022256	DEPP1	DEPP1 autophagy regulator [Source:VGNC Symbol;Acc:VGNC:87259]	108	109	88	196	734	265	2.12301	3.70158	1.25694e-06
ENSSSCG00000009357	SMAD9	SMAD family member 9 [Source:VGNC Symbol;Acc:VGNC:93222]	15	17	25	101	63	44	2.08426	1.24965	2.92247e-06
ENSSSCG00000040746	LRP2	LDL receptor related protein 2 [Source:HGNC Symbol;Acc:HGNC:6694]	12	21	36	37	93	117	2.06667	1.47212	2.16114e-05
ENSSSCG00000023160	LOC100156657	small integral membrane protein 29 [Source:HGNC Symbol;Acc:HGNC:1340]	34	29	72	193	109	180	2.06497	2.43498	2.77654e-07
ENSSSCG00000041954	LOC100627067	nan	21	99	55	178	315	116	2.04766	2.76137	2.23092e-05
ENSSSCG00000028492	C8H4orf46	chromosome 8 C4orf46 homolog [Source:VGNC Symbol;Acc:VGNC:86081]	81	159	469	670	909	795	2.03435	4.71568	9.92129e-07
ENSSSCG00000035537	RUNX1	RUNX family transcription factor 1 [Source:VGNC Symbol;Acc:VGNC:92516]	26	52	37	98	198	109	2.02136	2.18304	2.23626e-07
ENSSSCG00000022726	RHOD	ras homolog family member D [Source:VGNC Symbol;Acc:VGNC:92287]	21	20	30	110	83	55	2.0103	1.50779	1.11029e-06
ENSSSCG00000016859	C7	complement C7 [Source:VGNC Symbol;Acc:VGNC:86067]	47	32	23	125	110	137	2.00513	2.07586	9.16445e-07
ENSSSCG00000002281	FNTB	farnesyltransferase, CAAX box, beta [Source:NCBI gene (formerly Entrezgene);Acc:100512293]	271	314	412	1112	1347	925	1.97244	5.2419	2.71384e-15
ENSSSCG00000035582	GIPC2	GIPC PDZ domain containing family member 2 [Source:VGNC Symbol;Acc:VGNC:88454]	34	41	31	34	244	88	1.94592	2.04326	0.000852509
ENSSSCG00000015893	SLC4A10	solute carrier family 4 member 10 [Source:VGNC Symbol;Acc:VGNC:95592]	19	71	260	184	671	222	1.93363	3.59053	0.00268743
ENSSSCG00000006932	CLCA4	chloride channel accessory 4 [Source:HGNC Symbol;Acc:HGNC:2018]	35	29	67	165	182	81	1.92741	2.29083	5.34178e-06
ENSSSCG00000006866	DBT	dihydrolipoamide branched chain transacylase E2 [Source:VGNC Symbol;Acc:VGNC:87169]	526	655	808	1738	3028	1767	1.92204	6.19444	3.83524e-13
ENSSSCG00000050440	LOC110257307	nan	64	152	83	30	521	435	1.91516	3.45801	0.00366646
ENSSSCG00000010456	PANK1	pantothenate kinase 1 [Source:HGNC Symbol;Acc:HGNC:8598]	217	168	336	723	1020	614	1.90996	4.73227	1.75488e-10
ENSSSCG00000051574	nan	nan	139	49	21	94	180	493	1.90176	3.11009	0.00573795
ENSSSCG00000021067	BLVRB	biliverdin reductase B [Source:VGNC Symbol;Acc:VGNC:85834]	262	291	296	1216	801	704	1.88057	4.95739	2.50108e-11
ENSSSCG00000012880	CPT1A	carnitine palmitoyltransferase 1A [Source:VGNC Symbol;Acc:VGNC:86964]	152	275	310	689	946	669	1.87575	4.70598	1.6232e-12
ENSSSCG00000037912	FITM2	fat storage inducing transmembrane protein 2 [Source:NCBI gene (formerly Entrezgene);Acc:100158013]	349	748	1160	1943	3132	1527	1.81098	6.23545	8.75433e-08
ENSSSCG00000010580	NFKB2	nuclear factor kappa B subunit 2 [Source:VGNC Symbol;Acc:VGNC:90720]	248	470	495	1266	1309	997	1.79497	5.35966	2.5411e-12
ENSSSCG00000010992	AQP7	aquaporin 7 [Source:NCBI gene (formerly Entrezgene);Acc:100126283]	74	70	193	407	411	166	1.79414	3.51048	1.95332e-05
ENSSSCG00000017213	JPT1	Jupiter microtubule associated homolog 1 [Source:VGNC Symbol;Acc:VGNC:99007]	21	21	46	62	115	84	1.78326	1.61298	1.06094e-05
ENSSSCG00000000901	FGD6	FYVE, RhoGEF and PH domain containing 6 [Source:VGNC Symbol;Acc:VGNC:88099]	84	126	164	159	602	347	1.77943	3.66272	8.08596e-06
ENSSSCG00000036724	CRYAB	crystallin alpha B [Source:VGNC Symbol;Acc:VGNC:87013]	11263	11565	15519	43466	44116	26536	1.77804	10.3608	1.89585e-11
ENSSSCG00000010211	CCDC6	coiled-coil domain containing 6 [Source:VGNC Symbol;Acc:VGNC:86304]	361	474	724	935	2773	883	1.77643	5.71135	4.06191e-06
ENSSSCG00000005047	CDKN3	cyclin dependent kinase inhibitor 3 [Source:VGNC Symbol;Acc:VGNC:86517]	88	53	109	260	288	200	1.76575	3.12038	2.77329e-07
ENSSSCG00000033112	TSPYL5	TSPY like 5 [Source:VGNC Symbol;Acc:VGNC:94520]	38	46	95	168	204	143	1.75993	2.5861	6.55821e-07
ENSSSCG00000035249	GADD45G	growth arrest and DNA damage inducible gamma [Source:VGNC Symbol;Acc:VGNC:88318]	437	1168	531	1191	2889	2135	1.75047	6.15425	1.31222e-06
ENSSSCG00000035521	KLHL38	kelch like family member 38 [Source:VGNC Symbol;Acc:VGNC:89531]	664	493	1762	2203	3700	2360	1.74115	6.57294	2.76176e-06
ENSSSCG00000047299	nan	nan	8636	8325	9570	62879	5720	6872	1.7345	9.81242	0.0093493
ENSSSCG00000011208	ZNF385D	zinc finger protein 385D [Source:VGNC Symbol;Acc:VGNC:95234]	306	221	258	469	748	1132	1.73037	4.76034	2.34898e-07
ENSSSCG00000029507	RASGEF1B	RasGEF domain family member 1B [Source:VGNC Symbol;Acc:VGNC:92109]	105	162	321	362	973	309	1.73016	4.24551	4.25289e-05
ENSSSCG00000016018	FRZB	frizzled related protein [Source:VGNC Symbol;Acc:VGNC:96308]	1025	988	787	3091	2192	2896	1.71345	6.57543	4.25254e-10
ENSSSCG00000004332	BACH2	BTB domain and CNC homolog 2 [Source:VGNC Symbol;Acc:VGNC:85742]	41	55	76	129	273	79	1.69852	2.49805	0.000121034
ENSSSCG00000002051	ABHD4	abhydrolase domain containing 4, N-acyl phospholipase B [Source:VGNC Symbol;Acc:VGNC:97859]	1236	1970	2937	4884	7156	4830	1.69833	7.61408	3.26117e-10
ENSSSCG00000023298	SRXN1	sulfiredoxin 1 [Source:VGNC Symbol;Acc:VGNC:95751]	78	112	423	780	604	207	1.68144	4.2327	0.00146719
ENSSSCG00000044399	nan	nan	17	22	44	48	61	118	1.67768	1.44177	0.00025299
ENSSSCG00000000645	GABARAPL1	GABA type A receptor associated protein like 1 [Source:VGNC Symbol;Acc:VGNC:103282]	599	822	1167	1790	3482	1816	1.67574	6.36557	7.50374e-09
ENSSSCG00000014259	ADAMTS19	ADAM metallopeptidase with thrombospondin type 1 motif 19 [Source:VGNC Symbol;Acc:VGNC:96786]	37	24	37	87	89	101	1.67344	1.7297	4.44213e-06
ENSSSCG00000045512	ECE2	EEF1A lysine methyltransferase 4 [Source:HGNC Symbol;Acc:HGNC:53611]	22	25	28	79	76	50	1.65047	1.3161	1.18023e-05
ENSSSCG00000040673	TMEM140	transmembrane protein 140 [Source:VGNC Symbol;Acc:VGNC:94088]	174	166	384	665	875	389	1.64625	4.50606	2.47824e-06
ENSSSCG00000012525	BEX1	brain expressed, X-linked 1 [Source:NCBI gene (formerly Entrezgene);Acc:100513130]	46	47	27	89	120	126	1.63654	2.00305	1.84603e-05
ENSSSCG00000012546	NRK	Nik related kinase [Source:VGNC Symbol;Acc:VGNC:98161]	311	308	267	588	846	977	1.60892	4.82998	6.03988e-09
ENSSSCG00000001549	FKBP5	FKBP prolyl isomerase 5 [Source:VGNC Symbol;Acc:VGNC:88148]	2667	4906	4795	6054	14337	12032	1.60889	8.56973	6.65057e-08
ENSSSCG00000001836	RLBP1	retinaldehyde binding protein 1 [Source:VGNC Symbol;Acc:VGNC:92327]	340	339	831	1304	1818	753	1.60018	5.52058	7.45188e-06
ENSSSCG00000013893	ARRDC2	arrestin domain containing 2 [Source:VGNC Symbol;Acc:VGNC:85545]	511	728	914	1219	1958	2441	1.59979	6.04787	3.182e-09
ENSSSCG00000015545	GLUL	glutamate-ammonia ligase [Source:NCBI gene (formerly Entrezgene);Acc:396944]	11586	20132	18743	27442	61250	42908	1.59578	10.5953	1.91034e-08
ENSSSCG00000038320	POR	P450 (cytochrome) oxidoreductase [Source:NCBI gene (formerly Entrezgene);Acc:100170114]	251	487	621	928	1992	551	1.59424	5.35703	4.4933e-05
ENSSSCG00000004454	ME1	malic enzyme 1 [Source:VGNC Symbol;Acc:VGNC:90095]	171	140	196	436	548	357	1.58664	3.99784	2.56728e-08
ENSSSCG00000031262	TXNIP	thioredoxin interacting protein [Source:VGNC Symbol;Acc:VGNC:94610]	7533	7584	14820	19948	33605	23587	1.5854	9.83158	1.73668e-08
ENSSSCG00000032605	LOC100738403	nan	35	31	67	80	148	116	1.57991	2.05016	3.74202e-05
ENSSSCG00000011195	GALNT15	polypeptide N-acetylgalactosaminyltransferase 15 [Source:VGNC Symbol;Acc:VGNC:88331]	193	300	207	289	1260	294	1.57736	4.44082	0.000769432
ENSSSCG00000016826	RAD1	RAD1 checkpoint DNA exonuclease [Source:VGNC Symbol;Acc:VGNC:92051]	95	65	130	166	336	249	1.55625	3.16641	1.13947e-05
ENSSSCG00000022945	UCHL1	ubiquitin C-terminal hydrolase L1 [Source:VGNC Symbol;Acc:VGNC:94680]	93	47	206	356	163	343	1.55166	3.38119	0.000708486
ENSSSCG00000001565	CDKN1A	cyclin dependent kinase inhibitor 1A [Source:VGNC Symbol;Acc:VGNC:86514]	1482	1269	1324	2962	4487	3208	1.54906	6.98763	4.16241e-09
ENSSSCG00000008169	TBC1D8	TBC1 domain family member 8 [Source:VGNC Symbol;Acc:VGNC:93779]	372	562	1131	1237	1946	1849	1.53724	5.90664	5.64458e-07
ENSSSCG00000014049	UNC5A	unc-5 netrin receptor A [Source:VGNC Symbol;Acc:VGNC:94707]	22	31	37	74	81	69	1.52707	1.46633	6.91037e-06
ENSSSCG00000030415	DPP3	dipeptidyl peptidase 3 [Source:VGNC Symbol;Acc:VGNC:87420]	312	328	327	780	859	807	1.52311	4.87805	1.81424e-10
ENSSSCG00000006935	CLCA2	chloride channel accessory 2 [Source:VGNC Symbol;Acc:VGNC:86723]	50	104	144	151	393	179	1.52058	3.11883	0.000168735
ENSSSCG00000001849	ANPEP	alanyl aminopeptidase, membrane [Source:VGNC Symbol;Acc:VGNC:85362]	68	218	34	246	327	224	1.51846	3.26761	0.0028841
ENSSSCG00000027013	LOC110255237	cytochrome P450 family 4 subfamily F member 8 [Source:HGNC Symbol;Acc:HGNC:2648]	1007	1175	3233	4052	5372	3412	1.50584	7.26981	1.10344e-05
ENSSSCG00000000856	PAH	phenylalanine hydroxylase [Source:VGNC Symbol;Acc:VGNC:91155]	21	110	66	231	155	74	1.49882	2.50295	0.00386728
ENSSSCG00000036883	FABP3	fatty acid binding protein 3 [Source:NCBI gene (formerly Entrezgene);Acc:399532]	3373	3115	6508	11958	10196	8956	1.48747	8.55777	7.44238e-08
ENSSSCG00000004576	RORA	RAR related orphan receptor A [Source:VGNC Symbol;Acc:VGNC:92408]	189	370	306	371	1208	511	1.48368	4.6484	7.23415e-05
ENSSSCG00000016620	TSPAN12	tetraspanin 12 [Source:VGNC Symbol;Acc:VGNC:94501]	286	242	342	984	659	477	1.48264	4.69402	1.69566e-06
ENSSSCG00000007336	NNAT	neuronatin [Source:NCBI gene (formerly Entrezgene);Acc:449004]	46	80	114	154	224	191	1.48049	2.79269	4.62593e-06
ENSSSCG00000006095	CCNE2	cyclin E2 [Source:VGNC Symbol;Acc:VGNC:86355]	38	34	34	59	140	65	1.48033	1.70162	0.000525943
ENSSSCG00000007043	GPCPD1	glycerophosphocholine phosphodiesterase 1 [Source:VGNC Symbol;Acc:VGNC:96148]	901	1037	2395	1307	3777	5146	1.47267	6.93722	0.000343894
ENSSSCG00000040056	NUDT4	nan	1365	1490	1439	2083	5388	3097	1.47251	6.98805	1.57591e-06
ENSSSCG00000039049	MAP7	microtubule associated protein 7 [Source:VGNC Symbol;Acc:VGNC:89992]	5	24	57	49	62	83	1.46689	1.27931	0.009741
ENSSSCG00000032950	SLC25A34	solute carrier family 25 member 34 [Source:VGNC Symbol;Acc:VGNC:93010]	244	393	533	980	1111	625	1.4549	5.04861	3.19621e-07
ENSSSCG00000009370	FOXO1	forkhead box O1 [Source:VGNC Symbol;Acc:VGNC:98013]	411	763	755	847	1993	1695	1.45249	5.77393	1.19629e-06
ENSSSCG00000007942	HMOX2	heme oxygenase 2 [Source:VGNC Symbol;Acc:VGNC:88912]	600	769	1097	1398	2852	1552	1.45042	6.13313	4.14517e-07
ENSSSCG00000002142	TEP1	telomerase associated protein 1 [Source:VGNC Symbol;Acc:VGNC:93877]	278	531	624	982	1166	1155	1.44418	5.32884	1.03292e-08
ENSSSCG00000039258	C5H12orf66	chromosome 5 C12orf66 homolog [Source:VGNC Symbol;Acc:VGNC:86046]	20	15	34	43	73	47	1.43993	1.04279	0.000605511
ENSSSCG00000003582	SMPDL3B	sphingomyelin phosphodiesterase acid like 3B [Source:VGNC Symbol;Acc:VGNC:93266]	82	106	178	390	264	179	1.43002	3.36645	5.78559e-05
ENSSSCG00000005456	MUSK	muscle associated receptor tyrosine kinase [Source:VGNC Symbol;Acc:VGNC:90486]	77	75	71	133	233	165	1.42234	2.70947	2.01361e-05
ENSSSCG00000011727	PTX3	pentraxin 3 [Source:VGNC Symbol;Acc:VGNC:92000]	53	26	22	90	125	35	1.41572	1.64925	0.0118761
ENSSSCG00000035908	HMGB3	nan	62	37	84	159	149	116	1.40557	2.40292	0.000136546
ENSSSCG00000008624	LPIN1	lipin 1 [Source:VGNC Symbol;Acc:VGNC:89793]	838	1680	2164	2112	4847	3432	1.39132	6.98651	8.1824e-06
ENSSSCG00000025534	CSE1L	chromosome segregation 1 like [Source:VGNC Symbol;Acc:VGNC:96039]	1758	2076	2263	3576	6208	4199	1.39087	7.41917	2.50909e-08
ENSSSCG00000015945	METTL8	methyltransferase like 8 [Source:VGNC Symbol;Acc:VGNC:96110]	57	66	73	84	170	197	1.39043	2.48144	0.000131062
ENSSSCG00000010816	TGFB2	transforming growth factor beta 2 [Source:VGNC Symbol;Acc:VGNC:95541]	318	291	378	918	794	530	1.37837	4.79817	7.62253e-07
ENSSSCG00000013637	QTRT1	queuine tRNA-ribosyltransferase catalytic subunit 1 [Source:VGNC Symbol;Acc:VGNC:92035]	49	62	63	98	191	103	1.3656	2.29257	0.00012644
ENSSSCG00000029515	PON3	paraoxonase 3 [Source:NCBI gene (formerly Entrezgene);Acc:733674]	5	37	57	62	28	117	1.36494	1.40298	0.0352791
ENSSSCG00000026533	MYF6	myogenic factor 6 [Source:VGNC Symbol;Acc:VGNC:103304]	1157	2412	3577	4995	6516	3755	1.35727	7.56081	9.95639e-06
ENSSSCG00000038663	nan	nan	78	74	16	162	96	136	1.35124	2.31598	0.0120847
ENSSSCG00000015405	CD36	CD36 molecule [Source:NCBI gene (formerly Entrezgene);Acc:733702]	10129	10786	17508	22299	34198	28116	1.35099	10.028	7.30453e-08
ENSSSCG00000013599	ANGPTL4	angiopoietin like 4 [Source:VGNC Symbol;Acc:VGNC:85306]	127	156	111	433	189	256	1.34972	3.46731	0.000180195
ENSSSCG00000022839	IFFO2	intermediate filament family orphan 2 [Source:VGNC Symbol;Acc:VGNC:98475]	34	81	79	113	207	99	1.34549	2.39343	0.000494371
ENSSSCG00000008412	PSME4	proteasome activator subunit 4 [Source:VGNC Symbol;Acc:VGNC:91928]	3035	3209	4598	5770	12845	5374	1.34508	8.20815	1.9634e-05
ENSSSCG00000032170	DAPK3	death associated protein kinase 3 [Source:VGNC Symbol;Acc:VGNC:87158]	255	463	611	596	1822	451	1.34386	5.14405	0.00150758
ENSSSCG00000038144	MYH10	nan	1368	1993	2645	4127	5480	3402	1.34384	7.33317	1.25921e-07
ENSSSCG00000012844	SLC25A22	solute carrier family 25 member 22 [Source:VGNC Symbol;Acc:VGNC:92999]	102	140	162	290	436	157	1.34186	3.46252	0.000153531
ENSSSCG00000042170	nan	nan	29	19	47	47	67	96	1.33978	1.42077	0.00185081
ENSSSCG00000022364	CPT1B	carnitine palmitoyltransferase 1B [Source:VGNC Symbol;Acc:VGNC:86965]	3634	6753	8784	12585	14378	13945	1.33973	8.98678	9.97421e-08
ENSSSCG00000027121	ODC1	ornithine decarboxylase 1 [Source:NCBI gene (formerly Entrezgene);Acc:414408]	313	427	750	918	1429	845	1.33735	5.30749	4.51657e-06
ENSSSCG00000012076	nan	nan	398	294	173	1425	356	184	1.33532	4.6456	0.0249106
ENSSSCG00000041499	nan	nan	85	108	290	443	383	182	1.33278	3.66421	0.00137489
ENSSSCG00000014112	JMY	junction mediating and regulatory protein, p53 cofactor [Source:VGNC Symbol;Acc:VGNC:89289]	33	88	113	123	262	103	1.31475	2.61756	0.00246185
ENSSSCG00000002642	CDH15	cadherin 15 [Source:VGNC Symbol;Acc:VGNC:86478]	266	413	475	727	1095	632	1.31053	4.93737	9.14785e-07
ENSSSCG00000038348	NME1	NME/NM23 nucleoside diphosphate kinase 1 [Source:VGNC Symbol;Acc:VGNC:99023]	64	87	131	176	253	167	1.30448	2.90907	3.34905e-05
ENSSSCG00000010948	CTSL	cathepsin L [Source:HGNC Symbol;Acc:HGNC:2537]	42	21	21	39	114	39	1.30131	1.30117	0.0199562
ENSSSCG00000033860	ZMAT3	zinc finger matrin-type 3 [Source:VGNC Symbol;Acc:VGNC:95177]	45	74	97	117	240	98	1.3012	2.52211	0.000906439
ENSSSCG00000034738	TRMT61A	tRNA methyltransferase 61A [Source:VGNC Symbol;Acc:VGNC:94452]	62	94	86	131	243	143	1.2976	2.70538	9.7792e-05
ENSSSCG00000011518	SHQ1	SHQ1, H/ACA ribonucleoprotein assembly factor [Source:VGNC Symbol;Acc:VGNC:92859]	72	63	84	124	187	163	1.29693	2.584	4.26243e-05
ENSSSCG00000009642	STC1	stanniocalcin 1 [Source:VGNC Symbol;Acc:VGNC:93542]	31	143	73	107	235	169	1.29072	2.68791	0.00431775
ENSSSCG00000029805	RHOBTB3	Rho related BTB domain containing 3 [Source:VGNC Symbol;Acc:VGNC:92286]	561	427	718	740	2197	757	1.29069	5.52304	0.000715768
ENSSSCG00000030378	LIMK1	LIM domain kinase 1 [Source:VGNC Symbol;Acc:VGNC:89727]	248	452	740	956	1065	919	1.2875	5.20706	6.11467e-06
ENSSSCG00000008282	WDR54	WD repeat domain 54 [Source:VGNC Symbol;Acc:VGNC:94928]	37	37	60	93	100	90	1.28688	1.86044	9.02032e-05
ENSSSCG00000004390	SESN1	sestrin 1 [Source:VGNC Symbol;Acc:VGNC:92753]	3591	3252	3605	4634	10423	7653	1.28515	8.14432	8.44267e-06
ENSSSCG00000003393	TMEM201	transmembrane protein 201 [Source:VGNC Symbol;Acc:VGNC:94131]	448	588	1144	935	2035	1536	1.28389	5.81322	4.79445e-05
ENSSSCG00000035136	SDCCAG8	SHH signaling and ciliosis regulator SDCCAG8 [Source:VGNC Symbol;Acc:VGNC:96596]	215	86	205	364	231	512	1.28347	3.80651	0.00148792
ENSSSCG00000014060	KIAA1191	KIAA1191 [Source:VGNC Symbol;Acc:VGNC:99783]	559	865	721	745	2711	1104	1.28011	5.82657	0.000577032
ENSSSCG00000015784	ACSL1	acyl-CoA synthetase long chain family member 1 [Source:VGNC Symbol;Acc:VGNC:96294]	7372	9508	15163	24080	20511	21464	1.27982	9.70011	2.16982e-07
ENSSSCG00000012136	PIR	pirin [Source:VGNC Symbol;Acc:VGNC:98196]	115	64	188	297	297	175	1.27403	3.28954	0.00095757
ENSSSCG00000033655	LOC100624785	tubulin, beta 2B class IIb [Source:NCBI gene (formerly Entrezgene);Acc:100153507]	138	198	257	399	359	468	1.27344	3.95431	1.14672e-06
ENSSSCG00000023078	WDR4	WD repeat domain 4 [Source:VGNC Symbol;Acc:VGNC:94919]	39	50	79	86	192	71	1.27294	2.15331	0.00270034
ENSSSCG00000015844	GSR	glutathione-disulfide reductase [Source:VGNC Symbol;Acc:VGNC:96337]	178	178	272	539	441	328	1.27216	4.05399	8.50704e-06
ENSSSCG00000029837	VWA8	von Willebrand factor A domain containing 8 [Source:VGNC Symbol;Acc:VGNC:94886]	528	633	857	1521	1438	1229	1.27124	5.72472	5.79299e-08
ENSSSCG00000003645	UTP11	UTP11 small subunit processome component [Source:VGNC Symbol;Acc:VGNC:94781]	548	635	602	698	2062	1036	1.26496	5.5691	0.000135211
ENSSSCG00000035037	SIK1	nan	208	1156	324	769	1952	715	1.26389	5.42877	0.0123688
ENSSSCG00000039953	PNRC1	proline rich nuclear receptor coactivator 1 [Source:VGNC Symbol;Acc:VGNC:91613]	1620	2446	3075	3659	6482	4546	1.26313	7.52587	9.92448e-07
ENSSSCG00000013349	HTATIP2	HIV-1 Tat interactive protein 2 [Source:VGNC Symbol;Acc:VGNC:88997]	509	501	957	1259	1813	973	1.25981	5.67291	1.48452e-05
ENSSSCG00000004607	PYGO1	pygopus family PHD finger 1 [Source:VGNC Symbol;Acc:VGNC:98231]	295	401	926	1015	1392	832	1.25614	5.35423	0.000136569
ENSSSCG00000001701	HSP90AB1	heat shock protein 90 alpha family class B member 1 [Source:NCBI gene (formerly Entrezgene);Acc:396742]	4118	4898	7684	11965	11965	10092	1.25337	8.74934	1.8895e-07
ENSSSCG00000014933	NAALAD2	N-acetylated alpha-linked acidic dipeptidase 2 [Source:VGNC Symbol;Acc:VGNC:90557]	110	166	83	107	188	467	1.2531	3.26601	0.00791205
ENSSSCG00000008835	RASL11B	RAS like family 11 member B [Source:VGNC Symbol;Acc:VGNC:92120]	39	51	25	50	117	78	1.25192	1.65902	0.00406723
ENSSSCG00000038602	SOGA3	nan	30	34	65	110	74	77	1.24959	1.76352	0.000920796
ENSSSCG00000013896	MPV17L2	MPV17 mitochondrial inner membrane protein like 2 [Source:VGNC Symbol;Acc:VGNC:90333]	105	153	177	260	319	309	1.24595	3.49686	1.99588e-06
ENSSSCG00000008965	BTC	betacellulin [Source:VGNC Symbol;Acc:VGNC:85910]	1289	1007	1880	2059	4352	2258	1.2443	6.76975	6.72471e-05
ENSSSCG00000005467	HSDL2	hydroxysteroid dehydrogenase like 2 [Source:VGNC Symbol;Acc:VGNC:88992]	2862	2983	4318	7121	6799	6777	1.23522	8.03752	6.64887e-08
ENSSSCG00000013643	CDKN2D	cyclin dependent kinase inhibitor 2D [Source:VGNC Symbol;Acc:VGNC:99617]	163	177	272	577	315	336	1.23082	3.98064	8.07428e-05
ENSSSCG00000016511	TTC26	tetratricopeptide repeat domain 26 [Source:VGNC Symbol;Acc:VGNC:94541]	29	36	37	54	88	67	1.22934	1.44735	0.000483549
ENSSSCG00000004725	ZNF106	zinc finger protein 106 [Source:VGNC Symbol;Acc:VGNC:95190]	8782	11697	20571	23510	37233	20701	1.22628	10.0105	2.30042e-05
ENSSSCG00000021200	HDAC8	nan	118	148	167	165	418	297	1.21813	3.48365	0.000230541
ENSSSCG00000014123	FAM151B	family with sequence similarity 151 member B [Source:VGNC Symbol;Acc:VGNC:87910]	100	95	106	189	216	211	1.21623	2.98494	1.98673e-05
ENSSSCG00000033025	C13H21orf91	chromosome 13 C21orf91 homolog [Source:VGNC Symbol;Acc:VGNC:85930]	321	383	412	448	1454	375	1.21542	4.84809	0.00288502
ENSSSCG00000003875	TTC39A	tetratricopeptide repeat domain 39A [Source:VGNC Symbol;Acc:VGNC:94551]	19	37	41	98	34	58	1.21539	1.33593	0.00866303
ENSSSCG00000038879	RELB	RELB proto-onco, NF-kB subunit [Source:VGNC Symbol;Acc:VGNC:92204]	27	79	74	154	102	93	1.21274	2.18623	0.002044
ENSSSCG00000012163	RPS6KA3	ribosomal protein S6 kinase A3 [Source:VGNC Symbol;Acc:VGNC:92442]	1510	1718	2353	1899	5979	3391	1.21097	7.15215	0.000257536
ENSSSCG00000000807	SLC38A1	nan	21	38	33	49	82	53	1.20893	1.27548	0.00130458
ENSSSCG00000012000	GBE1	1,4-alpha-glucan branching enzyme 1 [Source:VGNC Symbol;Acc:VGNC:88374]	1207	891	1423	2394	3264	1517	1.20814	6.51595	6.92132e-05
ENSSSCG00000015071	SIK3	SIK family kinase 3 [Source:VGNC Symbol;Acc:VGNC:92873]	509	671	1201	1293	2190	1166	1.2018	5.88787	5.66508e-05
ENSSSCG00000016210	ABCB6	ATP binding cassette subfamily B member 6 (Langereis blood group) [Source:HGNC Symbol;Acc:HGNC:47]	239	473	869	1002	1178	827	1.19803	5.26648	0.000194585
ENSSSCG00000017617	SCPEP1	serine carboxypeptidase 1 [Source:VGNC Symbol;Acc:VGNC:92645]	449	422	521	814	909	1081	1.19544	5.16455	8.3936e-07
ENSSSCG00000027189	PPP1R12C	protein phosphatase 1 regulatory subunit 12C [Source:VGNC Symbol;Acc:VGNC:91720]	248	572	628	681	1359	760	1.19473	5.15692	0.000141409
ENSSSCG00000015794	C15H4orf47	chromosome 15 C4orf47 homolog [Source:VGNC Symbol;Acc:VGNC:96285]	29	33	41	57	75	73	1.19247	1.4329	0.000457241
ENSSSCG00000012654	UTP14A	nan	327	479	611	719	1278	778	1.19066	5.14678	1.135e-05
ENSSSCG00000032996	nan	nan	69	66	86	129	153	157	1.18195	2.51158	8.28955e-05
ENSSSCG00000014156	ARRDC3	arrestin domain containing 3 [Source:VGNC Symbol;Acc:VGNC:85546]	753	1485	2169	2385	2668	3322	1.18149	6.74452	2.34478e-05
ENSSSCG00000051532	nan	nan	34	99	98	103	218	121	1.18129	2.5151	0.00330848
ENSSSCG00000028197	PFKL	phosphofructokinase, liver type [Source:VGNC Symbol;Acc:VGNC:91337]	424	392	793	1295	1154	667	1.18075	5.32971	0.000146645
ENSSSCG00000035619	TMEM135	transmembrane protein 135 [Source:VGNC Symbol;Acc:VGNC:94085]	145	162	189	346	371	260	1.17929	3.6586	1.2233e-05
ENSSSCG00000013400	nan	nan	96	189	151	159	398	294	1.17544	3.44848	0.00064644
ENSSSCG00000008761	TBC1D19	TBC1 domain family member 19 [Source:VGNC Symbol;Acc:VGNC:93767]	105	71	114	174	192	214	1.17544	2.91099	0.000214389
ENSSSCG00000040793	CTSD	cathepsin D [Source:NCBI gene (formerly Entrezgene);Acc:494568]	1262	2174	3834	5647	4544	3426	1.17316	7.45789	0.000142443
ENSSSCG00000025027	METTL1	methyltransferase like 1 [Source:VGNC Symbol;Acc:VGNC:90154]	64	78	145	149	274	129	1.172	2.8368	0.00169509
ENSSSCG00000027903	LOC102167481	nan	340	436	1032	1060	1376	968	1.16891	5.45219	0.00021795
ENSSSCG00000010568	NPM3	nucleophosmin/nucleoplasmin 3 [Source:VGNC Symbol;Acc:VGNC:90854]	57	45	62	98	157	71	1.16875	2.09263	0.0027124
ENSSSCG00000015267	FMO2	flavin containing dimethylaniline monoxygenase 2 [Source:VGNC Symbol;Acc:VGNC:88171]	79	79	90	76	167	250	1.16675	2.67107	0.00403561
ENSSSCG00000003914	PRDX1	peroxiredoxin 1 [Source:VGNC Symbol;Acc:VGNC:98542]	1147	753	1120	2324	2242	1439	1.16073	6.27893	7.20553e-05
ENSSSCG00000016929	PDE4D	phosphodiesterase 4D [Source:VGNC Symbol;Acc:VGNC:91256]	881	1355	1766	1788	3191	2669	1.15971	6.6153	8.57639e-06
ENSSSCG00000037499	NEDD4	NEDD4 E3 ubiquitin protein ligase [Source:VGNC Symbol;Acc:VGNC:90666]	616	894	1380	981	2063	2465	1.15837	6.13905	0.000234866
ENSSSCG00000006865	RTCA	RNA 3'-terminal phosphate cyclase [Source:VGNC Symbol;Acc:VGNC:92491]	313	287	456	654	767	627	1.15723	4.72571	3.90785e-06
ENSSSCG00000013336	CCDC34	coiled-coil domain containing 34 [Source:VGNC Symbol;Acc:VGNC:86294]	29	26	47	78	58	60	1.15365	1.3896	0.00193016
ENSSSCG00000012639	THOC2	THO complex 2 [Source:VGNC Symbol;Acc:VGNC:93957]	743	949	1057	802	2591	1953	1.15249	6.09425	0.000473052
ENSSSCG00000006277	SPIDR	scaffold protein involved in DNA repair [Source:VGNC Symbol;Acc:VGNC:93406]	55	96	116	98	206	204	1.15102	2.72029	0.00122926
ENSSSCG00000038950	VARS1	valyl-tRNA synthetase 1 [Source:VGNC Symbol;Acc:VGNC:94800]	578	854	1156	1450	1988	1465	1.15099	5.98213	2.45726e-06
ENSSSCG00000014016	SQSTM1	sequestosome 1 [Source:VGNC Symbol;Acc:VGNC:93445]	4341	5509	8203	11282	14808	8152	1.14961	8.78746	1.68719e-05
ENSSSCG00000046669	nan	nan	45	44	40	101	63	88	1.14899	1.74462	0.0017522
ENSSSCG00000023630	CPM	carboxypeptidase M [Source:VGNC Symbol;Acc:VGNC:86947]	74	137	166	170	368	174	1.14805	3.20503	0.00138002
ENSSSCG00000030165	MAFF	MAF bZIP transcription factor F [Source:VGNC Symbol;Acc:VGNC:89947]	109	311	340	201	968	250	1.1467	4.18499	0.0209692
ENSSSCG00000020808	CCT6A	nan	1833	1487	2635	3694	4757	3037	1.14569	7.21318	1.91664e-05
ENSSSCG00000039867	UCK2	uridine-cytidine kinase 2 [Source:VGNC Symbol;Acc:VGNC:98399]	141	230	388	368	733	315	1.14451	4.19299	0.00117217
ENSSSCG00000036742	KLF15	Kruppel like factor 15 [Source:VGNC Symbol;Acc:VGNC:89495]	333	702	690	994	1467	774	1.14415	5.38566	7.00531e-05
ENSSSCG00000004314	PM20D2	peptidase M20 domain containing 2 [Source:VGNC Symbol;Acc:VGNC:91586]	348	454	611	620	1349	725	1.14356	5.11607	0.000106637
ENSSSCG00000007554	ZFAND2A	zinc finger AN1-type containing 2A [Source:VGNC Symbol;Acc:VGNC:95134]	121	209	247	295	583	208	1.14056	3.81417	0.00146171
ENSSSCG00000010530	CRTAC1	cartilage acidic protein 1 [Source:VGNC Symbol;Acc:VGNC:87004]	80	62	92	110	150	196	1.14052	2.57484	0.000843303
ENSSSCG00000005941	KHDRBS3	KH RNA binding domain containing, signal transduction associated 3 [Source:VGNC Symbol;Acc:VGNC:89424]	100	56	55	87	163	178	1.1378	2.48191	0.0077101
ENSSSCG00000010814	ESRRG	estrogen related receptor gamma [Source:VGNC Symbol;Acc:VGNC:96289]	275	351	476	779	937	361	1.13722	4.75542	0.000439313
ENSSSCG00000004601	MNS1	meiosis specific nuclear structural 1 [Source:VGNC Symbol;Acc:VGNC:90288]	30	22	65	50	62	109	1.13467	1.55301	0.0132744
ENSSSCG00000022635	BEX4	brain expressed X-linked 4 [Source:HGNC Symbol;Acc:HGNC:25475]	64	74	53	103	130	138	1.13257	2.28709	0.000638311
ENSSSCG00000037413	KBTBD7	kelch repeat and BTB domain containing 7 [Source:VGNC Symbol;Acc:VGNC:89320]	51	80	121	209	160	96	1.1315	2.61901	0.00269555
ENSSSCG00000022404	SLC3A2	solute carrier family 3 member 2 [Source:VGNC Symbol;Acc:VGNC:93112]	857	2190	1228	1928	3581	2515	1.12752	6.69473	0.000254244
ENSSSCG00000003973	CTPS1	CTP synthase 1 [Source:VGNC Symbol;Acc:VGNC:87070]	96	119	172	207	299	221	1.12585	3.24613	9.25338e-05
ENSSSCG00000039651	SLC2A5	solute carrier family 2 member 5 [Source:VGNC Symbol;Acc:VGNC:93050]	168	267	406	403	633	513	1.11849	4.33103	6.64224e-05
ENSSSCG00000006214	RRS1	ribosome biosis regulator 1 homolog [Source:VGNC Symbol;Acc:VGNC:92469]	226	253	432	376	893	429	1.11284	4.46093	0.000823557
ENSSSCG00000040918	LTV1	nan	318	341	476	437	976	727	1.11177	4.79341	0.000120021
ENSSSCG00000010564	POLL	DNA polymerase lambda [Source:VGNC Symbol;Acc:VGNC:91638]	103	127	204	246	285	271	1.11039	3.39347	7.10036e-05
ENSSSCG00000041409	MFSD4B	major facilitator superfamily domain containing 4B [Source:HGNC Symbol;Acc:HGNC:21053]	115	328	217	269	578	366	1.1078	3.97997	0.00142824
ENSSSCG00000011913	CCDC191	coiled-coil domain containing 191 [Source:VGNC Symbol;Acc:VGNC:86284]	82	84	136	151	216	196	1.10608	2.88659	0.000253408
ENSSSCG00000022099	TP53INP2	tumor protein p53 inducible nuclear protein 2 [Source:VGNC Symbol;Acc:VGNC:95737]	1148	3133	4796	4432	7790	3918	1.10539	7.71167	0.00235146
ENSSSCG00000005004	LRR1	leucine rich repeat protein 1 [Source:VGNC Symbol;Acc:VGNC:98076]	36	40	45	40	146	43	1.10177	1.60622	0.0294498
ENSSSCG00000023391	LONP2	lon peptidase 2, peroxisomal [Source:VGNC Symbol;Acc:VGNC:89776]	776	952	1488	1779	2302	1826	1.10148	6.26678	5.49849e-06
ENSSSCG00000012843	PIDD1	p53-induced death domain protein 1 [Source:VGNC Symbol;Acc:VGNC:98192]	33	73	111	105	198	87	1.09943	2.36542	0.00904313
ENSSSCG00000005453	TXN	thioredoxin [Source:NCBI gene (formerly Entrezgene);Acc:397581]	981	646	857	1262	1497	2026	1.09829	5.96246	0.00011939
ENSSSCG00000016518	TRIM24	tripartite motif containing 24 [Source:VGNC Symbol;Acc:VGNC:94400]	487	764	918	749	1807	1432	1.09638	5.69294	0.00020061
ENSSSCG00000011366	SLC25A20	solute carrier family 25 member 20 [Source:VGNC Symbol;Acc:VGNC:92998]	668	676	907	1203	1502	1490	1.09465	5.77523	1.97662e-06
ENSSSCG00000008121	GPAT2	nan	25	16	44	57	68	32	1.0941	1.09663	0.0171094
ENSSSCG00000012007	HSPA13	heat shock protein family A (Hsp70) member 13 [Source:HGNC Symbol;Acc:HGNC:11375]	128	173	205	270	378	284	1.0932	3.61254	3.82066e-05
ENSSSCG00000037267	MAX	MYC associated factor X [Source:VGNC Symbol;Acc:VGNC:90046]	411	965	1290	902	2058	1814	1.09286	5.95351	0.00110663
ENSSSCG00000009084	SPATA5	spermatosis associated 5 [Source:VGNC Symbol;Acc:VGNC:93385]	125	128	150	179	313	263	1.09112	3.3083	0.000231707
ENSSSCG00000000559	RASSF8	Ras association domain family member 8 [Source:VGNC Symbol;Acc:VGNC:92128]	791	1076	1806	1233	3737	1714	1.0905	6.43749	0.00212996
ENSSSCG00000046387	ECE2	proteasome 26S subunit, non-ATPase 2 [Source:NCBI gene (formerly Entrezgene);Acc:100627568]	2712	3392	4427	5905	7564	5857	1.09048	7.97966	1.82833e-06
ENSSSCG00000037527	CPLX1	complexin 1 [Source:VGNC Symbol;Acc:VGNC:86943]	146	140	156	212	262	357	1.08989	3.4484	0.00020727
ENSSSCG00000030095	ZBTB16	zinc finger and BTB domain containing 16 [Source:HGNC Symbol;Acc:HGNC:12930]	1044	2063	2707	2378	4778	3296	1.08953	7.08674	0.000228891
ENSSSCG00000000743	FKBP4	FKBP prolyl isomerase 4 [Source:VGNC Symbol;Acc:VGNC:88147]	2695	3279	4136	5580	7317	5694	1.08831	7.92399	1.60147e-06
ENSSSCG00000009814	ANAPC5	anaphase promoting complex subunit 5 [Source:VGNC Symbol;Acc:VGNC:85299]	281	318	570	579	695	852	1.08756	4.79806	5.31348e-05
ENSSSCG00000031736	MGST2	microsomal glutathione S-transferase 2 [Source:VGNC Symbol;Acc:VGNC:90203]	94	84	103	174	180	171	1.08709	2.79866	0.000205687
ENSSSCG00000015840	WRN	WRN RecQ like helicase [Source:VGNC Symbol;Acc:VGNC:96605]	110	139	174	181	343	255	1.08639	3.35353	0.000283697
ENSSSCG00000024108	SLC43A2	solute carrier family 43 member 2 [Source:VGNC Symbol;Acc:VGNC:93117]	1257	1384	1830	3347	3251	1588	1.08466	6.7508	0.000191826
ENSSSCG00000000843	TXNRD1	thioredoxin reductase 1 [Source:NCBI gene (formerly Entrezgene);Acc:396681]	849	1065	1759	2064	2517	2045	1.08202	6.43944	1.25187e-05
ENSSSCG00000008877	ETFDH	electron transfer flavoprotein dehydrogenase [Source:VGNC Symbol;Acc:VGNC:87803]	5221	7402	11227	13360	15029	14479	1.08177	9.13247	7.01407e-06
ENSSSCG00000026395	TARS2	threonyl-tRNA synthetase 2, mitochondrial [Source:VGNC Symbol;Acc:VGNC:96766]	53	49	71	86	113	120	1.07628	2.09011	0.000894146
ENSSSCG00000010219	ARID5B	AT-rich interaction domain 5B [Source:VGNC Symbol;Acc:VGNC:85511]	268	574	536	370	1694	427	1.07515	5.01683	0.0187123
ENSSSCG00000045048	nan	nan	166	327	339	414	616	456	1.06858	4.28862	7.58053e-05
ENSSSCG00000027472	GCA	grancalcin [Source:VGNC Symbol;Acc:VGNC:95726]	75	75	101	91	168	202	1.06636	2.61006	0.00236238
ENSSSCG00000040439	TMED5	transmembrane p24 trafficking protein 5 [Source:VGNC Symbol;Acc:VGNC:94057]	983	1128	1835	1866	3271	1968	1.06628	6.54048	9.12892e-05
ENSSSCG00000031869	VPS72	vacuolar protein sorting 72 homolog [Source:VGNC Symbol;Acc:VGNC:94863]	458	525	786	757	1663	771	1.0603	5.38658	0.000597984
ENSSSCG00000010198	BMS1	BMS1 ribosome biosis factor [Source:VGNC Symbol;Acc:VGNC:85848]	413	649	764	691	1672	909	1.05924	5.42108	0.000485469
ENSSSCG00000013105	CCDC86	coiled-coil domain containing 86 [Source:VGNC Symbol;Acc:VGNC:86323]	53	52	85	90	167	87	1.05916	2.20012	0.00404493
ENSSSCG00000012825	IKBKG	inhibitor of nuclear factor kappa B kinase regulatory subunit gamma [Source:VGNC Symbol;Acc:VGNC:89072]	536	705	1423	1619	1792	1253	1.0586	5.94366	0.000241322
ENSSSCG00000040621	ARHGEF33	Rho guanine nucleotide exchange factor 33 [Source:VGNC Symbol;Acc:VGNC:85497]	35	51	107	67	138	135	1.05854	2.18015	0.00992888
ENSSSCG00000013397	ARNTL	aryl hydrocarbon receptor nuclear translocator like [Source:VGNC Symbol;Acc:VGNC:96796]	72	87	170	112	339	135	1.05821	2.95164	0.013135
ENSSSCG00000050590	nan	nan	76	143	153	206	276	178	1.05786	3.13125	0.00050214
ENSSSCG00000004101	LRP11	LDL receptor related protein 11 [Source:VGNC Symbol;Acc:VGNC:89817]	211	264	327	446	489	505	1.05563	4.25109	9.26542e-06
ENSSSCG00000008448	PREPL	prolyl endopeptidase like [Source:VGNC Symbol;Acc:VGNC:91790]	979	1373	1552	1853	2629	2524	1.0556	6.5248	4.28776e-06
ENSSSCG00000039745	HMOX1	heme oxygenase 1 [Source:VGNC Symbol;Acc:VGNC:98036]	114	118	148	322	252	110	1.05558	3.19552	0.00566987
ENSSSCG00000016062	NABP1	nucleic acid binding protein 1 [Source:VGNC Symbol;Acc:VGNC:96122]	200	352	515	327	1128	426	1.05299	4.62284	0.00813321
ENSSSCG00000017947	ACADVL	acyl-CoA dehydrogenase very long chain [Source:VGNC Symbol;Acc:VGNC:97864]	6250	10025	16760	15887	22464	19147	1.04784	9.5638	0.000120312
ENSSSCG00000031888	DDIT4	DNA damage inducible transcript 4 [Source:VGNC Symbol;Acc:VGNC:87208]	479	1436	918	845	1464	2675	1.04629	6.03063	0.00597656
ENSSSCG00000035730	ZDHHC21	zinc finger DHHC-type palmitoyltransferase 21 [Source:VGNC Symbol;Acc:VGNC:95123]	320	519	597	532	1166	850	1.04627	5.06567	0.000251261
ENSSSCG00000015056	REXO2	RNA exonuclease 2 [Source:VGNC Symbol;Acc:VGNC:92228]	553	470	701	1052	1121	943	1.04563	5.36677	2.16323e-05
ENSSSCG00000013391	PSMA1	nan	1148	937	1678	2151	2661	1950	1.04469	6.48129	5.23216e-05
ENSSSCG00000036239	GJA8	gap junction protein alpha 8 [Source:VGNC Symbol;Acc:VGNC:88461]	19	22	43	32	68	49	1.04457	1.03123	0.0142522
ENSSSCG00000011563	FANCD2	FA complementation group D2 [Source:VGNC Symbol;Acc:VGNC:88003]	38	39	26	87	36	65	1.04367	1.37081	0.0202782
ENSSSCG00000027689	SRM	spermidine synthase [Source:VGNC Symbol;Acc:VGNC:98623]	172	194	238	323	437	322	1.04183	3.844	5.929e-05
ENSSSCG00000010734	OAT	ornithine aminotransferase [Source:NCBI gene (formerly Entrezgene);Acc:100156865]	623	629	1185	1543	1354	1388	1.0403	5.82931	4.88488e-05
ENSSSCG00000036059	HSPB3	heat shock protein family B (small) member 3 [Source:HGNC Symbol;Acc:HGNC:5248]	543	467	868	917	1559	875	1.03796	5.46777	0.000349813
ENSSSCG00000015892	PSMD14	proteasome 26S subunit, non-ATPase 14 [Source:VGNC Symbol;Acc:VGNC:95823]	1046	887	1418	1928	2225	1849	1.0357	6.31292	2.06957e-05
ENSSSCG00000008503	FEZ2	fasciculation and elongation protein zeta 2 [Source:VGNC Symbol;Acc:VGNC:88093]	702	415	983	1118	1241	1417	1.03536	5.64386	0.000445495
ENSSSCG00000009766	ATP6V0A2	ATPase H+ transporting V0 subunit a2 [Source:VGNC Symbol;Acc:VGNC:85664]	106	207	185	202	422	253	1.03523	3.53895	0.00126762
ENSSSCG00000004387	FOXO3	forkhead box O3 [Source:VGNC Symbol;Acc:VGNC:99715]	1234	2221	1918	2061	4552	2884	1.03358	6.96569	0.000273749
ENSSSCG00000033278	ATP6V1D	ATPase H+ transporting V1 subunit D [Source:VGNC Symbol;Acc:VGNC:85674]	369	419	540	725	735	894	1.03201	4.96569	1.10439e-05
ENSSSCG00000021977	GPD1L	nan	592	511	568	893	1504	638	1.02886	5.3295	0.00095357
ENSSSCG00000016577	ATP6V1F	ATPase H+ transporting V1 subunit F [Source:VGNC Symbol;Acc:VGNC:85676]	584	466	834	1388	1104	835	1.02568	5.47394	0.000300262
ENSSSCG00000036551	AGBL1	nan	41	84	179	136	200	177	1.02474	2.78	0.0102431
ENSSSCG00000001411	APOM	apolipoprotein M [Source:VGNC Symbol;Acc:VGNC:85424]	28	67	76	94	81	118	1.02234	1.99045	0.00470268
ENSSSCG00000033791	IMPA1	inositol monophosphatase 1 [Source:VGNC Symbol;Acc:VGNC:89125]	637	438	677	1027	1085	1040	1.0202	5.39101	0.000102481
ENSSSCG00000051257	nan	nan	163	388	418	392	854	413	1.01879	4.45907	0.00274895
ENSSSCG00000009844	HSPB8	heat shock protein family B (small) member 8 [Source:VGNC Symbol;Acc:VGNC:96685]	5166	6428	6489	10631	14369	6902	1.01824	8.72758	0.000168022
ENSSSCG00000029005	KPNA2	karyopherin subunit alpha 2 [Source:VGNC Symbol;Acc:VGNC:89561]	125	116	183	263	273	209	1.01784	3.32164	0.000417401
ENSSSCG00000014830	COA4	cytochrome c oxidase assembly factor 4 homolog [Source:VGNC Symbol;Acc:VGNC:86852]	38	55	58	108	62	92	1.0135	1.84243	0.00422985
ENSSSCG00000011873	HSPBAP1	HSPB1 associated protein 1 [Source:VGNC Symbol;Acc:VGNC:98039]	214	389	437	272	908	621	1.01328	4.57263	0.00439281
ENSSSCG00000027407	MYH14	myosin heavy chain 14 [Source:VGNC Symbol;Acc:VGNC:90511]	914	1881	2245	2769	2755	3026	1.01199	6.83133	7.14173e-05
ENSSSCG00000010990	NOL6	nucleolar protein 6 [Source:VGNC Symbol;Acc:VGNC:95926]	78	145	114	138	270	179	1.0097	2.9741	0.0021079
ENSSSCG00000048711	nan	nan	47	57	79	110	92	115	1.00855	2.10818	0.0014118
ENSSSCG00000009239	LOC100524999	nan	42	28	40	32	90	76	1.0044	1.43512	0.0264266
ENSSSCG00000015592	TATDN3	TatD DNase domain containing 3 [Source:VGNC Symbol;Acc:VGNC:93753]	108	119	163	161	172	347	1.00438	3.18824	0.00336625
ENSSSCG00000006184	TERF1	telomeric repeat binding factor 1 [Source:VGNC Symbol;Acc:VGNC:93881]	373	345	296	552	650	615	1.00375	4.60229	0.000145065
ENSSSCG00000034756	PLB1	phospholipase B1 [Source:VGNC Symbol;Acc:VGNC:91513]	131	276	433	288	351	770	1.00257	4.23038	0.00929029
ENSSSCG00000036431	VPS13C	vacuolar protein sorting 13 homolog C [Source:VGNC Symbol;Acc:VGNC:94840]	707	787	980	1366	1735	1203	1.0008	5.84459	2.09899e-05
ENSSSCG00000001493	PRIM2	DNA primase subunit 2 [Source:VGNC Symbol;Acc:VGNC:91796]	46	41	41	67	86	74	1.00033	1.63798	0.00382501
ENSSSCG00000013433	ADAMTSL5	ADAMTS like 5 [Source:VGNC Symbol;Acc:VGNC:85094]	202	359	432	136	96	188	-1.0014	3.50391	0.00162366
ENSSSCG00000017927	BCL6B	BCL6B transcription repressor [Source:VGNC Symbol;Acc:VGNC:96566]	266	603	417	171	211	167	-1.00191	3.88452	0.000521708
ENSSSCG00000021361	ZNF710	zinc finger protein 710 [Source:HGNC Symbol;Acc:HGNC:25352]	182	336	278	105	91	145	-1.00213	3.20549	0.000923283
ENSSSCG00000010529	SFRP5	secreted frizzled related protein 5 [Source:VGNC Symbol;Acc:VGNC:92777]	126	124	114	84	33	42	-1.00423	2.13954	0.0150072
ENSSSCG00000031125	AMPD2	adenosine monophosphate deaminase 2 [Source:VGNC Symbol;Acc:VGNC:85287]	209	343	335	115	97	167	-1.00615	3.35854	0.000723791
ENSSSCG00000007369	JPH2	nan	3110	5677	4603	1964	1643	2109	-1.00637	7.26072	2.90219e-05
ENSSSCG00000020963	EPDR1	ependymin related 1 [Source:VGNC Symbol;Acc:VGNC:87727]	1517	1457	1691	820	542	671	-1.00656	5.7762	6.84495e-05
ENSSSCG00000037958	TOB2	transducer of ERBB2, 2 [Source:VGNC Symbol;Acc:VGNC:94298]	1505	7894	5419	2019	2088	1977	-1.00844	7.35065	0.00691277
ENSSSCG00000025729	IRS1	insulin receptor substrate 1 [Source:VGNC Symbol;Acc:VGNC:96376]	778	1100	784	458	250	444	-1.0099	4.96126	0.000508241
ENSSSCG00000007927	PPL	periplakin [Source:VGNC Symbol;Acc:VGNC:91702]	376	747	547	185	225	303	-1.01154	4.26229	0.00030026
ENSSSCG00000005997	COL14A1	collagen type XIV alpha 1 chain [Source:VGNC Symbol;Acc:VGNC:97936]	2693	2383	1244	1084	589	1176	-1.0125	6.26489	0.00570999
ENSSSCG00000027922	UNC5CL	unc-5 family C-terminal like [Source:VGNC Symbol;Acc:VGNC:94710]	92	95	184	61	22	73	-1.01545	2.11452	0.0236226
ENSSSCG00000014406	PRELID2	PRELI domain containing 2 [Source:VGNC Symbol;Acc:VGNC:91787]	177	167	176	90	38	98	-1.01615	2.63645	0.00820014
ENSSSCG00000004138	HIVEP2	HIVEP zinc finger 2 [Source:VGNC Symbol;Acc:VGNC:96586]	858	1271	1914	638	538	512	-1.01625	5.51241	7.7285e-05
ENSSSCG00000049125	nan	nan	40	110	158	34	21	71	-1.01634	1.81196	0.0458126
ENSSSCG00000012492	DRP2	dystrophin related protein 2 [Source:VGNC Symbol;Acc:VGNC:87451]	214	177	206	94	49	118	-1.01671	2.83828	0.00583917
ENSSSCG00000005055	LGALS3	galectin 3 [Source:VGNC Symbol;Acc:VGNC:89694]	218	117	214	79	64	99	-1.01786	2.72838	0.0063481
ENSSSCG00000021359	CDC42EP3	CDC42 effector protein 3 [Source:VGNC Symbol;Acc:VGNC:86457]	776	899	912	404	321	389	-1.01806	4.91517	1.97739e-05
ENSSSCG00000008440	PIGF	phosphatidylinositol glycan anchor biosynthesis class F [Source:VGNC Symbol;Acc:VGNC:98193]	997	1023	1199	508	345	533	-1.01957	5.23098	6.68988e-05
ENSSSCG00000017565	SPATA20	spermatosis associated 20 [Source:VGNC Symbol;Acc:VGNC:93380]	436	572	452	193	126	311	-1.02145	4.09599	0.00159841
ENSSSCG00000039315	SOX10	SRY-box transcription factor 10 [Source:VGNC Symbol;Acc:VGNC:93350]	61	69	93	48	19	27	-1.02195	1.4171	0.0145308
ENSSSCG00000037766	NR3C2	nuclear receptor subfamily 3 group C member 2 [Source:VGNC Symbol;Acc:VGNC:90884]	215	310	394	105	83	199	-1.02348	3.3982	0.00272792
ENSSSCG00000009037	ZNF827	zinc finger protein 827 [Source:VGNC Symbol;Acc:VGNC:98970]	62	144	233	57	59	63	-1.02349	2.30826	0.00913319
ENSSSCG00000000443	GLI1	GLI family zinc finger 1 [Source:VGNC Symbol;Acc:VGNC:88482]	65	62	69	41	15	28	-1.02405	1.2603	0.0167003
ENSSSCG00000023181	ZNF385B	zinc finger protein 385B [Source:VGNC Symbol;Acc:VGNC:98425]	215	126	289	121	94	55	-1.02479	2.89657	0.0101321
ENSSSCG00000004961	ITGA11	integrin subunit alpha 11 [Source:VGNC Symbol;Acc:VGNC:89233]	82	89	105	58	15	44	-1.02496	1.72285	0.0248789
ENSSSCG00000050245	CCDC13	nan	72	176	196	51	39	93	-1.02518	2.33866	0.0128413
ENSSSCG00000018046	LOC102157639	nan	58	92	96	47	27	29	-1.02544	1.54264	0.0055366
ENSSSCG00000026724	GUCY2C	phospholipase B domain containing 1 [Source:NCBI gene (formerly Entrezgene);Acc:100155493]	723	600	1032	473	227	299	-1.02579	4.77262	0.0011017
ENSSSCG00000024917	nan	nan	221	490	296	246	51	121	-1.02629	3.53416	0.0270086
ENSSSCG00000037832	PMP22	peripheral myelin protein 22 [Source:VGNC Symbol;Acc:VGNC:91590]	3089	1970	2345	1416	1019	832	-1.02646	6.4745	0.000935373
ENSSSCG00000003547	NCMAP	non-compact myelin associated protein [Source:VGNC Symbol;Acc:VGNC:90614]	100	123	113	65	30	48	-1.02717	2.00157	0.00529891
ENSSSCG00000008738	CC2D2A	coiled-coil and C2 domain containing 2A [Source:VGNC Symbol;Acc:VGNC:86237]	140	172	158	70	57	74	-1.02794	2.47462	0.000727488
ENSSSCG00000001914	LOXL1	lysyl oxidase like 1 [Source:VGNC Symbol;Acc:VGNC:89780]	138	124	212	121	32	45	-1.03031	2.47411	0.0292713
ENSSSCG00000004921	ATP8B1	ATPase phospholipid transporting 8B1 [Source:VGNC Symbol;Acc:VGNC:85679]	303	481	416	210	130	164	-1.03226	3.79102	0.000261296
ENSSSCG00000024219	TIGAR	TP53 induced glycolysis regulatory phosphatase [Source:VGNC Symbol;Acc:VGNC:93980]	572	1084	1494	358	344	593	-1.03312	5.13552	0.000530123
ENSSSCG00000029227	LDB2	LIM domain binding 2 [Source:VGNC Symbol;Acc:VGNC:89668]	399	507	449	189	159	230	-1.03353	3.98151	8.19051e-05
ENSSSCG00000013401	DKK3	dickkopf WNT signaling pathway inhibitor 3 [Source:VGNC Symbol;Acc:VGNC:87323]	188	76	123	58	46	69	-1.03436	2.26256	0.0181596
ENSSSCG00000032157	GVQW3	GVQW motif containing 3 [Source:VGNC Symbol;Acc:VGNC:88755]	28	54	103	25	25	25	-1.03517	1.10845	0.0179882
ENSSSCG00000048318	STAC	nan	355	209	166	127	75	125	-1.0379	3.17309	0.0114415
ENSSSCG00000027124	nan	nan	132	130	92	69	34	50	-1.03853	2.10235	0.00903303
ENSSSCG00000009166	MANBA	mannosidase beta [Source:VGNC Symbol;Acc:VGNC:89970]	178	153	138	105	37	60	-1.03911	2.49981	0.0139793
ENSSSCG00000027667	EML1	EMAP like 1 [Source:VGNC Symbol;Acc:VGNC:87682]	753	1318	1037	460	461	378	-1.04188	5.15057	2.27558e-05
ENSSSCG00000005086	SIX6	SIX homeobox 6 [Source:VGNC Symbol;Acc:VGNC:92897]	257	626	238	125	96	251	-1.04191	3.69351	0.0125818
ENSSSCG00000033074	ZCCHC24	zinc finger CCHC-type containing 24 [Source:HGNC Symbol;Acc:HGNC:26911]	1892	2863	2834	852	982	1347	-1.04281	6.43442	1.41901e-05
ENSSSCG00000005480	RGS3	regulator of G protein signaling 3 [Source:VGNC Symbol;Acc:VGNC:103161]	1002	1339	1183	559	391	534	-1.04454	5.34658	2.29536e-05
ENSSSCG00000031489	DUSP22	dual specificity phosphatase 22 [Source:VGNC Symbol;Acc:VGNC:87482]	1047	1150	1274	584	427	453	-1.04475	5.32858	1.80176e-05
ENSSSCG00000038038	SBK1	SH3 domain binding kinase 1 [Source:VGNC Symbol;Acc:VGNC:92595]	495	663	458	308	168	206	-1.0487	4.23802	0.000552837
ENSSSCG00000012408	NHSL2	NHS like 2 [Source:VGNC Symbol;Acc:VGNC:98155]	132	231	163	102	45	71	-1.04992	2.61299	0.0046787
ENSSSCG00000013901	IFI30	IFI30 lysosomal thiol reductase [Source:VGNC Symbol;Acc:VGNC:89031]	134	69	62	57	30	30	-1.05439	1.73411	0.0316963
ENSSSCG00000005641	DNM1	dynamin 1 [Source:VGNC Symbol;Acc:VGNC:87380]	83	182	114	54	24	78	-1.05591	2.13803	0.0163984
ENSSSCG00000034441	MRGPRF	MAS related GPR family member F [Source:VGNC Symbol;Acc:VGNC:100172]	90	132	147	55	47	50	-1.0573	2.10092	0.00066728
ENSSSCG00000005457	LPAR1	lysophosphatidic acid receptor 1 [Source:VGNC Symbol;Acc:VGNC:103117]	268	210	181	95	70	120	-1.05849	2.98835	0.00287876
ENSSSCG00000044553	DDIT3	DNA damage inducible transcript 3 [Source:NCBI gene (formerly Entrezgene);Acc:100240743]	75	130	120	37	58	39	-1.05949	1.9199	0.00176955
ENSSSCG00000029945	GCAT	glycine C-acetyltransferase [Source:VGNC Symbol;Acc:VGNC:88378]	82	42	111	26	34	39	-1.06031	1.49699	0.013889
ENSSSCG00000027426	BCL3	BCL3 transcription coactivator [Source:VGNC Symbol;Acc:VGNC:96564]	116	111	171	61	42	62	-1.06077	2.21958	0.00152187
ENSSSCG00000008168	RNF149	ring finger protein 149 [Source:VGNC Symbol;Acc:VGNC:92362]	485	963	906	259	276	427	-1.06085	4.72616	0.000115485
ENSSSCG00000040904	CLDN1	claudin 1 [Source:NCBI gene (formerly Entrezgene);Acc:100625166]	284	273	228	167	71	94	-1.06136	3.22009	0.00430105
ENSSSCG00000037852	nan	nan	81	147	159	63	43	51	-1.06282	2.15333	0.00165878
ENSSSCG00000035419	RARRES2	retinoic acid receptor responder 2 [Source:VGNC Symbol;Acc:VGNC:92098]	667	405	485	258	189	225	-1.06497	4.22219	0.000809135
ENSSSCG00000006829	SYPL2	synaptophysin like 2 [Source:VGNC Symbol;Acc:VGNC:93677]	6732	10498	9134	4402	2774	3651	-1.06595	8.22703	2.21171e-05
ENSSSCG00000025652	CDH1	cadherin 1 [Source:VGNC Symbol;Acc:VGNC:86473]	68	34	72	40	18	15	-1.06664	1.0959	0.0361133
ENSSSCG00000034297	HES2	hes family bHLH transcription factor 2 [Source:VGNC Symbol;Acc:VGNC:88855]	65	88	68	30	28	34	-1.0669	1.40503	0.00242792
ENSSSCG00000005975	MTSS1	MTSS I-BAR domain containing 1 [Source:VGNC Symbol;Acc:VGNC:90474]	413	574	500	180	181	257	-1.06712	4.09715	4.06679e-05
ENSSSCG00000026427	RORC	RAR related orphan receptor C [Source:VGNC Symbol;Acc:VGNC:92410]	375	263	414	100	101	245	-1.06742	3.62582	0.0043837
ENSSSCG00000029949	CD248	CD248 molecule [Source:VGNC Symbol;Acc:VGNC:86402]	116	141	175	95	40	41	-1.06807	2.32705	0.00754785
ENSSSCG00000002315	SLC8A3	solute carrier family 8 member A3 [Source:VGNC Symbol;Acc:VGNC:93180]	233	306	397	54	204	129	-1.0688	3.41576	0.00546478
ENSSSCG00000038260	nan	nan	202	516	403	177	141	132	-1.07054	3.6527	0.000568081
ENSSSCG00000011959	ABI3BP	ABI family member 3 binding protein [Source:HGNC Symbol;Acc:HGNC:17265]	708	678	377	362	118	272	-1.07264	4.397	0.00856184
ENSSSCG00000004632	GLDN	gliomedin [Source:VGNC Symbol;Acc:VGNC:88479]	68	105	91	41	34	33	-1.07503	1.63577	0.00134441
ENSSSCG00000015281	PLEKHA6	pleckstrin homology domain containing A6 [Source:VGNC Symbol;Acc:VGNC:91536]	109	194	157	73	42	72	-1.07553	2.40785	0.00175216
ENSSSCG00000010322	ZNF503	zinc finger protein 503 [Source:VGNC Symbol;Acc:VGNC:95252]	303	344	371	119	147	156	-1.07642	3.55657	3.61958e-05
ENSSSCG00000011400	SEMA3B	semaphorin 3B [Source:VGNC Symbol;Acc:VGNC:92694]	440	374	333	185	79	221	-1.07857	3.765	0.0040154
ENSSSCG00000034491	PRICKLE1	prickle planar cell polarity protein 1 [Source:VGNC Symbol;Acc:VGNC:91793]	124	90	89	61	23	44	-1.07918	1.8797	0.014108
ENSSSCG00000040728	EYA1	EYA transcriptional coactivator and phosphatase 1 [Source:VGNC Symbol;Acc:VGNC:87851]	248	216	255	120	74	105	-1.08082	3.07697	0.000657876
ENSSSCG00000002712	LDHD	lactate dehydrogenase D [Source:VGNC Symbol;Acc:VGNC:89670]	789	1304	1506	491	358	597	-1.08174	5.33173	3.86557e-05
ENSSSCG00000013614	CNN1	calponin 1 [Source:VGNC Symbol;Acc:VGNC:86825]	345	895	436	305	225	144	-1.08222	4.24327	0.0027032
ENSSSCG00000034378	IFNGR2	interferon gamma receptor 2 [Source:VGNC Symbol;Acc:VGNC:89042]	392	512	291	214	150	133	-1.08347	3.8058	0.000861871
ENSSSCG00000032330	THY1	Thy-1 cell surface antigen [Source:VGNC Symbol;Acc:VGNC:93973]	1202	680	469	609	134	275	-1.08431	4.84854	0.0322634
ENSSSCG00000008874	TMEM144	transmembrane protein 144 [Source:VGNC Symbol;Acc:VGNC:94091]	82	86	65	37	18	42	-1.0857	1.49286	0.00890195
ENSSSCG00000017376	MEOX1	mesenchyme homeobox 1 [Source:VGNC Symbol;Acc:VGNC:90141]	43	72	126	50	15	29	-1.08668	1.46579	0.0265519
ENSSSCG00000005449	PTPN3	protein tyrosine phosphatase non-receptor type 3 [Source:VGNC Symbol;Acc:VGNC:91980]	502	602	987	320	304	214	-1.08693	4.55314	8.07648e-05
ENSSSCG00000013784	DNAJB1	DnaJ heat shock protein family (Hsp40) member B1 [Source:VGNC Symbol;Acc:VGNC:96614]	602	966	919	326	302	378	-1.08739	4.81218	5.24283e-06
ENSSSCG00000013073	FADS3	fatty acid desaturase 3 [Source:VGNC Symbol;Acc:VGNC:87877]	140	306	259	128	73	79	-1.08774	2.99278	0.00162313
ENSSSCG00000009526	ITGBL1	integrin subunit beta like 1 [Source:VGNC Symbol;Acc:VGNC:89247]	489	510	302	245	122	178	-1.09001	3.94415	0.00201231
ENSSSCG00000033830	CCDC8	coiled-coil domain containing 8 [Source:VGNC Symbol;Acc:VGNC:86314]	481	535	626	257	80	331	-1.0912	4.2335	0.00558472
ENSSSCG00000017923	ALOX12	arachidonate 15-lipoxygenase [Source:NCBI gene (formerly Entrezgene);Acc:396971]	57	179	230	61	38	81	-1.09364	2.36625	0.0130556
ENSSSCG00000038071	RASL12	RAS like family 12 [Source:VGNC Symbol;Acc:VGNC:92121]	186	331	291	145	56	121	-1.0947	3.19677	0.00253564
ENSSSCG00000004049	ACAT2	acetyl-CoA acetyltransferase 2 [Source:VGNC Symbol;Acc:VGNC:85005]	117	90	67	39	40	37	-1.09484	1.74248	0.00595254
ENSSSCG00000010071	MMP11	matrix metallopeptidase 11 [Source:VGNC Symbol;Acc:VGNC:90267]	1600	2756	3948	1275	785	1199	-1.09514	6.51497	0.0001045
ENSSSCG00000017131	FN3K	fructosamine 3 kinase [Source:VGNC Symbol;Acc:VGNC:88176]	375	424	615	196	168	204	-1.09886	4.00148	2.11113e-05
ENSSSCG00000005994	SNTB1	syntrophin beta 1 [Source:VGNC Symbol;Acc:VGNC:93297]	1673	1419	525	234	628	714	-1.09961	5.45076	0.0161099
ENSSSCG00000009007	TMEM131L	transmembrane 131 like [Source:VGNC Symbol;Acc:VGNC:94079]	248	343	328	172	71	125	-1.10229	3.39296	0.00111848
ENSSSCG00000031692	nan	nan	370	717	596	254	152	262	-1.10257	4.23977	0.000155565
ENSSSCG00000003351	MMP23	matrix metallopeptidase 23 [Source:VGNC Symbol;Acc:VGNC:98502]	88	90	31	32	16	40	-1.10665	1.36648	0.0396229
ENSSSCG00000002001	REC8	REC8 meiotic recombination protein [Source:VGNC Symbol;Acc:VGNC:92193]	138	240	93	65	88	39	-1.11027	2.46183	0.0105304
ENSSSCG00000008115	LOC100738720	mal, T cell differentiation protein [Source:HGNC Symbol;Acc:HGNC:6817]	82	49	48	30	11	34	-1.11195	1.15158	0.0305065
ENSSSCG00000004484	COL12A1	collagen type XII alpha 1 chain [Source:VGNC Symbol;Acc:VGNC:86864]	910	910	695	426	215	391	-1.11368	4.87424	0.000395858
ENSSSCG00000004755	DLL4	delta like canonical Notch ligand 4 [Source:VGNC Symbol;Acc:VGNC:87337]	192	461	236	147	82	122	-1.11397	3.32995	0.00212901
ENSSSCG00000013237	SPI1	Spi-1 proto-onco [Source:VGNC Symbol;Acc:VGNC:98335]	321	194	408	136	118	120	-1.11543	3.41616	0.000662167
ENSSSCG00000016131	ADAM23	ADAM metallopeptidase domain 23 [Source:VGNC Symbol;Acc:VGNC:95933]	151	153	78	88	19	50	-1.11664	2.19764	0.0341451
ENSSSCG00000000456	SLC16A7	solute carrier family 16 member 7 [Source:VGNC Symbol;Acc:VGNC:92947]	79	123	219	73	52	37	-1.11675	2.23786	0.00522005
ENSSSCG00000035355	F2R	coagulation factor II thrombin receptor [Source:VGNC Symbol;Acc:VGNC:87860]	86	169	132	64	47	41	-1.11887	2.14615	0.00141346
ENSSSCG00000007350	PPP1R16B	protein phosphatase 1 regulatory subunit 16B [Source:VGNC Symbol;Acc:VGNC:95669]	357	785	481	253	139	246	-1.12037	4.18741	0.00050554
ENSSSCG00000016925	PLK2	polo like kinase 2 [Source:VGNC Symbol;Acc:VGNC:91563]	574	449	237	254	148	126	-1.12144	3.9211	0.00630786
ENSSSCG00000042332	nan	nan	68	94	116	21	20	69	-1.12189	1.68338	0.0180319
ENSSSCG00000003569	SLC9A1	solute carrier family 9 member A1 [Source:NCBI gene (formerly Entrezgene);Acc:397458]	427	417	326	202	137	138	-1.12313	3.77352	0.000284196
ENSSSCG00000040337	AK4	adenylate kinase 4 [Source:VGNC Symbol;Acc:VGNC:85209]	403	696	280	200	198	158	-1.12415	3.98845	0.000923434
ENSSSCG00000047367	nan	nan	85	157	73	19	24	84	-1.12425	1.88049	0.0385581
ENSSSCG00000037918	ADIRF	adiposis regulatory factor [Source:VGNC Symbol;Acc:VGNC:85142]	67	96	59	31	26	32	-1.12598	1.39907	0.00281767
ENSSSCG00000016810	PDZD2	nan	435	625	740	228	279	200	-1.12697	4.33171	6.15744e-06
ENSSSCG00000029838	nan	nan	136	154	216	65	44	90	-1.1314	2.52912	0.000968943
ENSSSCG00000013145	DTX4	deltex E3 ubiquitin ligase 4 [Source:VGNC Symbol;Acc:VGNC:87470]	187	220	145	95	51	76	-1.13255	2.69039	0.00177243
ENSSSCG00000014310	CXCL14	C-X-C motif chemokine ligand 14 [Source:VGNC Symbol;Acc:VGNC:87105]	101	103	137	65	20	49	-1.13321	1.98377	0.00761179
ENSSSCG00000001695	VEGFA	vascular endothelial growth factor A [Source:VGNC Symbol;Acc:VGNC:94815]	2957	5515	5828	2023	1687	1812	-1.13325	7.29837	2.91613e-06
ENSSSCG00000014827	PLEKHB1	pleckstrin homology domain containing B1 [Source:VGNC Symbol;Acc:VGNC:91538]	227	178	188	108	54	78	-1.13341	2.80281	0.0019326
ENSSSCG00000009842	CCDC60	coiled-coil domain containing 60 [Source:HGNC Symbol;Acc:HGNC:28610]	540	590	609	125	57	517	-1.13355	4.31211	0.0372492
ENSSSCG00000013072	FADS2	fatty acid desaturase 2 [Source:VGNC Symbol;Acc:VGNC:87876]	468	541	435	250	129	198	-1.13372	4.05478	0.000203885
ENSSSCG00000003821	KANK4	KN motif and ankyrin repeat domains 4 [Source:VGNC Symbol;Acc:VGNC:89298]	93	107	77	45	16	50	-1.13444	1.71478	0.0111877
ENSSSCG00000002385	TGFB3	transforming growth factor beta 3 [Source:VGNC Symbol;Acc:VGNC:98367]	169	204	173	94	72	51	-1.13486	2.65944	0.000750219
ENSSSCG00000038911	KLF2	Kruppel like factor 2 [Source:VGNC Symbol;Acc:VGNC:89497]	161	1421	1157	275	417	325	-1.13576	4.85672	0.0168282
ENSSSCG00000023975	CCDC9B	coiled-coil domain containing 9B [Source:VGNC Symbol;Acc:VGNC:86332]	2920	3418	2656	1380	1001	1221	-1.13614	6.68616	7.20696e-06
ENSSSCG00000035074	FOXO6	forkhead box O6 [Source:HGNC Symbol;Acc:HGNC:24814]	59	129	207	54	41	54	-1.13619	2.12886	0.00430554
ENSSSCG00000016318	ASB18	ankyrin repeat and SOCS box containing 18 [Source:VGNC Symbol;Acc:VGNC:95922]	386	300	430	168	176	103	-1.13654	3.68539	0.000243754
ENSSSCG00000016464	CASP2	chloride voltage-gated channel 1 [Source:HGNC Symbol;Acc:HGNC:2019]	1010	1929	1686	688	370	729	-1.13876	5.67926	9.02646e-05
ENSSSCG00000000411	NAB2	NGFI-A binding protein 2 [Source:VGNC Symbol;Acc:VGNC:90560]	142	204	222	68	85	69	-1.13974	2.68668	9.06907e-05
ENSSSCG00000045673	RTP3	nan	23	75	120	27	19	35	-1.14008	1.28687	0.0234967
ENSSSCG00000005249	FAM189A2	family with sequence similarity 189 member A2 [Source:VGNC Symbol;Acc:VGNC:87944]	1213	1610	954	538	447	528	-1.14033	5.43758	2.8159e-05
ENSSSCG00000036078	KCNJ3	potassium inwardly rectifying channel subfamily J member 3 [Source:HGNC Symbol;Acc:HGNC:6264]	214	279	246	97	79	116	-1.14094	3.07932	8.64385e-05
ENSSSCG00000037970	SOX8	SRY-box transcription factor 8 [Source:VGNC Symbol;Acc:VGNC:93359]	126	89	95	66	37	22	-1.14223	1.89077	0.0122414
ENSSSCG00000037142	LOC110258364	nan	82	58	61	34	20	27	-1.14635	1.28421	0.00571208
ENSSSCG00000011521	PDZRN3	PDZ domain containing ring finger 3 [Source:VGNC Symbol;Acc:VGNC:91298]	1748	1603	1770	981	410	636	-1.14641	5.87344	0.000258918
ENSSSCG00000046645	nan	nan	183	201	235	87	84	72	-1.14721	2.82354	6.50929e-05
ENSSSCG00000036135	COL1A1	collagen type I alpha 1 chain [Source:VGNC Symbol;Acc:VGNC:86870]	22206	20838	8363	12424	3001	5405	-1.15454	9.2472	0.0180252
ENSSSCG00000047186	nan	nan	57	58	66	22	28	21	-1.15462	1.10513	0.00146564
ENSSSCG00000015753	ANGPT2	angiopoietin 2 [Source:NCBI gene (formerly Entrezgene);Acc:396730]	266	147	148	115	52	62	-1.15571	2.75308	0.00926796
ENSSSCG00000001076	RNF144B	ring finger protein 144B [Source:VGNC Symbol;Acc:VGNC:92359]	1431	1111	1619	412	444	798	-1.1558	5.56861	9.39706e-05
ENSSSCG00000026900	CDIN1	CDAN1 interacting nuclease 1 [Source:VGNC Symbol;Acc:VGNC:85960]	268	178	435	123	124	95	-1.15699	3.3164	0.000747362
ENSSSCG00000002806	MMP15	matrix metallopeptidase 15 [Source:VGNC Symbol;Acc:VGNC:90270]	315	497	488	211	147	139	-1.16126	3.85854	3.10072e-05
ENSSSCG00000038829	LOC100621428	nan	249	363	680	110	124	252	-1.16449	3.81566	0.00144802
ENSSSCG00000033001	FZD8	frizzled class receptor 8 [Source:VGNC Symbol;Acc:VGNC:96311]	66	105	99	36	20	47	-1.16948	1.63278	0.00240057
ENSSSCG00000009203	SNCA	synuclein alpha [Source:VGNC Symbol;Acc:VGNC:93285]	99	52	67	48	12	27	-1.1698	1.40434	0.0278142
ENSSSCG00000040445	RND3	Rho family GTPase 3 [Source:VGNC Symbol;Acc:VGNC:96407]	829	975	826	341	319	366	-1.17225	4.89921	1.31707e-06
ENSSSCG00000015664	CD55	CD55 molecule (Cromer blood group) [Source:NCBI gene (formerly Entrezgene);Acc:396743]	113	104	294	101	36	52	-1.17283	2.50056	0.012743
ENSSSCG00000012234	SRPX	sushi repeat containing protein X-linked [Source:HGNC Symbol;Acc:HGNC:11309]	287	236	90	117	45	87	-1.17321	2.88186	0.0191401
ENSSSCG00000041032	LOC106509609	nan	187	208	273	93	116	47	-1.17439	2.91551	0.000830978
ENSSSCG00000004192	CCN2	cellular communication network factor 2 [Source:VGNC Symbol;Acc:VGNC:86345]	504	1005	1525	458	312	336	-1.18744	5.02416	0.000106546
ENSSSCG00000037260	COL20A1	nan	51	64	58	23	15	28	-1.18767	1.03035	0.00217227
ENSSSCG00000002333	DPF3	double PHD fingers 3 [Source:VGNC Symbol;Acc:VGNC:87414]	386	668	553	185	147	275	-1.18843	4.15573	3.7833e-05
ENSSSCG00000030655	nan	nan	65	103	77	29	33	31	-1.19127	1.50192	0.000599085
ENSSSCG00000039161	MEIS1	Meis homeobox 1 [Source:VGNC Symbol;Acc:VGNC:90135]	172	131	64	37	32	79	-1.19499	2.14413	0.0176834
ENSSSCG00000032601	RASSF2	Ras association domain family member 2 [Source:VGNC Symbol;Acc:VGNC:96531]	62	83	83	51	16	18	-1.19633	1.39902	0.0108163
ENSSSCG00000015474	PPFIA4	PTPRF interacting protein alpha 4 [Source:VGNC Symbol;Acc:VGNC:91694]	192	257	227	115	58	82	-1.1972	2.93349	0.000297296
ENSSSCG00000032053	ST8SIA5	ST8 alpha-N-acetyl-neuraminide alpha-2,8-sialyltransferase 5 [Source:VGNC Symbol;Acc:VGNC:93520]	564	963	1461	465	282	341	-1.19839	5.00932	5.52769e-05
ENSSSCG00000044913	nan	nan	1313	2329	1479	570	526	839	-1.20058	5.82894	1.09337e-05
ENSSSCG00000023001	CCDC149	coiled-coil domain containing 149 [Source:VGNC Symbol;Acc:VGNC:86262]	450	609	483	204	152	229	-1.20168	4.11495	8.68875e-06
ENSSSCG00000022925	SLC2A3	nan	595	569	368	250	161	185	-1.20342	4.1475	0.000214751
ENSSSCG00000016260	SLC16A14	solute carrier family 16 member 14 [Source:VGNC Symbol;Acc:VGNC:96129]	93	212	64	32	42	66	-1.20599	2.07689	0.0107517
ENSSSCG00000040207	P2RY2	purinergic receptor P2Y2 [Source:VGNC Symbol;Acc:VGNC:98173]	224	199	395	114	93	97	-1.20779	3.18521	0.000133996
ENSSSCG00000017734	RHBDL3	rhomboid like 3 [Source:VGNC Symbol;Acc:VGNC:92279]	75	62	70	32	30	17	-1.20838	1.29096	0.0024823
ENSSSCG00000030565	GRIA4	glutamate ionotropic receptor AMPA type subunit 4 [Source:VGNC Symbol;Acc:VGNC:88673]	143	79	73	43	44	30	-1.20891	1.83057	0.00679372
ENSSSCG00000015522	ANGPTL1	angiopoietin like 1 [Source:VGNC Symbol;Acc:VGNC:85303]	945	576	472	362	102	322	-1.21229	4.55462	0.00678399
ENSSSCG00000030005	LGALSL	galectin like [Source:VGNC Symbol;Acc:VGNC:89698]	1957	1445	1913	547	533	962	-1.21553	5.91486	3.44857e-05
ENSSSCG00000025924	IGFBP5	insulin like growth factor binding protein 5 [Source:VGNC Symbol;Acc:VGNC:96368]	715	1702	579	320	162	637	-1.2183	5.05411	0.00728549
ENSSSCG00000007231	MYLK2	myosin light chain kinase 2 [Source:VGNC Symbol;Acc:VGNC:95797]	5624	11114	8237	2224	2350	4665	-1.21901	8.09076	6.12271e-05
ENSSSCG00000022446	SEL1L3	SEL1L family member 3 [Source:VGNC Symbol;Acc:VGNC:92688]	363	851	844	338	154	246	-1.2202	4.46995	0.000249826
ENSSSCG00000016983	STC2	stanniocalcin 2 [Source:VGNC Symbol;Acc:VGNC:93543]	154	155	360	82	105	56	-1.22259	2.87398	0.00109727
ENSSSCG00000023806	LRRN1	leucine rich repeat neuronal 1 [Source:VGNC Symbol;Acc:VGNC:89860]	330	202	183	119	85	75	-1.22311	3.07513	0.00170188
ENSSSCG00000005943	ST3GAL1	ST3 beta-galactoside alpha-2,3-sialyltransferase 1 [Source:VGNC Symbol;Acc:VGNC:98863]	897	1467	1732	484	398	608	-1.22588	5.47277	1.45185e-06
ENSSSCG00000016887	ITGA2	integrin subunit alpha 2 [Source:VGNC Symbol;Acc:VGNC:89234]	80	160	93	31	18	74	-1.22749	1.91409	0.0119813
ENSSSCG00000038767	MBP	myelin basic protein [Source:VGNC Symbol;Acc:VGNC:103124]	1511	1692	1841	741	431	701	-1.22754	5.80897	2.76641e-06
ENSSSCG00000021591	RBM3	RNA binding motif protein 3 [Source:NCBI gene (formerly Entrezgene);Acc:100627807]	1658	2107	1409	584	499	867	-1.23023	5.86127	1.19107e-05
ENSSSCG00000000111	BAIAP2L2	BAR/IMD domain containing adaptor protein 2 like 2 [Source:VGNC Symbol;Acc:VGNC:85750]	141	206	186	71	40	84	-1.23829	2.57608	0.000337227
ENSSSCG00000028512	LDLR	low density lipoprotein receptor [Source:VGNC Symbol;Acc:VGNC:89671]	744	723	645	280	262	245	-1.25156	4.575	1.70299e-06
ENSSSCG00000041717	nan	nan	134	89	104	37	36	50	-1.2556	1.93241	0.00100734
ENSSSCG00000014336	EGR1	early growth response 1 [Source:VGNC Symbol;Acc:VGNC:87590]	612	692	467	176	102	382	-1.25778	4.32162	0.00174431
ENSSSCG00000015368	HDAC9	histone deacetylase 9 [Source:HGNC Symbol;Acc:HGNC:14065]	543	390	527	218	162	161	-1.25811	4.04561	2.10032e-05
ENSSSCG00000000261	IGFBP6	insulin like growth factor binding protein 6 [Source:VGNC Symbol;Acc:VGNC:89059]	716	709	748	319	186	291	-1.26	4.60149	6.43663e-06
ENSSSCG00000002383	FOS	Fos proto-onco, AP-1 transcription factor subunit [Source:NCBI gene (formerly Entrezgene);Acc:100144486]	1629	1169	559	234	424	653	-1.26078	5.30059	0.00369971
ENSSSCG00000014219	CDO1	cysteine dioxygenase type 1 [Source:VGNC Symbol;Acc:VGNC:86518]	289	181	79	95	48	70	-1.26239	2.71818	0.0132884
ENSSSCG00000013753	nan	nan	151	194	260	71	66	79	-1.26452	2.73588	1.877e-05
ENSSSCG00000006737	IGSF3	immunoglobulin superfamily member 3 [Source:VGNC Symbol;Acc:VGNC:89067]	253	261	194	128	72	60	-1.26606	3.01054	0.000708193
ENSSSCG00000039056	GAS7	growth arrest specific 7 [Source:VGNC Symbol;Acc:VGNC:88359]	326	425	393	184	99	128	-1.26773	3.66286	2.3285e-05
ENSSSCG00000041180	nan	nan	73	66	82	34	28	18	-1.27012	1.3524	0.000949732
ENSSSCG00000039873	DCXR	dicarbonyl and L-xylulose reductase [Source:VGNC Symbol;Acc:VGNC:98985]	1146	2246	1058	673	445	479	-1.27049	5.61114	4.66908e-05
ENSSSCG00000006243	PENK	proenkephalin [Source:VGNC Symbol;Acc:VGNC:91312]	256	175	62	101	32	56	-1.27182	2.56127	0.0260083
ENSSSCG00000039921	LOC100153854	nan	60	80	93	21	25	37	-1.27561	1.39973	0.000418201
ENSSSCG00000036060	RRAD	RRAD, Ras related glycolysis inhibitor and calcium channel regulator [Source:VGNC Symbol;Acc:VGNC:92454]	644	885	706	367	368	64	-1.27979	4.62292	0.00566802
ENSSSCG00000048443	APLN	apelin [Source:HGNC Symbol;Acc:HGNC:16665]	92	124	110	71	17	27	-1.28008	1.87851	0.00844002
ENSSSCG00000047250	nan	nan	39	145	56	21	23	40	-1.28076	1.42222	0.01117
ENSSSCG00000022797	PPP1R3B	protein phosphatase 1 regulatory subunit 3B [Source:VGNC Symbol;Acc:VGNC:95636]	4369	3729	3681	1562	379	2372	-1.28146	7.04753	0.00559853
ENSSSCG00000000838	SLC41A2	solute carrier family 41 member 2 [Source:VGNC Symbol;Acc:VGNC:93114]	90	63	53	35	10	31	-1.28595	1.29108	0.0119165
ENSSSCG00000008991	FRAS1	Fraser extracellular matrix complex subunit 1 [Source:VGNC Symbol;Acc:VGNC:88232]	663	641	525	303	186	174	-1.28906	4.36304	3.13862e-05
ENSSSCG00000038869	APLNR	apelin receptor [Source:VGNC Symbol;Acc:VGNC:85412]	264	139	144	100	53	51	-1.2901	2.68047	0.00374964
ENSSSCG00000004811	PGPEP1L	pyroglutamyl-peptidase I like [Source:VGNC Symbol;Acc:VGNC:91361]	41	149	146	27	12	75	-1.29016	1.856	0.0291236
ENSSSCG00000017909	nan	nan	191	300	279	80	61	129	-1.29707	3.07422	8.11023e-05
ENSSSCG00000001434	EGFL8	EGF like domain multiple 8 [Source:VGNC Symbol;Acc:VGNC:87585]	145	96	104	69	23	33	-1.29964	2.00072	0.00593566
ENSSSCG00000014047	FGFR4	fibroblast growth factor receptor 4 [Source:VGNC Symbol;Acc:VGNC:88120]	140	143	173	74	38	48	-1.30523	2.34871	0.000216474
ENSSSCG00000005085	C1H14orf39	chromosome 1 C14orf39 homolog [Source:VGNC Symbol;Acc:VGNC:85959]	54	82	76	19	17	38	-1.30609	1.26336	0.00110637
ENSSSCG00000013273	CHST1	carbohydrate sulfotransferase 1 [Source:VGNC Symbol;Acc:VGNC:86673]	81	175	86	49	45	25	-1.30671	1.93034	0.00180026
ENSSSCG00000013737	RNASEH2A	ribonuclease H2 subunit A [Source:VGNC Symbol;Acc:VGNC:92338]	62	64	92	27	19	30	-1.30781	1.30569	0.00042891
ENSSSCG00000026701	PHOSPHO1	nan	376	457	390	176	107	148	-1.30897	3.75701	6.32219e-06
ENSSSCG00000028282	SLC1A4	solute carrier family 1 member 4 [Source:VGNC Symbol;Acc:VGNC:92966]	165	205	95	86	44	36	-1.30949	2.4058	0.00370408
ENSSSCG00000015270	FMOD	fibromodulin [Source:HGNC Symbol;Acc:HGNC:3774]	440	418	200	223	39	120	-1.31213	3.59952	0.012452
ENSSSCG00000034765	PIEZO2	piezo type mechanosensitive ion channel component 2 [Source:HGNC Symbol;Acc:HGNC:26270]	108	126	43	41	21	38	-1.31505	1.68968	0.00849171
ENSSSCG00000013327	MPPED2	metallophosphoesterase domain containing 2 [Source:VGNC Symbol;Acc:VGNC:90331]	98	159	160	57	49	37	-1.31722	2.19454	6.451e-05
ENSSSCG00000011973	COL8A1	collagen type VIII alpha 1 chain [Source:VGNC Symbol;Acc:VGNC:86880]	184	108	114	106	16	23	-1.32184	2.2369	0.0350811
ENSSSCG00000005627	AK1	adenylate kinase 1 [Source:VGNC Symbol;Acc:VGNC:97875]	8322	10483	5912	2349	2899	3572	-1.32215	8.09788	3.44385e-06
ENSSSCG00000049640	nan	nan	64	131	201	43	35	54	-1.32281	2.08466	0.000725996
ENSSSCG00000012941	SLC29A2	solute carrier family 29 member 2 [Source:VGNC Symbol;Acc:VGNC:93043]	204	425	499	166	98	111	-1.3309	3.57656	4.61584e-05
ENSSSCG00000049456	nan	nan	60	476	552	65	212	74	-1.33714	3.4676	0.0209009
ENSSSCG00000004250	SLC35F1	solute carrier family 35 member F1 [Source:VGNC Symbol;Acc:VGNC:93081]	179	200	292	123	45	58	-1.33817	2.86767	0.000713648
ENSSSCG00000031261	RHOQ	ras homolog family member Q [Source:VGNC Symbol;Acc:VGNC:92292]	930	959	1066	379	305	338	-1.33873	5.01352	3.30039e-08
ENSSSCG00000010199	RET	ret proto-onco [Source:VGNC Symbol;Acc:VGNC:92220]	187	156	265	104	45	58	-1.34111	2.74148	0.000489294
ENSSSCG00000015326	COL1A2	collagen type I alpha 2 chain [Source:VGNC Symbol;Acc:VGNC:86871]	28332	18284	7782	11834	2539	5447	-1.3424	9.3079	0.0130961
ENSSSCG00000020735	MAP3K15	mitogen-activated protein kinase kinase kinase 15 [Source:VGNC Symbol;Acc:VGNC:89984]	152	534	315	92	149	92	-1.34349	3.40296	0.000399015
ENSSSCG00000006183	SBSPON	somatomedin B and thrombospondin type 1 domain containing [Source:VGNC Symbol;Acc:VGNC:92599]	170	160	142	86	28	49	-1.34937	2.40984	0.00159956
ENSSSCG00000036224	nan	nan	110	60	97	62	20	10	-1.35534	1.6181	0.0220779
ENSSSCG00000006415	CADM3	cell adhesion molecule 3 [Source:VGNC Symbol;Acc:VGNC:86135]	146	124	108	57	24	50	-1.36033	2.10285	0.000986265
ENSSSCG00000036428	nan	nan	101	156	120	21	78	29	-1.36596	2.05574	0.00274901
ENSSSCG00000006107	PDP1	pyruvate dehyrogenase phosphatase catalytic subunit 1 [Source:VGNC Symbol;Acc:VGNC:91286]	3600	5733	5035	1833	728	2225	-1.36635	7.25917	6.68051e-05
ENSSSCG00000004399	SLC22A16	solute carrier family 22 member 16 [Source:VGNC Symbol;Acc:VGNC:92976]	355	300	301	162	91	74	-1.37033	3.41137	0.000133313
ENSSSCG00000037430	COL6A6	collagen type VI alpha 6 chain [Source:HGNC Symbol;Acc:HGNC:27023]	491	283	72	188	42	77	-1.37197	3.32862	0.034678
ENSSSCG00000013374	KCNC1	potassium voltage-gated channel subfamily C member 1 [Source:VGNC Symbol;Acc:VGNC:89332]	68	210	184	36	52	61	-1.38038	2.28923	0.000467126
ENSSSCG00000012508	LOC100520992	armadillo repeat containing X-linked 6 [Source:HGNC Symbol;Acc:HGNC:26094]	73	63	92	34	16	26	-1.38069	1.36052	0.000573122
ENSSSCG00000022209	ITGB1BP2	integrin subunit beta 1 binding protein 2 [Source:VGNC Symbol;Acc:VGNC:98053]	802	919	643	216	320	269	-1.38681	4.69653	4.79532e-07
ENSSSCG00000007488	DOK5	docking protein 5 [Source:VGNC Symbol;Acc:VGNC:95768]	506	597	461	182	194	151	-1.38755	4.0954	2.78694e-07
ENSSSCG00000012018	CHODL	chondrolectin [Source:VGNC Symbol;Acc:VGNC:86655]	181	232	140	75	38	73	-1.3883	2.61629	0.000265475
ENSSSCG00000002140	KLHL33	kelch like family member 33 [Source:HGNC Symbol;Acc:HGNC:31952]	2083	2249	2223	701	299	1198	-1.38908	6.14943	0.000238579
ENSSSCG00000051491	nan	nan	62	70	77	30	14	25	-1.38987	1.23361	0.00043757
ENSSSCG00000033214	GNMT	glycine N-methyltransferase [Source:VGNC Symbol;Acc:VGNC:88542]	123	22	36	23	18	25	-1.40106	1.15486	0.0337153
ENSSSCG00000006774	PPM1J	protein phosphatase, Mg2+/Mn2+ dependent 1J [Source:VGNC Symbol;Acc:VGNC:91709]	965	1552	1563	392	389	544	-1.40261	5.42727	9.24816e-09
ENSSSCG00000038439	PRX	periaxin [Source:VGNC Symbol;Acc:VGNC:91891]	289	298	251	149	41	87	-1.4067	3.20514	0.000778183
ENSSSCG00000044764	nan	nan	111	46	88	30	24	29	-1.41336	1.49548	0.00190398
ENSSSCG00000011806	MASP1	mannan binding lectin serine peptidase 1 [Source:VGNC Symbol;Acc:VGNC:90032]	201	353	742	115	76	212	-1.41402	3.72958	0.000736455
ENSSSCG00000013243	DDB2	damage specific DNA binding protein 2 [Source:VGNC Symbol;Acc:VGNC:87203]	72	126	71	42	22	23	-1.41634	1.5751	0.000748161
ENSSSCG00000026516	EPHB3	EPH receptor B3 [Source:VGNC Symbol;Acc:VGNC:87738]	81	90	62	25	20	32	-1.42035	1.39846	0.000310747
ENSSSCG00000026232	FAM184B	family with sequence similarity 184 member B [Source:VGNC Symbol;Acc:VGNC:87938]	314	433	400	134	50	186	-1.42299	3.61858	0.000238615
ENSSSCG00000008294	ACTG2	actin gamma 2, smooth muscle [Source:VGNC Symbol;Acc:VGNC:85041]	104	557	118	92	89	64	-1.42352	3.03206	0.00726234
ENSSSCG00000000419	LOC100512656	retinol dehydrogenase 16 (all-trans) [Source:NCBI gene (formerly Entrezgene);Acc:100511633]	139	685	228	61	59	209	-1.43713	3.44956	0.00930256
ENSSSCG00000012375	DLG3	discs large MAGUK scaffold protein 3 [Source:VGNC Symbol;Acc:VGNC:87327]	45	71	65	30	14	13	-1.43751	1.01116	0.000948294
ENSSSCG00000022504	CDON	cell adhesion associated, onco regulated [Source:VGNC Symbol;Acc:VGNC:86519]	226	201	344	104	45	95	-1.44508	3.04487	8.30394e-05
ENSSSCG00000037140	nan	nan	135	392	614	134	103	106	-1.44513	3.52854	0.000198734
ENSSSCG00000010241	TET1	tet methylcytosine dioxygenase 1 [Source:VGNC Symbol;Acc:VGNC:93888]	254	254	271	79	55	117	-1.44802	3.07898	1.41627e-05
ENSSSCG00000031904	UGT8	UDP glycosyltransferase 8 [Source:VGNC Symbol;Acc:VGNC:98401]	168	97	106	73	10	39	-1.44901	2.0749	0.0135898
ENSSSCG00000035983	TPPP3	tubulin polymerization promoting protein family member 3 [Source:VGNC Symbol;Acc:VGNC:94346]	377	389	361	201	91	68	-1.45012	3.6113	0.000175235
ENSSSCG00000030026	SORCS1	sortilin related VPS10 domain containing receptor 1 [Source:VGNC Symbol;Acc:VGNC:93339]	72	60	89	37	13	20	-1.45121	1.30113	0.00119924
ENSSSCG00000027607	IER3	immediate early response 3 [Source:VGNC Symbol;Acc:VGNC:89027]	106	109	255	56	47	42	-1.45163	2.31013	0.000148487
ENSSSCG00000013263	CREB3L1	cAMP responsive element binding protein 3 like 1 [Source:VGNC Symbol;Acc:VGNC:86980]	105	126	75	34	17	48	-1.45226	1.77089	0.00100324
ENSSSCG00000011894	POPDC2	popeye domain containing 2 [Source:VGNC Symbol;Acc:VGNC:91667]	521	630	293	92	183	201	-1.45315	3.98519	9.70797e-05
ENSSSCG00000031311	LOC110258046	nan	167	123	344	36	72	91	-1.4551	2.74516	0.000584472
ENSSSCG00000027790	LOC100514323	nan	170	220	152	49	51	74	-1.45622	2.56257	1.46871e-05
ENSSSCG00000006982	ZDHHC2	zinc finger DHHC-type palmitoyltransferase 2 [Source:VGNC Symbol;Acc:VGNC:95886]	184	159	353	89	58	69	-1.45876	2.88015	4.41357e-05
ENSSSCG00000042575	nan	nan	86	109	193	60	22	36	-1.46534	2.03988	0.000643984
ENSSSCG00000028552	BHLHE41	basic helix-loop-helix family member e41 [Source:VGNC Symbol;Acc:VGNC:85815]	564	339	347	165	63	181	-1.47327	3.79962	0.00042156
ENSSSCG00000047225	nan	nan	64	42	96	38	9	15	-1.48063	1.16165	0.00709393
ENSSSCG00000009489	GPC6	glypican 6 [Source:HGNC Symbol;Acc:HGNC:4454]	85	83	31	36	8	20	-1.48268	1.19621	0.0139263
ENSSSCG00000006082	MATN2	matrilin 2 [Source:VGNC Symbol;Acc:VGNC:90043]	650	648	513	298	101	171	-1.48601	4.29385	6.54073e-05
ENSSSCG00000009751	FZD10	frizzled class receptor 10 [Source:VGNC Symbol;Acc:VGNC:88279]	86	95	337	71	24	56	-1.49055	2.40586	0.00445921
ENSSSCG00000027525	DHCR24	24-dehydrocholesterol reductase [Source:NCBI gene (formerly Entrezgene);Acc:100628197]	321	329	368	102	75	140	-1.49212	3.44412	9.61069e-07
ENSSSCG00000021811	GDPD3	glycerophosphodiester phosphodiesterase domain containing 3 [Source:VGNC Symbol;Acc:VGNC:88408]	29	96	66	15	16	26	-1.49573	1.04269	0.00124766
ENSSSCG00000009134	EGF	epidermal growth factor [Source:VGNC Symbol;Acc:VGNC:98921]	1424	1262	493	187	213	643	-1.49788	5.14385	0.00218765
ENSSSCG00000007477	NFATC2	nuclear factor of activated T cells 2 [Source:VGNC Symbol;Acc:VGNC:96440]	128	209	107	56	28	53	-1.4985	2.26464	0.000220265
ENSSSCG00000000759	WNT5B	Wnt family member 5B [Source:HGNC Symbol;Acc:HGNC:16265]	69	112	113	48	11	29	-1.49991	1.65748	0.00153552
ENSSSCG00000006352	MPZ	myelin protein zero [Source:VGNC Symbol;Acc:VGNC:90334]	4271	2393	2407	1782	430	673	-1.50786	6.65062	0.00141362
ENSSSCG00000036446	PALD1	phosphatase domain containing paladin 1 [Source:VGNC Symbol;Acc:VGNC:91159]	85	167	105	36	29	43	-1.50906	1.93444	3.84752e-05
ENSSSCG00000014362	HBEGF	heparin binding EGF like growth factor [Source:VGNC Symbol;Acc:VGNC:88792]	1084	1080	867	503	254	181	-1.50981	5.02695	3.14804e-05
ENSSSCG00000025822	SFRP1	secreted frizzled related protein 1 [Source:VGNC Symbol;Acc:VGNC:95493]	163	192	152	72	36	47	-1.51585	2.45423	3.47483e-05
ENSSSCG00000028905	TNIK	TRAF2 and NCK interacting kinase [Source:VGNC Symbol;Acc:VGNC:98381]	919	1096	1456	539	197	298	-1.51684	5.17226	6.59507e-06
ENSSSCG00000011599	GRIP2	glutamate receptor interacting protein 2 [Source:VGNC Symbol;Acc:VGNC:88691]	809	1108	1167	296	166	467	-1.51862	5.00461	2.57447e-06
ENSSSCG00000039704	nan	nan	42	74	70	25	13	17	-1.52342	1.01979	0.000191988
ENSSSCG00000046877	nan	nan	25	95	85	13	3	43	-1.52746	1.11632	0.0295717
ENSSSCG00000036062	RNF122	ring finger protein 122 [Source:VGNC Symbol;Acc:VGNC:92350]	365	274	141	99	45	104	-1.52877	3.12429	0.000877139
ENSSSCG00000040205	TLCD2	TLC domain containing 2 [Source:VGNC Symbol;Acc:VGNC:94011]	192	317	280	78	80	77	-1.53014	3.04562	6.90042e-08
ENSSSCG00000034821	ARMCX4	armadillo repeat containing X-linked 4 [Source:HGNC Symbol;Acc:HGNC:28615]	179	187	171	49	49	66	-1.53051	2.53406	1.72256e-06
ENSSSCG00000015583	SMYD2	SET and MYND domain containing 2 [Source:VGNC Symbol;Acc:VGNC:93273]	1661	1334	842	459	267	477	-1.53662	5.39342	1.36532e-05
ENSSSCG00000032889	ASB12	ankyrin repeat and SOCS box containing 12 [Source:VGNC Symbol;Acc:VGNC:85561]	638	808	1085	262	225	259	-1.54047	4.70661	2.96478e-10
ENSSSCG00000040053	LSMEM1	leucine rich single-pass membrane protein 1 [Source:VGNC Symbol;Acc:VGNC:89878]	571	456	454	184	96	174	-1.5406	3.99896	3.22311e-06
ENSSSCG00000001683	POLH	DNA polymerase eta [Source:VGNC Symbol;Acc:VGNC:91635]	931	1899	1049	361	446	340	-1.54914	5.32775	4.05063e-08
ENSSSCG00000021576	CD83	CD83 molecule [Source:VGNC Symbol;Acc:VGNC:86433]	107	98	141	48	8	46	-1.55128	1.89445	0.00288068
ENSSSCG00000004803	ACTC1	actin alpha cardiac muscle 1 [Source:VGNC Symbol;Acc:VGNC:85040]	1559	6236	5926	1377	1702	779	-1.55233	7.07972	5.84621e-05
ENSSSCG00000015040	PTS	6-pyruvoyltetrahydropterin synthase [Source:HGNC Symbol;Acc:HGNC:9689]	110	66	19	27	22	13	-1.56219	1.19235	0.0150583
ENSSSCG00000030113	SHISA2	shisa family member 2 [Source:VGNC Symbol;Acc:VGNC:92845]	1206	1701	609	177	384	512	-1.56366	5.23117	0.000136857
ENSSSCG00000038323	ACTN3	actinin alpha 3 [Source:VGNC Symbol;Acc:VGNC:96785]	16531	24676	7036	3392	4833	6462	-1.56487	9.00792	8.00135e-05
ENSSSCG00000006857	COL11A1	collagen type XI alpha 1 chain [Source:VGNC Symbol;Acc:VGNC:86862]	180	166	86	91	10	27	-1.5859	2.25057	0.0139163
ENSSSCG00000047852	nan	nan	1118	543	1635	455	256	242	-1.5861	5.10227	3.21741e-05
ENSSSCG00000021232	SYNC	syncoilin, intermediate filament protein [Source:VGNC Symbol;Acc:VGNC:93660]	564	603	742	276	91	181	-1.58631	4.31071	6.54905e-06
ENSSSCG00000036441	PMP2	peripheral myelin protein 2 [Source:NCBI gene (formerly Entrezgene);Acc:100151890]	992	321	337	230	159	131	-1.58786	4.22845	0.000860153
ENSSSCG00000008842	KIT	KIT proto-onco, receptor tyrosine kinase [Source:VGNC Symbol;Acc:VGNC:98060]	106	286	67	58	37	36	-1.59605	2.27564	0.00172426
ENSSSCG00000017448	KRT19	keratin 14 [Source:HGNC Symbol;Acc:HGNC:6416]	99	45	62	41	8	12	-1.60159	1.22038	0.0105813
ENSSSCG00000024015	FADS1	fatty acid desaturase 1 [Source:VGNC Symbol;Acc:VGNC:87875]	539	478	341	170	136	94	-1.6071	3.86705	3.11166e-06
ENSSSCG00000025777	ESR1	estrogen receptor 1 [Source:VGNC Symbol;Acc:VGNC:103089]	91	160	128	46	22	38	-1.61272	1.99038	1.88118e-05
ENSSSCG00000023031	TNNT2	troponin T2, cardiac type [Source:VGNC Symbol;Acc:VGNC:95549]	176	167	319	117	32	33	-1.61833	2.77175	0.00104218
ENSSSCG00000008768	ARAP2	ArfGAP with RhoGAP domain, ankyrin repeat and PH domain 2 [Source:VGNC Symbol;Acc:VGNC:85440]	158	104	66	57	14	25	-1.63476	1.87101	0.00370943
ENSSSCG00000005970	SQLE	squalene epoxidase [Source:VGNC Symbol;Acc:VGNC:93444]	195	115	92	61	22	35	-1.6355	2.15697	0.00106741
ENSSSCG00000005385	NR4A3	nuclear receptor subfamily 4 group A member 3 [Source:VGNC Symbol;Acc:VGNC:90885]	11	241	80	26	38	22	-1.65847	1.7328	0.0206559
ENSSSCG00000031300	BEND5	nan	264	226	424	99	65	84	-1.66658	3.2289	3.40638e-07
ENSSSCG00000002029	LOC100736765	myosin heavy chain 7 [Source:NCBI gene (formerly Entrezgene);Acc:396860]	255811	305263	357602	146963	65191	34736	-1.6684	13.186	3.90001e-05
ENSSSCG00000032698	TPPP	tubulin polymerization promoting protein [Source:VGNC Symbol;Acc:VGNC:94344]	276	469	467	139	86	99	-1.67015	3.61487	1.60141e-08
ENSSSCG00000025810	KCNAB1	potassium voltage-gated channel subfamily A member regulatory beta subunit 1 [Source:VGNC Symbol;Acc:VGNC:89328]	635	518	1446	288	179	222	-1.67269	4.69738	1.18356e-06
ENSSSCG00000013375	MYOD1	myogenic differentiation 1 [Source:VGNC Symbol;Acc:VGNC:90537]	385	734	237	160	83	126	-1.68374	3.81172	3.72191e-05
ENSSSCG00000028172	FAM78A	family with sequence similarity 78 member A [Source:VGNC Symbol;Acc:VGNC:87984]	556	736	572	183	110	213	-1.68623	4.26071	1.45627e-08
ENSSSCG00000024681	TECRL	trans-2,3-enoyl-CoA reductase like [Source:VGNC Symbol;Acc:VGNC:93859]	3500	1569	3355	1359	651	306	-1.68909	6.46646	0.000318786
ENSSSCG00000036136	BHLHE40	basic helix-loop-helix family member e40 [Source:VGNC Symbol;Acc:VGNC:85814]	2320	1081	793	474	294	451	-1.69287	5.52988	6.74413e-05
ENSSSCG00000004736	SPTBN5	spectrin beta, non-erythrocytic 5 [Source:VGNC Symbol;Acc:VGNC:103183]	86	74	80	25	12	28	-1.7013	1.3708	4.52734e-05
ENSSSCG00000003160	NTF4	neurotrophin 4 [Source:VGNC Symbol;Acc:VGNC:98163]	199	249	287	77	43	74	-1.70587	2.90958	1.08405e-07
ENSSSCG00000030303	ACHE	acetylcholinesterase [Source:VGNC Symbol;Acc:VGNC:97029]	92	111	48	27	5	36	-1.71612	1.44314	0.00396656
ENSSSCG00000015618	LAMB3	laminin subunit beta 3 [Source:VGNC Symbol;Acc:VGNC:89622]	222	373	82	96	26	59	-1.72207	2.8321	0.00216178
ENSSSCG00000036569	PTP4A3	protein tyrosine phosphatase 4A3 [Source:VGNC Symbol;Acc:VGNC:91968]	14832	18225	16233	5952	2530	4445	-1.72773	8.96655	1.6571e-08
ENSSSCG00000025996	MTUS2	microtubule associated scaffold protein 2 [Source:VGNC Symbol;Acc:VGNC:90477]	223	299	550	136	62	72	-1.73022	3.40683	4.6023e-06
ENSSSCG00000028572	PER3	nan	105	275	115	48	37	42	-1.73963	2.33529	2.76218e-05
ENSSSCG00000003159	KCNA7	potassium voltage-gated channel subfamily A member 7 [Source:VGNC Symbol;Acc:VGNC:89327]	568	857	851	164	150	272	-1.74395	4.50909	4.38809e-10
ENSSSCG00000006141	CA3	carbonic anhydrase 3 [Source:VGNC Symbol;Acc:VGNC:86099]	142942	47300	44132	43998	11108	10582	-1.74441	11.3408	0.0034827
ENSSSCG00000026111	nan	nan	336	479	438	146	69	104	-1.75662	3.66082	2.93497e-08
ENSSSCG00000007288	MYH7B	myosin heavy chain 7B [Source:VGNC Symbol;Acc:VGNC:95701]	2887	5772	10291	2455	1214	915	-1.75897	7.50067	9.94096e-06
ENSSSCG00000041958	nan	nan	141	274	386	70	41	86	-1.76515	2.97546	2.31215e-06
ENSSSCG00000015584	PROX1	prospero homeobox 1 [Source:VGNC Symbol;Acc:VGNC:91837]	99	160	264	65	30	33	-1.76559	2.37614	2.24832e-05
ENSSSCG00000024061	TNNI1	troponin I1, slow skeletal type [Source:VGNC Symbol;Acc:VGNC:95548]	71377	53110	81615	30173	11326	11047	-1.77168	11.0319	3.97097e-06
ENSSSCG00000001806	FSD2	fibronectin type III and SPRY domain containing 2 [Source:VGNC Symbol;Acc:VGNC:88253]	2398	2540	3369	947	268	862	-1.78437	6.37458	2.30726e-06
ENSSSCG00000037562	SLC2A4RG	SLC2A4 regulator [Source:VGNC Symbol;Acc:VGNC:95715]	308	397	267	109	54	83	-1.791	3.31494	2.4944e-07
ENSSSCG00000010493	PDLIM1	PDZ and LIM domain 1 [Source:VGNC Symbol;Acc:VGNC:91281]	3250	2179	3295	948	752	524	-1.79626	6.47766	3.44806e-09
ENSSSCG00000007485	BCAS1	brain enriched myelin associated protein 1 [Source:VGNC Symbol;Acc:VGNC:98872]	124	102	62	27	12	36	-1.79684	1.63494	0.000307268
ENSSSCG00000015595	ATF3	activating transcription factor 3 [Source:VGNC Symbol;Acc:VGNC:85606]	488	2796	1622	310	510	353	-1.79726	5.54458	1.36767e-05
ENSSSCG00000031905	KCNS3	potassium voltage-gated channel modifier subfamily S member 3 [Source:VGNC Symbol;Acc:VGNC:89387]	127	102	129	29	15	46	-1.81122	1.90152	2.42413e-05
ENSSSCG00000006556	TPM3	tropomyosin 3 [Source:VGNC Symbol;Acc:VGNC:98877]	93296	67136	108969	36370	18297	10540	-1.84783	11.4006	2.73489e-06
ENSSSCG00000016338	PER2	period circadian regulator 2 [Source:VGNC Symbol;Acc:VGNC:96478]	278	1129	455	126	162	144	-1.8665	4.16717	1.89208e-06
ENSSSCG00000003414	ANGPTL7	angiopoietin like 7 [Source:VGNC Symbol;Acc:VGNC:85309]	137	66	68	47	6	13	-1.89464	1.54961	0.00457601
ENSSSCG00000024954	FGF1	fibroblast growth factor 1 [Source:VGNC Symbol;Acc:VGNC:88100]	354	650	912	197	93	136	-1.90682	4.19231	1.746e-08
ENSSSCG00000000917	KERA	keratocan [Source:VGNC Symbol;Acc:VGNC:89420]	470	131	121	102	18	63	-1.91073	2.98908	0.00390129
ENSSSCG00000003148	DBP	D-box binding PAR bZIP transcription factor [Source:VGNC Symbol;Acc:VGNC:87167]	256	186	107	69	21	41	-1.93058	2.53067	0.000160392
ENSSSCG00000033958	RYR3	ryanodine receptor 3 [Source:HGNC Symbol;Acc:HGNC:10485]	376	332	96	81	68	45	-1.93225	3.08043	0.000133915
ENSSSCG00000034858	RAP1GAP2	RAP1 GTPase activating protein 2 [Source:VGNC Symbol;Acc:VGNC:92086]	122	199	150	46	20	39	-1.94756	2.23078	3.99195e-07
ENSSSCG00000050094	nan	nan	50	66	83	17	7	20	-1.9479	1.0255	7.16795e-06
ENSSSCG00000031616	FOSB	FosB proto-onco, AP-1 transcription factor subunit [Source:VGNC Symbol;Acc:VGNC:88190]	218	253	69	36	24	67	-1.95132	2.48752	0.00030792
ENSSSCG00000046937	nan	nan	47	117	44	20	7	19	-1.95224	1.09229	0.000264685
ENSSSCG00000035299	SFRP4	secreted frizzled related protein 4 [Source:VGNC Symbol;Acc:VGNC:92776]	796	304	426	211	64	84	-1.96218	3.99776	9.13717e-05
ENSSSCG00000017343	GFAP	glial fibrillary acidic protein [Source:VGNC Symbol;Acc:VGNC:88419]	72	56	99	30	11	9	-1.96383	1.22041	0.00010081
ENSSSCG00000021084	S100A6	S100 calcium binding protein A6 [Source:VGNC Symbol;Acc:VGNC:92545]	237	213	240	70	39	46	-1.96553	2.79377	1.58374e-08
ENSSSCG00000011325	MYL3	myosin light chain 3 [Source:VGNC Symbol;Acc:VGNC:90515]	51937	40277	62890	22107	7106	5100	-1.96555	10.5748	1.39144e-05
ENSSSCG00000011646	KY	kyphoscoliosis peptidase [Source:VGNC Symbol;Acc:VGNC:89609]	2412	2448	1361	574	230	587	-2.00458	5.96652	1.93582e-07
ENSSSCG00000000252	KRT8	keratin 8 [Source:VGNC Symbol;Acc:VGNC:89596]	256	136	146	83	10	27	-2.01263	2.48268	0.00130023
ENSSSCG00000010947	FBP2	fructose-bisphosphatase 2 [Source:NCBI gene (formerly Entrezgene);Acc:100134828]	3827	5349	1845	216	569	1661	-2.03058	6.77457	0.00030931
ENSSSCG00000003662	NT5C1A	5'-nucleotidase, cytosolic IA [Source:VGNC Symbol;Acc:VGNC:90919]	3451	4692	4083	1033	679	862	-2.04222	6.8815	7.92715e-16
ENSSSCG00000031053	S100A1	S100 calcium binding protein A1 [Source:VGNC Symbol;Acc:VGNC:92535]	479	294	293	110	61	60	-2.06243	3.43856	2.1438e-07
ENSSSCG00000039271	ST8SIA2	ST8 alpha-N-acetyl-neuraminide alpha-2,8-sialyltransferase 2 [Source:VGNC Symbol;Acc:VGNC:93517]	233	260	231	53	17	82	-2.06294	2.83795	5.2356e-06
ENSSSCG00000033532	LOC100621492	SH3 domain binding kinase family member 2 [Source:HGNC Symbol;Acc:HGNC:34416]	29	107	397	42	33	24	-2.08776	2.26805	0.00137124
ENSSSCG00000047759	nan	nan	153	140	145	32	25	33	-2.101	2.12823	1.97317e-09
ENSSSCG00000028277	LOC100521789	nan	119	46	230	27	25	27	-2.10162	1.9472	4.66671e-05
ENSSSCG00000025353	TNNT1	troponin T1, slow skeletal type [Source:VGNC Symbol;Acc:VGNC:94284]	95664	68053	107787	31310	13003	9122	-2.14676	11.355	1.59579e-07
ENSSSCG00000035965	AQP4	aquaporin 4 [Source:VGNC Symbol;Acc:VGNC:85432]	5057	4219	3513	426	1200	934	-2.1847	6.96882	9.10287e-10
ENSSSCG00000044722	LOC102158612	nan	205	38	16	18	27	12	-2.18576	1.52846	0.00826954
ENSSSCG00000005928	MROH5	maestro heat like repeat family member 5 (gene/pseudogene) [Source:HGNC Symbol;Acc:HGNC:42976]	107	404	338	36	62	57	-2.19173	2.96234	1.08998e-07
ENSSSCG00000010639	HABP2	hyaluronan binding protein 2 [Source:NCBI gene (formerly Entrezgene);Acc:100157966]	102	707	201	65	83	34	-2.21059	3.21366	8.45799e-05
ENSSSCG00000048201	nan	nan	104	60	147	22	6	30	-2.21872	1.61272	3.84413e-05
ENSSSCG00000040860	NMRK2	nicotinamide riboside kinase 2 [Source:VGNC Symbol;Acc:VGNC:90801]	2468	3161	1839	236	386	794	-2.23801	6.16181	7.15226e-09
ENSSSCG00000014437	PPARGC1B	PPARG coactivator 1 beta [Source:VGNC Symbol;Acc:VGNC:91686]	397	1095	582	127	100	145	-2.24648	4.26181	2.39558e-11
ENSSSCG00000039710	MYL2	myosin light chain 2 [Source:VGNC Symbol;Acc:VGNC:90514]	134682	76490	120645	38205	16005	7573	-2.24819	11.65	2.8816e-06
ENSSSCG00000029537	nan	nan	164	364	289	43	29	71	-2.27977	2.92455	2.19911e-09
ENSSSCG00000047720	LOC106504252	nan	6	23	585	26	41	30	-2.2904	2.39522	0.0233859
ENSSSCG00000031321	nan	nan	1865	4839	905	220	199	950	-2.29117	6.15808	0.000151073
ENSSSCG00000010481	LGI1	leucine rich glioma inactivated 1 [Source:HGNC Symbol;Acc:HGNC:6572]	226	123	221	63	12	23	-2.35243	2.46883	1.80716e-05
ENSSSCG00000037433	C13H3orf18	chromosome 13 C3orf18 homolog [Source:VGNC Symbol;Acc:VGNC:85932]	90	77	192	20	11	27	-2.39201	1.75321	2.26323e-07
ENSSSCG00000016823	C1QTNF3	C1q and TNF related 3 [Source:NCBI gene (formerly Entrezgene);Acc:100270814]	520	201	103	110	12	25	-2.3998	3.08604	0.00151099
ENSSSCG00000020771	INHA	inhibin subunit alpha [Source:VGNC Symbol;Acc:VGNC:96372]	55	135	88	17	5	22	-2.41674	1.39616	1.68416e-06
ENSSSCG00000034993	NREP	neuronal regeneration related protein [Source:HGNC Symbol;Acc:HGNC:16834]	7828	4837	8040	2006	507	827	-2.44237	7.60351	3.66206e-08
ENSSSCG00000016900	ESM1	endothelial cell specific molecule 1 [Source:VGNC Symbol;Acc:VGNC:87789]	118	48	81	20	10	11	-2.4424	1.31129	4.5751e-06
ENSSSCG00000010554	SCD	stearoyl-CoA desaturase [Source:NCBI gene (formerly Entrezgene);Acc:396670]	618	246	278	77	24	92	-2.46173	3.50378	3.2775e-06
ENSSSCG00000004094	PPP1R14C	protein phosphatase 1 regulatory inhibitor subunit 14C [Source:VGNC Symbol;Acc:VGNC:91724]	716	670	877	204	44	106	-2.46441	4.3899	9.63711e-09
ENSSSCG00000011441	TNNC1	troponin C1, slow skeletal and cardiac type [Source:VGNC Symbol;Acc:VGNC:94282]	75808	48427	78846	17189	7864	7089	-2.47407	10.89	4.53295e-11
ENSSSCG00000033100	nan	nan	262	76	462	42	42	35	-2.54017	2.88099	1.21905e-06
ENSSSCG00000035667	KBTBD13	kelch repeat and BTB domain containing 13 [Source:VGNC Symbol;Acc:VGNC:89316]	232	86	215	46	3	27	-2.63582	2.34403	0.000109822
ENSSSCG00000037539	SORCS2	sortilin related VPS10 domain containing receptor 2 [Source:VGNC Symbol;Acc:VGNC:93340]	54	111	99	10	7	18	-2.67358	1.28792	1.43894e-09
ENSSSCG00000015617	G0S2	G0/G1 switch 2 [Source:VGNC Symbol;Acc:VGNC:88286]	53	53	225	27	4	10	-2.70182	1.55733	8.49119e-05
ENSSSCG00000038607	GADL1	glutamate decarboxylase like 1 [Source:VGNC Symbol;Acc:VGNC:88319]	2165	1675	688	128	182	329	-2.72536	5.43097	3.5422e-09
ENSSSCG00000039506	MYL6	myosin light chain 6 [Source:NCBI gene (formerly Entrezgene);Acc:396807]	25062	11285	15389	3842	1944	1200	-2.75281	8.9287	1.50403e-09
ENSSSCG00000036613	POLQ	DNA polymerase theta [Source:VGNC Symbol;Acc:VGNC:91641]	119	181	41	25	5	12	-2.83809	1.68528	1.40184e-05
ENSSSCG00000012667	IGSF1	immunoglobulin superfamily member 1 [Source:VGNC Symbol;Acc:VGNC:89062]	234	282	225	43	10	36	-2.85775	2.7502	2.07959e-10
ENSSSCG00000004218	RSPO3	R-spondin 3 [Source:VGNC Symbol;Acc:VGNC:92485]	421	257	457	60	47	31	-2.85855	3.36789	4.42041e-14
ENSSSCG00000010464	PPP1R3C	protein phosphatase 1 regulatory subunit 3C [Source:VGNC Symbol;Acc:VGNC:91737]	6403	5222	2003	492	229	976	-2.89563	6.99482	3.8813e-08
ENSSSCG00000018701	MIR378-1	ssc-mir-378-1 [Source:miRBase;Acc:MI0013088]	72	81	106	10	8	11	-2.93562	1.2505	4.01674e-13
ENSSSCG00000030706	FAM43B	family with sequence similarity 43 member B [Source:VGNC Symbol;Acc:VGNC:87971]	116	82	156	33	4	2	-2.94582	1.6941	6.74226e-05
ENSSSCG00000026478	PADI2	peptidyl arginine deiminase 2 [Source:VGNC Symbol;Acc:VGNC:91146]	20	199	211	21	7	10	-3.16607	1.84577	5.04593e-06
ENSSSCG00000050060	nan	nan	128	187	62	7	2	15	-3.79133	1.73496	1.11846e-09
ENSSSCG00000007680	MYL10	myosin light chain 10 [Source:VGNC Symbol;Acc:VGNC:90513]	2	88	206	14	1	1	-3.79906	1.25805	0.00105867
ENSSSCG00000035760	RFLNA	refilin A [Source:VGNC Symbol;Acc:VGNC:92238]	243	97	314	14	13	13	-3.83999	2.49131	1.53253e-14
ENSSSCG00000011324	nan	nan	77	170	173	10	8	3	-4.0527	1.80171	1.01352e-17
ENSSSCG00000043557	nan	nan	172	119	122	11	4	4	-4.26156	1.85061	1.79702e-16
ENSSSCG00000036157	BARX2	BARX homeobox 2 [Source:VGNC Symbol;Acc:VGNC:85758]	381	261	214	26	8	4	-4.33167	2.8905	5.79909e-14
ENSSSCG00000040140	CD3E	CD3e molecule [Source:VGNC Symbol;Acc:VGNC:86414]	33	11	361	5	2	2	-5.09334	1.63993	2.28661e-06

## Sheet: DEGs of BP_RT vs BP_CD
Supplementary Table 2-2: DEGs of BP_RT vs BP_CD
Ensembl ID	Gene name	Description	BP_RT1	BP_RT2	BP_RT3	BP_CD1	BP_CD2	BP_CD3	logFC	logCPM	PValue
ENSSSCG00000013916	COMP	cartilage oligomeric matrix protein [Source:VGNC Symbol;Acc:VGNC:86892]	1	18	1	610	768	4	5.83256	3.33531	7.14789e-06
ENSSSCG00000013934	CILP2	cartilage intermediate layer protein 2 [Source:VGNC Symbol;Acc:VGNC:86704]	1	11	0	255	485	3	5.6137	2.4242	1.26598e-05
ENSSSCG00000001473	COL11A2	collagen type XI alpha 2 chain [Source:VGNC Symbol;Acc:VGNC:86863]	15	32	12	813	749	24	4.50221	3.60334	1.14943e-07
ENSSSCG00000029449	PRG4	nan	16	6	15	164	649	37	4.12612	2.62364	7.85418e-08
ENSSSCG00000009216	SPP1	secreted phosphoprotein 1 [Source:VGNC Symbol;Acc:VGNC:93419]	37	36	12	114	1624	19	3.9155	3.58537	9.23119e-05
ENSSSCG00000007082	OTOR	nan	9	8	6	216	84	9	3.55976	1.42737	3.62348e-05
ENSSSCG00000032241	GPNMB	glycoprotein nmb [Source:VGNC Symbol;Acc:VGNC:88593]	55	104	87	126	3003	49	3.23118	4.47352	0.000559299
ENSSSCG00000005938	COL22A1	collagen type XXII alpha 1 chain [Source:VGNC Symbol;Acc:VGNC:97937]	13	15	3	115	240	3	3.18875	1.51932	0.00102232
ENSSSCG00000014799	nan	nan	23	21	14	196	215	139	3.05822	2.26593	5.35847e-14
ENSSSCG00000011133	PFKFB3	6-phosphofructo-2-kinase/fructose-2,6-biphosphatase 3 [Source:VGNC Symbol;Acc:VGNC:96480]	305	198	1225	3814	8228	2985	2.84872	6.95657	2.16831e-07
ENSSSCG00000039651	SLC2A5	solute carrier family 2 member 5 [Source:VGNC Symbol;Acc:VGNC:93050]	25	43	13	84	604	60	2.83025	2.53678	5.76792e-05
ENSSSCG00000040638	DIO2	iodothyronine deiodinase 2 [Source:NCBI gene (formerly Entrezgene);Acc:414379]	893	101	35	2830	3672	1766	2.78022	6.14913	0.000387093
ENSSSCG00000040581	CISH	cytokine inducible SH2 containing protein [Source:VGNC Symbol;Acc:VGNC:86709]	500	58	382	5031	1935	231	2.74779	5.99434	0.000788696
ENSSSCG00000003414	ANGPTL7	angiopoietin like 7 [Source:VGNC Symbol;Acc:VGNC:85309]	43	32	4	304	310	15	2.73428	2.42149	0.00150915
ENSSSCG00000050502	nan	nan	14	3	33	147	76	83	2.4632	1.56914	0.000254025
ENSSSCG00000025523	COL2A1	collagen type II alpha 1 chain [Source:VGNC Symbol;Acc:VGNC:86874]	8	29	0	110	129	4	2.46041	1.12452	0.0222767
ENSSSCG00000007760	PRSS36	serine protease 36 [Source:HGNC Symbol;Acc:HGNC:26906]	47	34	61	230	772	17	2.45769	3.03246	0.0014359
ENSSSCG00000015353	SCIN	scinderin [Source:NCBI gene (formerly Entrezgene);Acc:100512981]	11	23	6	88	146	18	2.37623	1.17662	0.00042285
ENSSSCG00000006578	S100A4	S100 calcium binding protein A4 [Source:VGNC Symbol;Acc:VGNC:92543]	19	9	8	25	216	8	2.3559	1.05584	0.00704018
ENSSSCG00000022256	DEPP1	DEPP1 autophagy regulator [Source:VGNC Symbol;Acc:VGNC:87259]	160	114	224	1635	727	325	2.26841	4.66161	3.07935e-06
ENSSSCG00000038429	nan	nan	95	27	84	282	222	517	2.21562	3.35897	2.51979e-05
ENSSSCG00000005981	FBXO32	F-box protein 32 [Source:VGNC Symbol;Acc:VGNC:88039]	9812	481	5269	19330	40612	18994	2.08649	9.48658	0.00162163
ENSSSCG00000005055	LGALS3	galectin 3 [Source:VGNC Symbol;Acc:VGNC:89694]	153	93	55	219	1340	89	2.05587	3.76556	0.00171933
ENSSSCG00000012480	TNMD	tenomodulin [Source:VGNC Symbol;Acc:VGNC:94281]	32	54	8	275	168	3	2.04602	2.08622	0.0320044
ENSSSCG00000008239	CAPG	capping actin protein, gelsolin like [Source:VGNC Symbol;Acc:VGNC:86169]	65	75	33	137	752	40	2.03666	2.9553	0.00312163
ENSSSCG00000008648	RSAD2	radical S-adenosyl methionine domain containing 2 [Source:VGNC Symbol;Acc:VGNC:92472]	173	182	145	297	843	1108	2.03235	4.46489	1.27937e-06
ENSSSCG00000022089	ADGRF2	adhesion G protein-coupled receptor F4 [Source:VGNC Symbol;Acc:VGNC:85128]	234	171	23	318	1674	220	2.01345	4.22677	0.00323536
ENSSSCG00000007043	GPCPD1	glycerophosphocholine phosphodiesterase 1 [Source:VGNC Symbol;Acc:VGNC:96148]	1983	1276	1390	4079	11227	6435	1.99619	7.65291	2.9698e-10
ENSSSCG00000040145	SNAI3	snail family transcriptional repressor 3 [Source:VGNC Symbol;Acc:VGNC:93276]	177	105	86	431	1385	73	1.99452	4.00466	0.00139321
ENSSSCG00000008261	HK2	hexokinase 2 [Source:VGNC Symbol;Acc:VGNC:98034]	1093	521	171	1457	6668	913	1.98451	6.26271	0.00112415
ENSSSCG00000037527	CPLX1	complexin 1 [Source:VGNC Symbol;Acc:VGNC:86943]	49	30	6	133	209	53	1.95938	1.89497	0.0016824
ENSSSCG00000004573	LOC100152206	nan	41	7	9	74	187	18	1.9463	1.35497	0.0112219
ENSSSCG00000021084	S100A6	S100 calcium binding protein A6 [Source:VGNC Symbol;Acc:VGNC:92545]	100	60	66	209	817	66	1.90351	3.23983	0.00128968
ENSSSCG00000013551	C3	complement C3 [Source:VGNC Symbol;Acc:VGNC:99600]	323	172	78	546	1377	498	1.81563	4.49498	3.90426e-05
ENSSSCG00000007073	ISM1	isthmin 1 [Source:VGNC Symbol;Acc:VGNC:95787]	47	51	30	122	363	69	1.80769	2.35035	0.00028541
ENSSSCG00000022945	UCHL1	ubiquitin C-terminal hydrolase L1 [Source:VGNC Symbol;Acc:VGNC:94680]	42	43	82	197	488	50	1.80672	2.73613	0.00177332
ENSSSCG00000034351	B3GALT1	beta-1,3-galactosyltransferase 1 [Source:VGNC Symbol;Acc:VGNC:96494]	90	43	15	213	166	184	1.78956	2.54152	0.000910467
ENSSSCG00000001849	ANPEP	alanyl aminopeptidase, membrane [Source:VGNC Symbol;Acc:VGNC:85362]	192	51	70	223	362	591	1.78535	3.6135	0.000611103
ENSSSCG00000040575	ISG15	ISG15 ubiquitin like modifier [Source:VGNC Symbol;Acc:VGNC:89223]	76	83	71	185	319	368	1.77686	3.15455	2.63522e-06
ENSSSCG00000036948	IGFN1	immunoglobulin like and fibronectin type III domain containing 1 [Source:VGNC Symbol;Acc:VGNC:96049]	1500	3240	1353	7944	10308	5409	1.76979	7.84506	5.39947e-08
ENSSSCG00000042227	nan	nan	59	40	92	510	108	72	1.728	2.86291	0.00826123
ENSSSCG00000013556	ADGRE1	adhesion G protein-coupled receptor E1 [Source:VGNC Symbol;Acc:VGNC:85124]	16	17	22	14	198	20	1.66876	1.09713	0.0296482
ENSSSCG00000002953	C6H19orf33	nan	25	20	37	115	135	51	1.65141	1.61619	0.000341712
ENSSSCG00000039413	SLC9A3	solute carrier family 9 member A3 [Source:VGNC Symbol;Acc:VGNC:93183]	59	22	18	257	18	49	1.62948	1.85587	0.0496353
ENSSSCG00000009488	SLITRK5	SLIT and NTRK like family member 5 [Source:VGNC Symbol;Acc:VGNC:93210]	21	39	65	177	115	125	1.60253	2.16249	0.000850396
ENSSSCG00000042043	nan	nan	25	17	19	52	44	101	1.59768	1.15698	0.00304809
ENSSSCG00000017705	CCL5	C-C motif chemokine ligand 5 [Source:NCBI gene (formerly Entrezgene);Acc:396613]	66	29	23	54	350	54	1.59075	2.08829	0.0136412
ENSSSCG00000038521	CHAC1	ChaC glutathione specific gamma-glutamylcyclotransferase 1 [Source:VGNC Symbol;Acc:VGNC:86619]	165	62	43	331	501	131	1.5748	3.24152	0.00199877
ENSSSCG00000038186	TIGD4	tigger transposable element derived 4 [Source:VGNC Symbol;Acc:VGNC:93983]	29	69	44	171	272	58	1.56438	2.30693	0.00154607
ENSSSCG00000022849	IL2RA	interleukin 2 receptor subunit alpha [Source:NCBI gene (formerly Entrezgene);Acc:396814]	49	49	33	127	159	144	1.55327	2.18926	3.55722e-05
ENSSSCG00000015037	IL18	interleukin 18 [Source:NCBI gene (formerly Entrezgene);Acc:397057]	20	32	15	46	183	19	1.54401	1.25755	0.0178665
ENSSSCG00000015302	CFAP69	cilia and flagella associated protein 69 [Source:HGNC Symbol;Acc:HGNC:26107]	39	30	19	115	139	44	1.53145	1.62133	0.0013102
ENSSSCG00000020735	MAP3K15	mitogen-activated protein kinase kinase kinase 15 [Source:VGNC Symbol;Acc:VGNC:89984]	151	46	31	248	179	265	1.48042	2.92982	0.00640871
ENSSSCG00000006857	COL11A1	collagen type XI alpha 1 chain [Source:VGNC Symbol;Acc:VGNC:86862]	150	247	81	867	432	146	1.44067	3.93671	0.00602201
ENSSSCG00000016318	ASB18	ankyrin repeat and SOCS box containing 18 [Source:VGNC Symbol;Acc:VGNC:95922]	96	103	88	307	505	117	1.43348	3.21588	0.000412172
ENSSSCG00000032215	FOXD3	forkhead box D3 [Source:VGNC Symbol;Acc:VGNC:88201]	12	36	39	133	64	60	1.4327	1.52575	0.00913684
ENSSSCG00000012960	CST6	cystatin E/M [Source:VGNC Symbol;Acc:VGNC:87049]	59	113	32	181	333	126	1.42291	2.70943	0.00178851
ENSSSCG00000036201	NPR3	natriuretic peptide receptor 3 [Source:VGNC Symbol;Acc:VGNC:90858]	39	526	151	627	1580	143	1.41461	4.48237	0.0483167
ENSSSCG00000017416	DHX58	DExH-box helicase 58 [Source:VGNC Symbol;Acc:VGNC:87297]	48	59	36	69	256	124	1.40668	2.20636	0.00170158
ENSSSCG00000006810	KCNC4	potassium voltage-gated channel subfamily C member 4 [Source:VGNC Symbol;Acc:VGNC:89335]	253	370	798	1145	1983	1199	1.39598	5.48923	0.000153844
ENSSSCG00000010532	LOXL4	lysyl oxidase like 4 [Source:VGNC Symbol;Acc:VGNC:89783]	46	39	30	130	211	27	1.39443	1.90009	0.012312
ENSSSCG00000039874	CCL26	C-C motif chemokine ligand 26 [Source:VGNC Symbol;Acc:VGNC:86341]	32	24	24	23	103	110	1.38777	1.38582	0.0148931
ENSSSCG00000017569	CHAD	chondroadherin [Source:VGNC Symbol;Acc:VGNC:86621]	30	35	31	117	147	33	1.38602	1.63846	0.00497137
ENSSSCG00000004509	LIPG	lipase G, endothelial type [Source:VGNC Symbol;Acc:VGNC:89739]	51	48	12	115	162	59	1.37414	1.82679	0.00872319
ENSSSCG00000014796	nan	nan	96	79	261	401	722	233	1.37353	3.78323	0.00232817
ENSSSCG00000040673	TMEM140	transmembrane protein 140 [Source:VGNC Symbol;Acc:VGNC:94088]	519	235	359	709	1734	912	1.35406	5.11051	5.8984e-05
ENSSSCG00000009720	DDX60	DExD/H-box helicase 60 [Source:VGNC Symbol;Acc:VGNC:87234]	70	99	84	121	346	268	1.34638	2.97077	0.000676273
ENSSSCG00000029484	EMB	embigin [Source:VGNC Symbol;Acc:VGNC:87668]	85	24	17	114	90	144	1.34637	1.99442	0.0237927
ENSSSCG00000027628	IL6R	interleukin 6 receptor [Source:VGNC Symbol;Acc:VGNC:89112]	212	187	399	482	1544	454	1.34061	4.62201	0.000737727
ENSSSCG00000036538	nan	nan	20	31	47	70	76	123	1.33984	1.63132	0.00666481
ENSSSCG00000036246	GP91-PHOX	NADPH oxidase heavy chain subunit [Source:NCBI gene (formerly Entrezgene);Acc:397108]	63	109	77	55	669	93	1.33618	2.94356	0.0351455
ENSSSCG00000037762	TBX1	T-box transcription factor 1 [Source:VGNC Symbol;Acc:VGNC:93795]	50	28	38	96	213	48	1.33356	1.87457	0.00629212
ENSSSCG00000008647	CMPK2	cytidine/uridine monophosphate kinase 2 [Source:VGNC Symbol;Acc:VGNC:86801]	123	172	104	246	561	348	1.32901	3.60505	7.07956e-05
ENSSSCG00000032777	CXCL9	C-X-C motif chemokine ligand 9 [Source:VGNC Symbol;Acc:VGNC:87107]	41	44	33	52	277	45	1.32042	1.88519	0.0202818
ENSSSCG00000012077	MX1	MX dynamin like GTPase 1 [Source:VGNC Symbol;Acc:VGNC:98143]	229	373	169	274	1064	840	1.31043	4.53133	0.00157399
ENSSSCG00000001427	C4A	complement C4A (Rodgers blood group) [Source:NCBI gene (formerly Entrezgene);Acc:445467]	544	190	45	300	1348	662	1.30795	4.56239	0.0377944
ENSSSCG00000012853	IRF7	interferon regulatory factor 7 [Source:VGNC Symbol;Acc:VGNC:89210]	57	52	41	102	198	124	1.29423	2.19713	0.000499702
ENSSSCG00000035521	KLHL38	kelch like family member 38 [Source:VGNC Symbol;Acc:VGNC:89531]	1365	260	700	1900	2975	1716	1.28242	6.12731	0.00338251
ENSSSCG00000011195	GALNT15	polypeptide N-acetylgalactosaminyltransferase 15 [Source:VGNC Symbol;Acc:VGNC:88331]	186	36	353	181	1004	505	1.27771	4.12055	0.0400981
ENSSSCG00000030548	HERC5	HECT and RLD domain containing E3 ubiquitin protein ligase 5 [Source:VGNC Symbol;Acc:VGNC:88850]	61	104	51	101	279	215	1.27615	2.69041	0.00286567
ENSSSCG00000008737	C1QTNF7	C1q and TNF related 7 [Source:VGNC Symbol;Acc:VGNC:85986]	71	68	42	152	213	135	1.27542	2.44693	0.000442175
ENSSSCG00000029783	MKX	mohawk homeobox [Source:VGNC Symbol;Acc:VGNC:96020]	32	39	9	115	82	22	1.26238	1.29053	0.0471582
ENSSSCG00000032474	CXCL10	C-X-C motif chemokine ligand 10 [Source:VGNC Symbol;Acc:VGNC:87101]	48	43	50	37	320	71	1.25713	2.09456	0.0322521
ENSSSCG00000038602	SOGA3	nan	69	53	73	197	182	144	1.25587	2.54553	0.00052042
ENSSSCG00000029715	OLFM1	olfactomedin 1 [Source:VGNC Symbol;Acc:VGNC:91031]	93	97	218	510	343	236	1.25091	3.59607	0.00282174
ENSSSCG00000011358	TREX1	three prime repair exonuclease 1 [Source:VGNC Symbol;Acc:VGNC:94388]	24	26	26	63	116	36	1.24926	1.22186	0.00549722
ENSSSCG00000028911	COLQ	collagen like tail subunit of asymmetric acetylcholinesterase [Source:VGNC Symbol;Acc:VGNC:86884]	92	39	28	166	214	66	1.24849	2.25566	0.0146068
ENSSSCG00000010494	SORBS1	sorbin and SH3 domain containing 1 [Source:VGNC Symbol;Acc:VGNC:93337]	4467	2469	1708	5224	10178	7899	1.24164	7.9779	0.000315661
ENSSSCG00000043319	nan	nan	55	17	31	127	47	87	1.23572	1.63666	0.0307149
ENSSSCG00000032303	ENTPD2	ectonucleoside triphosphate diphosphohydrolase 2 [Source:VGNC Symbol;Acc:VGNC:87714]	46	53	25	143	172	30	1.23193	1.88454	0.0247362
ENSSSCG00000033613	FOXS1	forkhead box S1 [Source:VGNC Symbol;Acc:VGNC:96303]	145	164	137	225	569	406	1.22933	3.69869	0.00023636
ENSSSCG00000009881	OAS2	2'-5'-oligoadenylate synthetase 2 [Source:VGNC Symbol;Acc:VGNC:91007]	352	569	494	732	1847	1236	1.22879	5.35296	6.23409e-05
ENSSSCG00000036551	AGBL1	nan	146	38	18	153	286	122	1.22849	2.58391	0.0431922
ENSSSCG00000013901	IFI30	IFI30 lysosomal thiol reductase [Source:VGNC Symbol;Acc:VGNC:89031]	72	105	71	123	559	53	1.2081	2.8485	0.0361584
ENSSSCG00000012915	CLCF1	cardiotrophin like cytokine factor 1 [Source:VGNC Symbol;Acc:VGNC:86725]	19	15	34	45	102	40	1.20481	1.04714	0.0149036
ENSSSCG00000003620	TRIM62	tripartite motif containing 62 [Source:VGNC Symbol;Acc:VGNC:94423]	60	85	97	197	331	124	1.19377	2.80441	0.0014027
ENSSSCG00000034763	IRS2	insulin receptor substrate 2 [Source:VGNC Symbol;Acc:VGNC:89214]	459	372	424	767	1561	944	1.16992	5.14716	1.51676e-05
ENSSSCG00000025777	ESR1	estrogen receptor 1 [Source:VGNC Symbol;Acc:VGNC:103089]	58	46	70	123	198	128	1.16629	2.32365	0.00132807
ENSSSCG00000005762	KCNT1	potassium sodium-activated channel subfamily T member 1 [Source:VGNC Symbol;Acc:VGNC:89388]	29	91	57	116	293	71	1.1653	2.33358	0.0198539
ENSSSCG00000038255	ART1	ADP-ribosyltransferase 1 [Source:VGNC Symbol;Acc:VGNC:85551]	321	266	619	904	1691	627	1.16419	5.09229	0.000949169
ENSSSCG00000014900	RAB30	RAB30, member RAS onco family [Source:VGNC Symbol;Acc:VGNC:98254]	116	56	75	238	313	102	1.16354	2.82133	0.00598498
ENSSSCG00000033518	LLGL2	LLGL scribble cell polarity complex component 2 [Source:VGNC Symbol;Acc:VGNC:89747]	53	32	41	97	151	79	1.15988	1.86619	0.00304235
ENSSSCG00000000901	FGD6	FYVE, RhoGEF and PH domain containing 6 [Source:VGNC Symbol;Acc:VGNC:88099]	107	111	95	155	473	204	1.15885	3.1459	0.00176848
ENSSSCG00000002954	SPINT2	serine peptidase inhibitor, Kunitz type 2 [Source:VGNC Symbol;Acc:VGNC:98621]	26	30	17	48	116	32	1.1571	1.10265	0.0178734
ENSSSCG00000041499	nan	nan	175	38	54	210	193	252	1.15587	2.93027	0.0279569
ENSSSCG00000000997	PPP1R3G	protein phosphatase 1 regulatory subunit 3G [Source:VGNC Symbol;Acc:VGNC:91740]	138	82	22	180	188	220	1.14521	2.76928	0.0298686
ENSSSCG00000010055	GGT5	gamma-glutamyltransferase 5 [Source:VGNC Symbol;Acc:VGNC:88439]	41	17	35	48	94	90	1.13915	1.43223	0.0178545
ENSSSCG00000035667	KBTBD13	kelch repeat and BTB domain containing 13 [Source:VGNC Symbol;Acc:VGNC:89316]	77	59	63	271	173	55	1.13657	2.49136	0.0225175
ENSSSCG00000030165	MAFF	MAF bZIP transcription factor F [Source:VGNC Symbol;Acc:VGNC:89947]	101	91	189	165	494	318	1.13568	3.41896	0.00562775
ENSSSCG00000024973	GBP1	guanylate binding protein 1, interferon-inducible [Source:NCBI gene (formerly Entrezgene);Acc:100151938]	480	608	315	364	3098	493	1.13425	5.27343	0.0305076
ENSSSCG00000000712	ANO2	von Willebrand factor [Source:NCBI gene (formerly Entrezgene);Acc:399543]	2263	1724	1387	3920	5721	3778	1.12875	7.21172	1.6357e-05
ENSSSCG00000015175	VWA5A	von Willebrand factor A domain containing 5A [Source:VGNC Symbol;Acc:VGNC:94884]	100	46	31	115	283	73	1.12568	2.32358	0.0281196
ENSSSCG00000044793	nan	nan	21	27	22	54	30	77	1.1225	1.01165	0.0348423
ENSSSCG00000034802	RTP4	nan	34	60	44	103	166	79	1.12183	1.95706	0.00417579
ENSSSCG00000005944	NDRG1	N-myc downstream regulated 1 [Source:VGNC Symbol;Acc:VGNC:98825]	214	189	145	261	814	346	1.12	3.91986	0.00124967
ENSSSCG00000026155	FSCN2	fascin actin-bundling protein 2, retinal [Source:VGNC Symbol;Acc:VGNC:88249]	33	53	27	101	137	48	1.11947	1.6747	0.011686
ENSSSCG00000037559	ACOT11	acyl-CoA thioesterase 11 [Source:VGNC Symbol;Acc:VGNC:85016]	1073	474	88	1381	1835	877	1.11091	5.48714	0.0485483
ENSSSCG00000009322	SLC46A3	solute carrier family 46 member 3 [Source:VGNC Symbol;Acc:VGNC:93128]	128	151	108	248	393	302	1.10731	3.41047	0.000378842
ENSSSCG00000032452	WFS1	wolframin ER transmembrane glycoprotein [Source:VGNC Symbol;Acc:VGNC:94955]	850	467	826	1633	2324	1351	1.10015	5.87547	0.000139456
ENSSSCG00000005313	CCDC107	coiled-coil domain containing 107 [Source:VGNC Symbol;Acc:VGNC:86245]	137	193	188	408	487	354	1.09569	3.8209	0.000146665
ENSSSCG00000004347	FBXL4	F-box and leucine rich repeat protein 4 [Source:VGNC Symbol;Acc:VGNC:98007]	277	320	673	870	1528	770	1.09274	5.1154	0.00135023
ENSSSCG00000006290	SLC19A2	solute carrier family 19 member 2 [Source:VGNC Symbol;Acc:VGNC:92962]	154	212	94	227	628	292	1.08411	3.63665	0.00368766
ENSSSCG00000012050	RCAN1	regulator of calcineurin 1 [Source:VGNC Symbol;Acc:VGNC:92170]	2880	1801	1443	5495	7597	2253	1.08196	7.37014	0.00190921
ENSSSCG00000001063	MYLIP	myosin regulatory light chain interacting protein [Source:HGNC Symbol;Acc:HGNC:21155]	324	186	200	504	827	420	1.08177	4.27091	0.000410059
ENSSSCG00000036883	FABP3	fatty acid binding protein 3 [Source:NCBI gene (formerly Entrezgene);Acc:399532]	4754	1518	1933	7806	6826	4955	1.07995	7.79881	0.0050489
ENSSSCG00000035152	TEF	TEF transcription factor, PAR bZIP family member [Source:VGNC Symbol;Acc:VGNC:93864]	448	384	767	993	1227	1508	1.07994	5.43879	0.00122221
ENSSSCG00000013455	IZUMO4	IZUMO family member 4 [Source:VGNC Symbol;Acc:VGNC:89265]	41	41	29	99	106	62	1.07991	1.62833	0.00643784
ENSSSCG00000021562	PLXNA4	plexin A4 [Source:VGNC Symbol;Acc:VGNC:98204]	50	44	26	78	155	65	1.07787	1.73699	0.0109089
ENSSSCG00000034973	CXCL12	C-X-C motif chemokine ligand 12 [Source:VGNC Symbol;Acc:VGNC:87103]	3605	2251	1293	5616	10335	2295	1.07679	7.58806	0.00849111
ENSSSCG00000017255	ABCA5	ATP binding cassette subfamily A member 5 [Source:VGNC Symbol;Acc:VGNC:84949]	828	552	402	1423	1836	1051	1.07614	5.58626	0.000273621
ENSSSCG00000048933	nan	nan	26	17	63	63	109	84	1.07438	1.57406	0.0359954
ENSSSCG00000000774	USP18	ubiquitin specific peptidase 18 [Source:NCBI gene (formerly Entrezgene);Acc:396777]	148	169	113	214	496	327	1.06824	3.53431	0.00131399
ENSSSCG00000010452	IFIT1	interferon-induced protein with tetratricopeptide repeats 1 [Source:NCBI gene (formerly Entrezgene);Acc:100153038]	471	447	480	741	1510	1092	1.06302	5.22774	9.49401e-05
ENSSSCG00000000033	TSPO	translocator protein [Source:NCBI gene (formerly Entrezgene);Acc:396592]	99	79	46	111	389	80	1.06058	2.60689	0.0320995
ENSSSCG00000015774	TENM3	teneurin transmembrane protein 3 [Source:VGNC Symbol;Acc:VGNC:96233]	264	416	167	585	870	543	1.05405	4.48852	0.000952976
ENSSSCG00000005221	SPATA6L	spermatosis associated 6 like [Source:VGNC Symbol;Acc:VGNC:93388]	44	15	20	42	69	73	1.05252	1.14833	0.0421285
ENSSSCG00000005203	IL33	interleukin 33 [Source:VGNC Symbol;Acc:VGNC:89106]	195	132	66	218	483	251	1.05108	3.39839	0.00890634
ENSSSCG00000036933	NR1D1	nuclear receptor subfamily 1 group D member 1 [Source:VGNC Symbol;Acc:VGNC:90869]	199	64	382	524	766	291	1.04542	4.12222	0.0313907
ENSSSCG00000017886	C12H17orf100	F-box protein 39 [Source:VGNC Symbol;Acc:VGNC:88043]	160	195	148	265	458	435	1.04202	3.74141	0.0010579
ENSSSCG00000010791	FUOM	fucose mutarotase [Source:VGNC Symbol;Acc:VGNC:88265]	73	37	48	151	89	115	1.04057	2.10352	0.0198545
ENSSSCG00000015549	RNASEL	ribonuclease L [Source:VGNC Symbol;Acc:VGNC:92342]	31	20	22	31	73	66	1.03607	1.02579	0.0319664
ENSSSCG00000029886	LYVE1	lymphatic vessel endothelial hyaluronan receptor 1 [Source:VGNC Symbol;Acc:VGNC:89922]	217	167	165	228	959	217	1.03521	3.86928	0.0143131
ENSSSCG00000028814	SOD3	superoxide dismutase 3 [Source:VGNC Symbol;Acc:VGNC:93335]	57	70	36	45	258	101	1.03517	2.13583	0.0457071
ENSSSCG00000038888	C6H1orf122	chromosome 6 C1orf122 homolog [Source:VGNC Symbol;Acc:VGNC:86060]	118	77	47	254	190	114	1.03432	2.69767	0.0181654
ENSSSCG00000016322	ACKR3	atypical chemokine receptor 3 [Source:VGNC Symbol;Acc:VGNC:96017]	341	708	294	1183	1667	381	1.02773	5.13061	0.0116912
ENSSSCG00000016111	FZD7	frizzled class receptor 7 [Source:VGNC Symbol;Acc:VGNC:96310]	332	295	712	1269	1478	465	1.02691	5.14961	0.00932979
ENSSSCG00000006862	VCAM1	vascular cell adhesion molecule 1 [Source:VGNC Symbol;Acc:VGNC:94811]	377	347	439	685	1288	753	1.0164	4.93336	0.000141429
ENSSSCG00000011208	ZNF385D	zinc finger protein 385D [Source:VGNC Symbol;Acc:VGNC:95234]	608	383	183	900	1231	612	1.01523	4.94361	0.00561784
ENSSSCG00000035320	ASB14	ankyrin repeat and SOCS box containing 14 [Source:VGNC Symbol;Acc:VGNC:85562]	330	451	79	588	573	718	1.01437	4.4804	0.0280641
ENSSSCG00000012076	nan	nan	222	300	583	366	1282	934	1.01309	4.86028	0.0149411
ENSSSCG00000035297	ISG12(A)	putative ISG12(a) protein [Source:NCBI gene (formerly Entrezgene);Acc:100153902]	353	249	239	463	937	566	1.01287	4.46521	0.000545069
ENSSSCG00000007927	PPL	periplakin [Source:VGNC Symbol;Acc:VGNC:91702]	315	198	230	348	1167	327	1.01258	4.29001	0.00708071
ENSSSCG00000031738	COL24A1	nan	27	28	46	111	73	45	1.01185	1.45778	0.0329243
ENSSSCG00000034990	nan	nan	47	43	29	76	104	89	1.00743	1.67785	0.0103443
ENSSSCG00000015570	IVNS1ABP	influenza virus NS1A binding protein [Source:NCBI gene (formerly Entrezgene);Acc:100302027]	5569	3479	4643	8860	10586	11130	1.00693	8.48311	0.000368863
ENSSSCG00000036236	ELOVL6	ELOVL fatty acid elongase 6 [Source:VGNC Symbol;Acc:VGNC:87662]	457	460	131	206	222	159	-1.00086	3.76499	0.0152576
ENSSSCG00000018063	nan	nan	8979	5715	16307	3681	4105	8767	-1.00088	8.66301	0.0241293
ENSSSCG00000002383	FOS	Fos proto-onco, AP-1 transcription factor subunit [Source:NCBI gene (formerly Entrezgene);Acc:100144486]	751	3405	4553	929	1663	2139	-1.0112	6.81288	0.0418517
ENSSSCG00000010831	DUSP10	dual specificity phosphatase 10 [Source:VGNC Symbol;Acc:VGNC:96246]	696	826	1211	582	679	303	-1.01498	5.14839	0.000908774
ENSSSCG00000006172	PI15	peptidase inhibitor 15 [Source:VGNC Symbol;Acc:VGNC:98188]	1015	841	248	344	309	465	-1.01899	4.76265	0.0196135
ENSSSCG00000029558	EXTL1	exostosin like glycosyltransferase 1 [Source:VGNC Symbol;Acc:VGNC:87848]	465	828	986	468	458	333	-1.02296	4.87998	0.000958596
ENSSSCG00000026686	PDZD9	PDZ domain containing 9 [Source:VGNC Symbol;Acc:VGNC:91297]	238	566	411	227	169	246	-1.02444	3.96817	0.0058617
ENSSSCG00000022447	F3	coagulation factor III, tissue factor [Source:VGNC Symbol;Acc:VGNC:87864]	172	196	199	89	122	102	-1.02662	2.88595	0.00156467
ENSSSCG00000028905	TNIK	TRAF2 and NCK interacting kinase [Source:VGNC Symbol;Acc:VGNC:98381]	969	932	663	406	469	512	-1.02747	5.04771	0.000294152
ENSSSCG00000016513	KIAA1549	KIAA1549 [Source:VGNC Symbol;Acc:VGNC:99719]	73	127	113	57	73	44	-1.03173	2.03649	0.00673771
ENSSSCG00000009914	CABP1	nan	3499	6409	4249	2796	2768	2134	-1.03472	7.50028	0.000177517
ENSSSCG00000005287	PSAT1	phosphoserine aminotransferase 1 [Source:VGNC Symbol;Acc:VGNC:91893]	268	391	127	115	204	117	-1.04505	3.33433	0.00823471
ENSSSCG00000031380	MARCKSL1	MARCKS like 1 [Source:VGNC Symbol;Acc:VGNC:98498]	94	158	183	86	93	59	-1.04894	2.5002	0.00603877
ENSSSCG00000038281	MAP3K7CL	MAP3K7 C-terminal like [Source:VGNC Symbol;Acc:VGNC:89988]	282	384	274	148	206	157	-1.05131	3.59551	0.000427807
ENSSSCG00000038801	NPNT	nephronectin [Source:VGNC Symbol;Acc:VGNC:90855]	379	525	533	281	274	218	-1.05536	4.20642	0.00019794
ENSSSCG00000036480	CTNNA3	catenin alpha 3 [Source:VGNC Symbol;Acc:VGNC:87064]	164	209	112	82	103	77	-1.05668	2.64725	0.00321073
ENSSSCG00000026900	CDIN1	CDAN1 interacting nuclease 1 [Source:VGNC Symbol;Acc:VGNC:85960]	245	191	156	100	119	100	-1.05839	2.93853	0.00189305
ENSSSCG00000026457	GALNT17	polypeptide N-acetylgalactosaminyltransferase 17 [Source:HGNC Symbol;Acc:HGNC:16347]	182	343	386	144	219	135	-1.06473	3.54873	0.00187319
ENSSSCG00000036613	POLQ	DNA polymerase theta [Source:VGNC Symbol;Acc:VGNC:91641]	115	118	47	46	69	38	-1.06638	1.86674	0.0150061
ENSSSCG00000017927	BCL6B	BCL6B transcription repressor [Source:VGNC Symbol;Acc:VGNC:96566]	192	797	759	244	484	239	-1.07022	4.47612	0.011379
ENSSSCG00000041731	nan	nan	551	849	706	250	518	370	-1.07755	4.74529	0.000193038
ENSSSCG00000033000	TIMP4	TIMP metallopeptidase inhibitor 4 [Source:VGNC Symbol;Acc:VGNC:93997]	225	509	1447	388	305	431	-1.07994	4.8085	0.0342723
ENSSSCG00000028695	TMSB15A	nan	65	89	38	29	57	20	-1.0843	1.33014	0.0188043
ENSSSCG00000010639	HABP2	hyaluronan binding protein 2 [Source:NCBI gene (formerly Entrezgene);Acc:100157966]	57	64	196	60	62	46	-1.09498	2.04866	0.0332496
ENSSSCG00000014034	N4BP3	NEDD4 binding protein 3 [Source:VGNC Symbol;Acc:VGNC:90555]	160	342	354	184	166	101	-1.09609	3.44799	0.00357991
ENSSSCG00000017109	ADAMTS16	ADAM metallopeptidase with thrombospondin type 1 motif 16 [Source:VGNC Symbol;Acc:VGNC:85078]	60	92	47	43	48	16	-1.09721	1.3763	0.0184919
ENSSSCG00000049430	ARMC6	armadillo repeat containing 6 [Source:NCBI gene (formerly Entrezgene);Acc:100512037]	141	149	358	97	129	115	-1.09795	3.06208	0.00904794
ENSSSCG00000014113	HOMER1	homer scaffold protein 1 [Source:VGNC Symbol;Acc:VGNC:88928]	4646	3979	5091	2202	2426	2425	-1.11159	7.44255	1.94233e-05
ENSSSCG00000031518	STARD4	StAR related lipid transfer domain containing 4 [Source:VGNC Symbol;Acc:VGNC:93534]	53	115	65	24	70	32	-1.11183	1.58994	0.0153436
ENSSSCG00000033958	RYR3	ryanodine receptor 3 [Source:HGNC Symbol;Acc:HGNC:10485]	370	536	199	155	267	160	-1.11649	3.80015	0.00172418
ENSSSCG00000032996	nan	nan	150	282	275	119	161	92	-1.11849	3.16726	0.00139494
ENSSSCG00000014362	HBEGF	heparin binding EGF like growth factor [Source:VGNC Symbol;Acc:VGNC:88792]	346	732	983	256	646	233	-1.11902	4.7049	0.00327731
ENSSSCG00000006940	CCN1	cellular communication network factor 1 [Source:VGNC Symbol;Acc:VGNC:86344]	567	2949	2662	809	1244	1113	-1.12013	6.27593	0.0115036
ENSSSCG00000011454	SFMBT1	Scm like with four mbt domains 1 [Source:VGNC Symbol;Acc:VGNC:92773]	197	122	156	36	149	74	-1.12516	2.60796	0.0107582
ENSSSCG00000021397	PODXL2	podocalyxin like 2 [Source:VGNC Symbol;Acc:VGNC:91619]	49	87	101	49	40	32	-1.12522	1.61881	0.0107093
ENSSSCG00000031954	SLC39A10	solute carrier family 39 member 10 [Source:VGNC Symbol;Acc:VGNC:95952]	638	691	672	267	407	355	-1.12773	4.66043	2.45846e-05
ENSSSCG00000014011	RASGEF1C	RasGEF domain family member 1C [Source:VGNC Symbol;Acc:VGNC:92110]	36	58	66	20	44	21	-1.12957	1.06984	0.0122178
ENSSSCG00000033329	SLC47A1	solute carrier family 47 member 1 [Source:VGNC Symbol;Acc:VGNC:99043]	158	202	127	123	70	52	-1.13283	2.63025	0.00672794
ENSSSCG00000013049	RCOR2	REST corepressor 2 [Source:VGNC Symbol;Acc:VGNC:92184]	38	158	62	42	56	34	-1.13675	1.71736	0.0278779
ENSSSCG00000000795	ADAMTS20	ADAM metallopeptidase with thrombospondin type 1 motif 20 [Source:VGNC Symbol;Acc:VGNC:85082]	1151	1604	718	646	695	437	-1.13792	5.44121	0.000170581
ENSSSCG00000004399	SLC22A16	solute carrier family 22 member 16 [Source:VGNC Symbol;Acc:VGNC:92976]	269	278	390	148	134	181	-1.14393	3.57052	0.000985558
ENSSSCG00000020984	LXN	latexin [Source:VGNC Symbol;Acc:VGNC:89899]	107	306	372	158	163	83	-1.14685	3.30902	0.00884223
ENSSSCG00000029944	FASN	fatty acid synthase [Source:VGNC Symbol;Acc:VGNC:88016]	1429	1456	277	535	757	353	-1.14692	5.30307	0.0113581
ENSSSCG00000015589	VASH2	vasohibin 2 [Source:VGNC Symbol;Acc:VGNC:94802]	248	177	294	56	208	115	-1.16353	3.18828	0.00457524
ENSSSCG00000003928	PLK3	polo like kinase 3 [Source:VGNC Symbol;Acc:VGNC:91564]	27	103	144	29	62	47	-1.17498	1.80662	0.036495
ENSSSCG00000002535	HSP90AA1	heat shock protein 90 alpha family class A member 1 [Source:NCBI gene (formerly Entrezgene);Acc:397028]	24483	18065	55828	18759	16688	13407	-1.18021	10.2717	0.00175392
ENSSSCG00000038038	SBK1	SH3 domain binding kinase 1 [Source:VGNC Symbol;Acc:VGNC:92595]	368	616	436	311	217	165	-1.18119	4.14444	0.00031853
ENSSSCG00000010568	NPM3	nucleophosmin/nucleoplasmin 3 [Source:VGNC Symbol;Acc:VGNC:90854]	98	62	97	54	50	25	-1.18626	1.72149	0.00590805
ENSSSCG00000015363	AGR2	anterior gradient 2, protein disulphide isomerase family member [Source:VGNC Symbol;Acc:VGNC:85187]	34	44	85	28	32	21	-1.1919	1.08329	0.0132164
ENSSSCG00000004392	AMD1	adenosylmethionine decarboxylase 1 [Source:VGNC Symbol;Acc:VGNC:103024]	2897	3044	1193	966	1383	1144	-1.19401	6.46352	0.00025889
ENSSSCG00000040860	NMRK2	nicotinamide riboside kinase 2 [Source:VGNC Symbol;Acc:VGNC:90801]	2599	1575	782	705	1260	567	-1.19788	5.94559	0.0011634
ENSSSCG00000013375	MYOD1	myogenic differentiation 1 [Source:VGNC Symbol;Acc:VGNC:90537]	904	1121	619	363	503	422	-1.20007	5.03264	2.18681e-05
ENSSSCG00000026784	LMNB2	lamin B2 [Source:VGNC Symbol;Acc:VGNC:89761]	534	1179	483	383	443	253	-1.20079	4.75663	0.000368946
ENSSSCG00000047414	nan	nan	46	67	63	34	39	15	-1.20083	1.17922	0.00592869
ENSSSCG00000015140	HSPA8	heat shock protein family A (Hsp70) member 8 [Source:NCBI gene (formerly Entrezgene);Acc:100511890]	25511	32161	37014	15078	17620	13635	-1.20119	10.1977	1.94141e-06
ENSSSCG00000029598	FAM124A	family with sequence similarity 124 member A [Source:VGNC Symbol;Acc:VGNC:87898]	37	160	31	34	59	21	-1.20739	1.51755	0.0487151
ENSSSCG00000000138	PVALB	parvalbumin [Source:VGNC Symbol;Acc:VGNC:92007]	904	742	1312	862	295	237	-1.21653	5.20271	0.00649622
ENSSSCG00000021576	CD83	CD83 molecule [Source:VGNC Symbol;Acc:VGNC:86433]	119	208	310	116	160	45	-1.22766	2.99046	0.00584191
ENSSSCG00000043962	nan	nan	103	119	102	61	55	38	-1.23973	2.0239	0.000928601
ENSSSCG00000013784	DNAJB1	DnaJ heat shock protein family (Hsp40) member B1 [Source:VGNC Symbol;Acc:VGNC:96614]	425	953	962	385	461	273	-1.24938	4.84377	0.000104355
ENSSSCG00000037646	DNAJA4	DnaJ heat shock protein family (Hsp40) member A4 [Source:NCBI gene (formerly Entrezgene);Acc:397613]	4612	2333	2882	1732	2138	881	-1.27112	6.91687	7.59776e-05
ENSSSCG00000011622	KBTBD12	kelch repeat and BTB domain containing 12 [Source:VGNC Symbol;Acc:VGNC:89315]	509	378	684	273	215	230	-1.2736	4.2768	9.27326e-05
ENSSSCG00000017557	WFIKKN2	WAP, follistatin/kazal, immunoglobulin, kunitz and netrin domain containing 2 [Source:VGNC Symbol;Acc:VGNC:99105]	184	224	435	118	109	153	-1.27565	3.38179	0.00205245
ENSSSCG00000026110	SRPK2	SRSF protein kinase 2 [Source:VGNC Symbol;Acc:VGNC:93463]	846	401	713	301	404	222	-1.29008	4.59192	5.45525e-05
ENSSSCG00000009844	HSPB8	heat shock protein family B (small) member 8 [Source:VGNC Symbol;Acc:VGNC:96685]	16929	13270	23178	6826	10330	7630	-1.29614	9.34981	3.11345e-06
ENSSSCG00000008842	KIT	KIT proto-onco, receptor tyrosine kinase [Source:VGNC Symbol;Acc:VGNC:98060]	70	203	189	57	102	57	-1.2973	2.50454	0.0030481
ENSSSCG00000013753	nan	nan	105	735	381	124	279	162	-1.30696	3.87778	0.00926165
ENSSSCG00000029651	SLN	sarcolipin [Source:NCBI gene (formerly Entrezgene);Acc:733627]	40590	39301	79372	22960	17824	28311	-1.31721	10.9211	0.000247554
ENSSSCG00000002389	VASH1	vasohibin 1 [Source:VGNC Symbol;Acc:VGNC:94801]	128	607	642	208	301	123	-1.33899	4.05359	0.00429514
ENSSSCG00000007317	DLGAP4	DLG associated protein 4 [Source:VGNC Symbol;Acc:VGNC:96043]	1854	2476	2219	777	1460	762	-1.34223	6.3008	1.74922e-07
ENSSSCG00000007748	PSPH	phosphoserine phosphatase [Source:VGNC Symbol;Acc:VGNC:91931]	171	276	157	123	96	48	-1.34731	2.87027	0.000889618
ENSSSCG00000011076	OTUD1	OTU deubiquitinase 1 [Source:VGNC Symbol;Acc:VGNC:96156]	984	884	1853	534	450	602	-1.35881	5.49311	9.01592e-05
ENSSSCG00000035805	DLK1	delta like non-canonical Notch ligand 1 [Source:VGNC Symbol;Acc:VGNC:87333]	127	234	135	78	76	59	-1.37404	2.58171	0.000305165
ENSSSCG00000011000	DNAJA1	DnaJ heat shock protein family (Hsp40) member A1 [Source:NCBI gene (formerly Entrezgene);Acc:100512008]	1845	2283	1890	813	848	891	-1.37795	6.1691	1.36852e-07
ENSSSCG00000032170	DAPK3	death associated protein kinase 3 [Source:VGNC Symbol;Acc:VGNC:87158]	1276	829	1616	450	1054	248	-1.37971	5.48781	0.000233865
ENSSSCG00000028322	nan	nan	122	228	350	58	90	143	-1.38316	3.08097	0.00389387
ENSSSCG00000016131	ADAM23	ADAM metallopeptidase domain 23 [Source:VGNC Symbol;Acc:VGNC:95933]	109	84	230	47	58	72	-1.40309	2.36716	0.00322345
ENSSSCG00000004803	ACTC1	actin alpha cardiac muscle 1 [Source:VGNC Symbol;Acc:VGNC:85040]	8582	5034	2178	1181	4097	1781	-1.42077	7.5522	0.00114759
ENSSSCG00000039271	ST8SIA2	ST8 alpha-N-acetyl-neuraminide alpha-2,8-sialyltransferase 2 [Source:VGNC Symbol;Acc:VGNC:93517]	122	663	70	81	221	63	-1.47233	3.30891	0.0236006
ENSSSCG00000021696	NRSN1	neurensin 1 [Source:VGNC Symbol;Acc:VGNC:90902]	161	23	37	20	33	36	-1.47758	1.43636	0.0301898
ENSSSCG00000006141	CA3	carbonic anhydrase 3 [Source:VGNC Symbol;Acc:VGNC:86099]	76323	78366	43195	25693	40086	15869	-1.5031	11.1712	6.3918e-07
ENSSSCG00000006312	GPA33	glycoprotein A33 [Source:VGNC Symbol;Acc:VGNC:88568]	152	264	187	69	145	39	-1.50694	2.82553	0.000221293
ENSSSCG00000038646	ENAH	ENAH actin regulator [Source:HGNC Symbol;Acc:HGNC:18271]	2851	2410	3837	968	2313	616	-1.50778	6.73858	9.94706e-06
ENSSSCG00000007857	ACSM3	acyl-CoA synthetase medium chain family member 3 [Source:VGNC Symbol;Acc:VGNC:85035]	276	71	56	54	49	54	-1.50836	2.27063	0.0096178
ENSSSCG00000014076	FAM169A	family with sequence similarity 169 member A [Source:VGNC Symbol;Acc:VGNC:87927]	150	40	13	33	29	18	-1.52291	1.30038	0.0354796
ENSSSCG00000033606	LOC100155734	H2A clustered histone 6 [Source:HGNC Symbol;Acc:HGNC:4733]	279	311	607	159	115	175	-1.53162	3.81467	0.000121628
ENSSSCG00000013614	CNN1	calponin 1 [Source:VGNC Symbol;Acc:VGNC:86825]	1139	1707	996	376	656	468	-1.53819	5.47462	4.29699e-08
ENSSSCG00000011286	KLHL40	kelch like family member 40 [Source:VGNC Symbol;Acc:VGNC:89533]	4632	3324	17509	3667	4258	2164	-1.55189	8.22255	0.00151109
ENSSSCG00000034369	SPSB4	splA/ryanodine receptor domain and SOCS box containing 4 [Source:VGNC Symbol;Acc:VGNC:93433]	118	110	91	31	41	47	-1.56852	1.91492	9.53526e-05
ENSSSCG00000015052	USP28	ubiquitin specific peptidase 28 [Source:VGNC Symbol;Acc:VGNC:94756]	5237	4912	7840	1804	2828	2193	-1.58271	7.70199	1.24932e-08
ENSSSCG00000028464	TMEM170A	transmembrane protein 170A [Source:VGNC Symbol;Acc:VGNC:98659]	349	773	200	135	173	170	-1.60243	3.91397	0.000146697
ENSSSCG00000034993	NREP	neuronal regeneration related protein [Source:HGNC Symbol;Acc:HGNC:16834]	7782	20598	4328	4063	5080	2962	-1.60448	8.5305	0.000148357
ENSSSCG00000032193	NKAIN1	sodium/potassium transporting ATPase interacting 1 [Source:VGNC Symbol;Acc:VGNC:90754]	49	48	235	37	76	19	-1.6102	1.97511	0.0129325
ENSSSCG00000016652	LRRN3	leucine rich repeat neuronal 3 [Source:VGNC Symbol;Acc:VGNC:89862]	35	124	230	41	68	37	-1.62185	2.18376	0.00429754
ENSSSCG00000039962	HSPB1	heat shock protein family B (small) member 1 [Source:NCBI gene (formerly Entrezgene);Acc:493184]	3168	2017	4232	1226	1876	551	-1.62253	6.76326	4.98769e-06
ENSSSCG00000015796	PDLIM3	PDZ and LIM domain 3 [Source:VGNC Symbol;Acc:VGNC:95945]	16239	10345	32517	5086	9258	7255	-1.64786	9.40942	1.35516e-05
ENSSSCG00000010461	ANKRD1	ankyrin repeat domain 1 [Source:VGNC Symbol;Acc:VGNC:85321]	3796	1987	8314	985	4816	152	-1.65803	7.34246	0.023829
ENSSSCG00000016578	FLNC	filamin C [Source:VGNC Symbol;Acc:VGNC:88157]	61082	43495	119262	21321	35637	23334	-1.6866	11.3197	1.24456e-06
ENSSSCG00000006359	ADAMTS4	ADAM metallopeptidase with thrombospondin type 1 motif 4 [Source:VGNC Symbol;Acc:VGNC:85084]	61	185	159	20	85	40	-1.71998	2.20736	0.000926172
ENSSSCG00000015795	CCDC110	nan	603	320	1034	188	263	218	-1.73242	4.47859	7.21733e-06
ENSSSCG00000011453	ITIH4	inter-alpha-trypsin inhibitor heavy chain 4 [Source:NCBI gene (formerly Entrezgene);Acc:396799]	7114	1735	15561	3381	4111	1098	-1.7644	8.11471	0.00227491
ENSSSCG00000007530	PPP1R3D	protein phosphatase 1 regulatory subunit 3D [Source:VGNC Symbol;Acc:VGNC:96500]	310	568	202	75	183	98	-1.80948	3.57976	6.561e-06
ENSSSCG00000014843	CHRDL2	chordin like 2 [Source:VGNC Symbol;Acc:VGNC:86663]	95	96	4	19	13	26	-1.82648	1.15358	0.0279195
ENSSSCG00000027428	ENHO	energy homeostasis associated [Source:VGNC Symbol;Acc:VGNC:96058]	1767	2785	2021	609	660	733	-1.84851	6.17677	7.58242e-11
ENSSSCG00000010199	RET	ret proto-onco [Source:VGNC Symbol;Acc:VGNC:92220]	381	675	108	171	103	72	-1.8822	3.66733	0.00040475
ENSSSCG00000009334	HSPH1	heat shock protein family H (Hsp110) member 1 [Source:NCBI gene (formerly Entrezgene);Acc:100048931]	1320	1307	1502	358	560	349	-1.90277	5.50335	5.2081e-14
ENSSSCG00000029160	nan	nan	1983	2268	3232	525	1171	633	-1.90883	6.35998	1.02404e-10
ENSSSCG00000030681	MYBPH	myosin binding protein H [Source:VGNC Symbol;Acc:VGNC:98144]	16037	8443	68773	9904	9331	8457	-1.92296	10.0124	0.000605971
ENSSSCG00000032662	FGF6	fibroblast growth factor 6 [Source:VGNC Symbol;Acc:VGNC:88115]	98	267	92	35	45	48	-1.96576	2.31674	5.21612e-05
ENSSSCG00000043760	nan	nan	48	17	111	12	10	26	-1.96951	1.00815	0.00603845
ENSSSCG00000036060	RRAD	RRAD, Ras related glycolysis inhibitor and calcium channel regulator [Source:VGNC Symbol;Acc:VGNC:92454]	1345	1274	1536	307	738	206	-2.0079	5.49128	7.66995e-10
ENSSSCG00000003201	ATF5	activating transcription factor 5 [Source:VGNC Symbol;Acc:VGNC:85608]	368	350	595	115	137	114	-2.01445	3.83731	8.60038e-10
ENSSSCG00000033822	THRSP	thyroid hormone responsive [Source:NCBI gene (formerly Entrezgene);Acc:100512730]	291	308	10	66	33	55	-2.06704	2.70901	0.00956977
ENSSSCG00000041218	nan	nan	44	100	86	27	30	6	-2.08198	1.33714	0.000120495
ENSSSCG00000009630	EGR3	early growth response 3 [Source:VGNC Symbol;Acc:VGNC:87591]	2	112	96	23	27	5	-2.15151	1.19332	0.0200259
ENSSSCG00000038869	APLNR	apelin receptor [Source:VGNC Symbol;Acc:VGNC:85412]	169	1060	814	227	180	103	-2.16163	4.42506	2.14464e-05
ENSSSCG00000014336	EGR1	early growth response 1 [Source:VGNC Symbol;Acc:VGNC:87590]	600	3511	1935	381	460	584	-2.19644	5.97546	3.92205e-06
ENSSSCG00000013377	USH1C	USH1 protein network component harmonin [Source:VGNC Symbol;Acc:VGNC:94738]	58	48	176	27	24	18	-2.20354	1.61862	0.0001169
ENSSSCG00000010224	EGR2	early growth response 2 [Source:NCBI gene (formerly Entrezgene);Acc:100038004]	23	210	196	26	33	41	-2.2232	2.18553	0.000716206
ENSSSCG00000015595	ATF3	activating transcription factor 3 [Source:VGNC Symbol;Acc:VGNC:85606]	1884	1018	3061	409	510	493	-2.2458	5.97858	1.40337e-09
ENSSSCG00000039573	SLPI	secretory leukocyte peptidase inhibitor [Source:NCBI gene (formerly Entrezgene);Acc:396886]	180	600	762	141	155	75	-2.24935	4.01521	6.18805e-07
ENSSSCG00000002294	ARG2	arginase 2 [Source:VGNC Symbol;Acc:VGNC:85455]	155	289	121	28	52	49	-2.28351	2.56423	2.47865e-07
ENSSSCG00000015340	ASNS	asparagine synthetase (glutamine-hydrolyzing) [Source:NCBI gene (formerly Entrezgene);Acc:100312961]	1045	882	861	175	290	188	-2.29053	4.86431	2.33033e-17
ENSSSCG00000036224	nan	nan	153	153	819	89	89	80	-2.29425	3.57449	6.87093e-05
ENSSSCG00000015249	ADAMTS8	ADAM metallopeptidase with thrombospondin type 1 motif 8 [Source:VGNC Symbol;Acc:VGNC:85088]	67	259	56	40	26	17	-2.33148	1.98955	0.000157096
ENSSSCG00000021059	ADORA1	adenosine A1 receptor [Source:VGNC Symbol;Acc:VGNC:85147]	1046	720	3539	339	539	340	-2.33586	5.79781	1.04665e-06
ENSSSCG00000006717	PHGDH	phosphoglycerate dehydrogenase [Source:VGNC Symbol;Acc:VGNC:98184]	152	307	234	48	77	23	-2.45491	2.83132	6.1235e-09
ENSSSCG00000010554	SCD	stearoyl-CoA desaturase [Source:NCBI gene (formerly Entrezgene);Acc:396670]	768	1316	24	99	282	67	-2.50502	4.40421	0.00225806
ENSSSCG00000005385	NR4A3	nuclear receptor subfamily 4 group A member 3 [Source:VGNC Symbol;Acc:VGNC:90885]	753	360	126	59	84	88	-2.5765	3.65599	9.48565e-07
ENSSSCG00000040849	nan	nan	262	560	3024	169	497	95	-2.66215	5.28504	0.000161128
ENSSSCG00000031616	FOSB	FosB proto-onco, AP-1 transcription factor subunit [Source:VGNC Symbol;Acc:VGNC:88190]	82	1321	677	60	188	120	-2.69123	4.35865	4.80827e-05
ENSSSCG00000045624	nan	nan	232	464	743	72	119	32	-2.939	3.82212	1.54103e-10
ENSSSCG00000036049	PEG10	paternally expressed 10 [Source:NCBI gene (formerly Entrezgene);Acc:654416]	2146	1060	8252	360	607	248	-3.4888	6.77354	2.83781e-09

## Sheet: TP and BP consistently DEGs
Supplementary Table 2-3: TP and BP consistently DEGs
Ensembl ID	Gene name
ENSSSCG00000004573	LOC100152206
ENSSSCG00000050502	nan
ENSSSCG00000004509	LIPG
ENSSSCG00000014900	RAB30
ENSSSCG00000040638	DIO2
ENSSSCG00000031738	COL24A1
ENSSSCG00000038521	CHAC1
ENSSSCG00000014799	nan
ENSSSCG00000005981	FBXO32
ENSSSCG00000011133	PFKFB3
ENSSSCG00000007760	PRSS36
ENSSSCG00000022256	DEPP1
ENSSSCG00000000901	FGD6
ENSSSCG00000035521	KLHL38
ENSSSCG00000011208	ZNF385D
ENSSSCG00000040673	TMEM140
ENSSSCG00000011195	GALNT15
ENSSSCG00000022945	UCHL1
ENSSSCG00000001849	ANPEP
ENSSSCG00000036883	FABP3
ENSSSCG00000007043	GPCPD1
ENSSSCG00000012076	nan
ENSSSCG00000041499	nan
ENSSSCG00000038602	SOGA3
ENSSSCG00000030165	MAFF
ENSSSCG00000039651	SLC2A5
ENSSSCG00000037527	CPLX1
ENSSSCG00000036551	AGBL1
ENSSSCG00000017927	BCL6B
ENSSSCG00000038038	SBK1
ENSSSCG00000013614	CNN1
ENSSSCG00000013784	DNAJB1
ENSSSCG00000016131	ADAM23
ENSSSCG00000026900	CDIN1
ENSSSCG00000014336	EGR1
ENSSSCG00000002383	FOS
ENSSSCG00000013753	nan
ENSSSCG00000036060	RRAD
ENSSSCG00000038869	APLNR
ENSSSCG00000010199	RET
ENSSSCG00000036224	nan
ENSSSCG00000004399	SLC22A16
ENSSSCG00000014362	HBEGF
ENSSSCG00000028905	TNIK
ENSSSCG00000021576	CD83
ENSSSCG00000004803	ACTC1
ENSSSCG00000008842	KIT
ENSSSCG00000005385	NR4A3
ENSSSCG00000013375	MYOD1
ENSSSCG00000006141	CA3
ENSSSCG00000015595	ATF3
ENSSSCG00000033958	RYR3
ENSSSCG00000031616	FOSB
ENSSSCG00000039271	ST8SIA2
ENSSSCG00000010639	HABP2
ENSSSCG00000040860	NMRK2
ENSSSCG00000034993	NREP
ENSSSCG00000010554	SCD
ENSSSCG00000036613	POLQ
ENSSSCG00000010461	ANKRD1
ENSSSCG00000032170	DAPK3
ENSSSCG00000032996	nan
ENSSSCG00000010568	NPM3
ENSSSCG00000009844	HSPB8
ENSSSCG00000007927	PPL
ENSSSCG00000005055	LGALS3
ENSSSCG00000013901	IFI30
ENSSSCG00000016318	ASB18
ENSSSCG00000020735	MAP3K15
ENSSSCG00000006857	COL11A1
ENSSSCG00000025777	ESR1
ENSSSCG00000003414	ANGPTL7
ENSSSCG00000021084	S100A6
ENSSSCG00000035667	KBTBD13

## Sheet: TP uniquely up-regulated DEGs
Supplementary Table 2-4: TP uniquely up-regulated DEGs
Ensembl ID	Gene name
ENSSSCG00000041810	nan
ENSSSCG00000015334	PDK4
ENSSSCG00000008809	GABRG1
ENSSSCG00000001550	ARMC12
ENSSSCG00000002831	IRX3
ENSSSCG00000031556	nan
ENSSSCG00000021036	RAB3B
ENSSSCG00000002032	SLC7A8
ENSSSCG00000003377	ACOT7
ENSSSCG00000004694	FRMD5
ENSSSCG00000038006	SLC25A33
ENSSSCG00000014834	UCP3
ENSSSCG00000042665	LOC110256489
ENSSSCG00000031450	MLYCD
ENSSSCG00000025901	LCLAT1
ENSSSCG00000048448	nan
ENSSSCG00000034358	KCNJ16
ENSSSCG00000044931	nan
ENSSSCG00000004511	MYO5B
ENSSSCG00000030278	MLLT11
ENSSSCG00000038600	PRSS8
ENSSSCG00000010853	EPHX1
ENSSSCG00000012182	PCYT1B
ENSSSCG00000038643	KLF11
ENSSSCG00000004233	SMPDL3A
ENSSSCG00000035863	PLIN2
ENSSSCG00000051428	nan
ENSSSCG00000040779	CBS
ENSSSCG00000026597	SLC38A4
ENSSSCG00000045652	nan
ENSSSCG00000012653	ZDHHC9
ENSSSCG00000003368	RNF207
ENSSSCG00000037355	RNF115
ENSSSCG00000050765	nan
ENSSSCG00000003018	LIPE
ENSSSCG00000035887	C4H8orf34
ENSSSCG00000001835	ABHD2
ENSSSCG00000009182	ADH1C
ENSSSCG00000002279	GPX2
ENSSSCG00000016448	KCNH2
ENSSSCG00000000975	PANX2
ENSSSCG00000022492	AMPD3
ENSSSCG00000016792	RETREG1
ENSSSCG00000002280	RAB15
ENSSSCG00000008368	UGP2
ENSSSCG00000009357	SMAD9
ENSSSCG00000040746	LRP2
ENSSSCG00000023160	LOC100156657
ENSSSCG00000041954	LOC100627067
ENSSSCG00000028492	C8H4orf46
ENSSSCG00000035537	RUNX1
ENSSSCG00000022726	RHOD
ENSSSCG00000016859	C7
ENSSSCG00000002281	FNTB
ENSSSCG00000035582	GIPC2
ENSSSCG00000015893	SLC4A10
ENSSSCG00000006932	CLCA4
ENSSSCG00000006866	DBT
ENSSSCG00000050440	LOC110257307
ENSSSCG00000010456	PANK1
ENSSSCG00000051574	nan
ENSSSCG00000021067	BLVRB
ENSSSCG00000012880	CPT1A
ENSSSCG00000037912	FITM2
ENSSSCG00000010580	NFKB2
ENSSSCG00000010992	AQP7
ENSSSCG00000017213	JPT1
ENSSSCG00000036724	CRYAB
ENSSSCG00000010211	CCDC6
ENSSSCG00000005047	CDKN3
ENSSSCG00000033112	TSPYL5
ENSSSCG00000035249	GADD45G
ENSSSCG00000047299	nan
ENSSSCG00000029507	RASGEF1B
ENSSSCG00000016018	FRZB
ENSSSCG00000004332	BACH2
ENSSSCG00000002051	ABHD4
ENSSSCG00000023298	SRXN1
ENSSSCG00000044399	nan
ENSSSCG00000000645	GABARAPL1
ENSSSCG00000014259	ADAMTS19
ENSSSCG00000045512	ECE2
ENSSSCG00000012525	BEX1
ENSSSCG00000012546	NRK
ENSSSCG00000001549	FKBP5
ENSSSCG00000001836	RLBP1
ENSSSCG00000013893	ARRDC2
ENSSSCG00000015545	GLUL
ENSSSCG00000038320	POR
ENSSSCG00000004454	ME1
ENSSSCG00000031262	TXNIP
ENSSSCG00000032605	LOC100738403
ENSSSCG00000016826	RAD1
ENSSSCG00000001565	CDKN1A
ENSSSCG00000008169	TBC1D8
ENSSSCG00000014049	UNC5A
ENSSSCG00000030415	DPP3
ENSSSCG00000006935	CLCA2
ENSSSCG00000027013	LOC110255237
ENSSSCG00000000856	PAH
ENSSSCG00000004576	RORA
ENSSSCG00000016620	TSPAN12
ENSSSCG00000007336	NNAT
ENSSSCG00000006095	CCNE2
ENSSSCG00000040056	NUDT4
ENSSSCG00000039049	MAP7
ENSSSCG00000032950	SLC25A34
ENSSSCG00000009370	FOXO1
ENSSSCG00000007942	HMOX2
ENSSSCG00000002142	TEP1
ENSSSCG00000039258	C5H12orf66
ENSSSCG00000003582	SMPDL3B
ENSSSCG00000005456	MUSK
ENSSSCG00000011727	PTX3
ENSSSCG00000035908	HMGB3
ENSSSCG00000008624	LPIN1
ENSSSCG00000025534	CSE1L
ENSSSCG00000015945	METTL8
ENSSSCG00000010816	TGFB2
ENSSSCG00000013637	QTRT1
ENSSSCG00000029515	PON3
ENSSSCG00000026533	MYF6
ENSSSCG00000038663	nan
ENSSSCG00000015405	CD36
ENSSSCG00000013599	ANGPTL4
ENSSSCG00000022839	IFFO2
ENSSSCG00000008412	PSME4
ENSSSCG00000038144	MYH10
ENSSSCG00000012844	SLC25A22
ENSSSCG00000042170	nan
ENSSSCG00000022364	CPT1B
ENSSSCG00000027121	ODC1
ENSSSCG00000014112	JMY
ENSSSCG00000002642	CDH15
ENSSSCG00000038348	NME1
ENSSSCG00000010948	CTSL
ENSSSCG00000033860	ZMAT3
ENSSSCG00000034738	TRMT61A
ENSSSCG00000011518	SHQ1
ENSSSCG00000009642	STC1
ENSSSCG00000029805	RHOBTB3
ENSSSCG00000030378	LIMK1
ENSSSCG00000008282	WDR54
ENSSSCG00000004390	SESN1
ENSSSCG00000003393	TMEM201
ENSSSCG00000035136	SDCCAG8
ENSSSCG00000014060	KIAA1191
ENSSSCG00000015784	ACSL1
ENSSSCG00000012136	PIR
ENSSSCG00000033655	LOC100624785
ENSSSCG00000023078	WDR4
ENSSSCG00000015844	GSR
ENSSSCG00000029837	VWA8
ENSSSCG00000003645	UTP11
ENSSSCG00000035037	SIK1
ENSSSCG00000039953	PNRC1
ENSSSCG00000013349	HTATIP2
ENSSSCG00000004607	PYGO1
ENSSSCG00000001701	HSP90AB1
ENSSSCG00000014933	NAALAD2
ENSSSCG00000008835	RASL11B
ENSSSCG00000013896	MPV17L2
ENSSSCG00000008965	BTC
ENSSSCG00000005467	HSDL2
ENSSSCG00000013643	CDKN2D
ENSSSCG00000016511	TTC26
ENSSSCG00000004725	ZNF106
ENSSSCG00000021200	HDAC8
ENSSSCG00000014123	FAM151B
ENSSSCG00000033025	C13H21orf91
ENSSSCG00000003875	TTC39A
ENSSSCG00000038879	RELB
ENSSSCG00000012163	RPS6KA3
ENSSSCG00000000807	SLC38A1
ENSSSCG00000012000	GBE1
ENSSSCG00000015071	SIK3
ENSSSCG00000016210	ABCB6
ENSSSCG00000017617	SCPEP1
ENSSSCG00000027189	PPP1R12C
ENSSSCG00000015794	C15H4orf47
ENSSSCG00000012654	UTP14A
ENSSSCG00000014156	ARRDC3
ENSSSCG00000051532	nan
ENSSSCG00000028197	PFKL
ENSSSCG00000035619	TMEM135
ENSSSCG00000013400	nan
ENSSSCG00000008761	TBC1D19
ENSSSCG00000040793	CTSD
ENSSSCG00000025027	METTL1
ENSSSCG00000027903	LOC102167481
ENSSSCG00000015267	FMO2
ENSSSCG00000003914	PRDX1
ENSSSCG00000016929	PDE4D
ENSSSCG00000037499	NEDD4
ENSSSCG00000006865	RTCA
ENSSSCG00000013336	CCDC34
ENSSSCG00000012639	THOC2
ENSSSCG00000006277	SPIDR
ENSSSCG00000038950	VARS1
ENSSSCG00000014016	SQSTM1
ENSSSCG00000046669	nan
ENSSSCG00000023630	CPM
ENSSSCG00000020808	CCT6A
ENSSSCG00000039867	UCK2
ENSSSCG00000036742	KLF15
ENSSSCG00000004314	PM20D2
ENSSSCG00000007554	ZFAND2A
ENSSSCG00000010530	CRTAC1
ENSSSCG00000005941	KHDRBS3
ENSSSCG00000010814	ESRRG
ENSSSCG00000004601	MNS1
ENSSSCG00000022635	BEX4
ENSSSCG00000037413	KBTBD7
ENSSSCG00000022404	SLC3A2
ENSSSCG00000003973	CTPS1
ENSSSCG00000006214	RRS1
ENSSSCG00000040918	LTV1
ENSSSCG00000010564	POLL
ENSSSCG00000041409	MFSD4B
ENSSSCG00000011913	CCDC191
ENSSSCG00000022099	TP53INP2
ENSSSCG00000005004	LRR1
ENSSSCG00000023391	LONP2
ENSSSCG00000012843	PIDD1
ENSSSCG00000005453	TXN
ENSSSCG00000016518	TRIM24
ENSSSCG00000011366	SLC25A20
ENSSSCG00000008121	GPAT2
ENSSSCG00000012007	HSPA13
ENSSSCG00000037267	MAX
ENSSSCG00000009084	SPATA5
ENSSSCG00000000559	RASSF8
ENSSSCG00000046387	ECE2
ENSSSCG00000030095	ZBTB16
ENSSSCG00000000743	FKBP4
ENSSSCG00000009814	ANAPC5
ENSSSCG00000031736	MGST2
ENSSSCG00000015840	WRN
ENSSSCG00000024108	SLC43A2
ENSSSCG00000000843	TXNRD1
ENSSSCG00000008877	ETFDH
ENSSSCG00000026395	TARS2
ENSSSCG00000010219	ARID5B
ENSSSCG00000045048	nan
ENSSSCG00000027472	GCA
ENSSSCG00000040439	TMED5
ENSSSCG00000031869	VPS72
ENSSSCG00000010198	BMS1
ENSSSCG00000013105	CCDC86
ENSSSCG00000012825	IKBKG
ENSSSCG00000040621	ARHGEF33
ENSSSCG00000013397	ARNTL
ENSSSCG00000050590	nan
ENSSSCG00000004101	LRP11
ENSSSCG00000008448	PREPL
ENSSSCG00000039745	HMOX1
ENSSSCG00000016062	NABP1
ENSSSCG00000017947	ACADVL
ENSSSCG00000031888	DDIT4
ENSSSCG00000035730	ZDHHC21
ENSSSCG00000015056	REXO2
ENSSSCG00000013391	PSMA1
ENSSSCG00000036239	GJA8
ENSSSCG00000011563	FANCD2
ENSSSCG00000027689	SRM
ENSSSCG00000010734	OAT
ENSSSCG00000036059	HSPB3
ENSSSCG00000015892	PSMD14
ENSSSCG00000008503	FEZ2
ENSSSCG00000009766	ATP6V0A2
ENSSSCG00000004387	FOXO3
ENSSSCG00000033278	ATP6V1D
ENSSSCG00000021977	GPD1L
ENSSSCG00000016577	ATP6V1F
ENSSSCG00000001411	APOM
ENSSSCG00000033791	IMPA1
ENSSSCG00000051257	nan
ENSSSCG00000029005	KPNA2
ENSSSCG00000014830	COA4
ENSSSCG00000011873	HSPBAP1
ENSSSCG00000027407	MYH14
ENSSSCG00000010990	NOL6
ENSSSCG00000048711	nan
ENSSSCG00000009239	LOC100524999
ENSSSCG00000015592	TATDN3
ENSSSCG00000006184	TERF1
ENSSSCG00000034756	PLB1
ENSSSCG00000036431	VPS13C
ENSSSCG00000001493	PRIM2

## Sheet: TP uniquely down-regulated DEGs
Supplementary Table 2-5: TP uniquely down-regulated DEGs
Ensembl ID	Gene name
ENSSSCG00000013433	ADAMTSL5
ENSSSCG00000021361	ZNF710
ENSSSCG00000010529	SFRP5
ENSSSCG00000031125	AMPD2
ENSSSCG00000007369	JPH2
ENSSSCG00000020963	EPDR1
ENSSSCG00000037958	TOB2
ENSSSCG00000025729	IRS1
ENSSSCG00000005997	COL14A1
ENSSSCG00000027922	UNC5CL
ENSSSCG00000014406	PRELID2
ENSSSCG00000004138	HIVEP2
ENSSSCG00000049125	nan
ENSSSCG00000012492	DRP2
ENSSSCG00000021359	CDC42EP3
ENSSSCG00000008440	PIGF
ENSSSCG00000017565	SPATA20
ENSSSCG00000039315	SOX10
ENSSSCG00000037766	NR3C2
ENSSSCG00000009037	ZNF827
ENSSSCG00000000443	GLI1
ENSSSCG00000023181	ZNF385B
ENSSSCG00000004961	ITGA11
ENSSSCG00000050245	CCDC13
ENSSSCG00000018046	LOC102157639
ENSSSCG00000026724	GUCY2C
ENSSSCG00000024917	nan
ENSSSCG00000037832	PMP22
ENSSSCG00000003547	NCMAP
ENSSSCG00000008738	CC2D2A
ENSSSCG00000001914	LOXL1
ENSSSCG00000004921	ATP8B1
ENSSSCG00000024219	TIGAR
ENSSSCG00000029227	LDB2
ENSSSCG00000013401	DKK3
ENSSSCG00000032157	GVQW3
ENSSSCG00000048318	STAC
ENSSSCG00000027124	nan
ENSSSCG00000009166	MANBA
ENSSSCG00000027667	EML1
ENSSSCG00000005086	SIX6
ENSSSCG00000033074	ZCCHC24
ENSSSCG00000005480	RGS3
ENSSSCG00000031489	DUSP22
ENSSSCG00000012408	NHSL2
ENSSSCG00000005641	DNM1
ENSSSCG00000034441	MRGPRF
ENSSSCG00000005457	LPAR1
ENSSSCG00000044553	DDIT3
ENSSSCG00000029945	GCAT
ENSSSCG00000027426	BCL3
ENSSSCG00000008168	RNF149
ENSSSCG00000040904	CLDN1
ENSSSCG00000037852	nan
ENSSSCG00000035419	RARRES2
ENSSSCG00000006829	SYPL2
ENSSSCG00000025652	CDH1
ENSSSCG00000034297	HES2
ENSSSCG00000005975	MTSS1
ENSSSCG00000026427	RORC
ENSSSCG00000029949	CD248
ENSSSCG00000002315	SLC8A3
ENSSSCG00000038260	nan
ENSSSCG00000011959	ABI3BP
ENSSSCG00000004632	GLDN
ENSSSCG00000015281	PLEKHA6
ENSSSCG00000010322	ZNF503
ENSSSCG00000011400	SEMA3B
ENSSSCG00000034491	PRICKLE1
ENSSSCG00000040728	EYA1
ENSSSCG00000002712	LDHD
ENSSSCG00000034378	IFNGR2
ENSSSCG00000032330	THY1
ENSSSCG00000008874	TMEM144
ENSSSCG00000017376	MEOX1
ENSSSCG00000005449	PTPN3
ENSSSCG00000013073	FADS3
ENSSSCG00000009526	ITGBL1
ENSSSCG00000033830	CCDC8
ENSSSCG00000017923	ALOX12
ENSSSCG00000038071	RASL12
ENSSSCG00000004049	ACAT2
ENSSSCG00000010071	MMP11
ENSSSCG00000017131	FN3K
ENSSSCG00000005994	SNTB1
ENSSSCG00000009007	TMEM131L
ENSSSCG00000031692	nan
ENSSSCG00000003351	MMP23
ENSSSCG00000002001	REC8
ENSSSCG00000008115	LOC100738720
ENSSSCG00000004484	COL12A1
ENSSSCG00000004755	DLL4
ENSSSCG00000013237	SPI1
ENSSSCG00000000456	SLC16A7
ENSSSCG00000035355	F2R
ENSSSCG00000007350	PPP1R16B
ENSSSCG00000016925	PLK2
ENSSSCG00000042332	nan
ENSSSCG00000003569	SLC9A1
ENSSSCG00000040337	AK4
ENSSSCG00000047367	nan
ENSSSCG00000037918	ADIRF
ENSSSCG00000016810	PDZD2
ENSSSCG00000029838	nan
ENSSSCG00000013145	DTX4
ENSSSCG00000014310	CXCL14
ENSSSCG00000001695	VEGFA
ENSSSCG00000014827	PLEKHB1
ENSSSCG00000009842	CCDC60
ENSSSCG00000013072	FADS2
ENSSSCG00000003821	KANK4
ENSSSCG00000002385	TGFB3
ENSSSCG00000038911	KLF2
ENSSSCG00000023975	CCDC9B
ENSSSCG00000035074	FOXO6
ENSSSCG00000016464	CASP2
ENSSSCG00000000411	NAB2
ENSSSCG00000045673	RTP3
ENSSSCG00000005249	FAM189A2
ENSSSCG00000036078	KCNJ3
ENSSSCG00000037970	SOX8
ENSSSCG00000037142	LOC110258364
ENSSSCG00000011521	PDZRN3
ENSSSCG00000046645	nan
ENSSSCG00000036135	COL1A1
ENSSSCG00000047186	nan
ENSSSCG00000015753	ANGPT2
ENSSSCG00000001076	RNF144B
ENSSSCG00000002806	MMP15
ENSSSCG00000038829	LOC100621428
ENSSSCG00000033001	FZD8
ENSSSCG00000009203	SNCA
ENSSSCG00000040445	RND3
ENSSSCG00000015664	CD55
ENSSSCG00000012234	SRPX
ENSSSCG00000041032	LOC106509609
ENSSSCG00000004192	CCN2
ENSSSCG00000037260	COL20A1
ENSSSCG00000002333	DPF3
ENSSSCG00000030655	nan
ENSSSCG00000039161	MEIS1
ENSSSCG00000032601	RASSF2
ENSSSCG00000015474	PPFIA4
ENSSSCG00000032053	ST8SIA5
ENSSSCG00000044913	nan
ENSSSCG00000023001	CCDC149
ENSSSCG00000022925	SLC2A3
ENSSSCG00000016260	SLC16A14
ENSSSCG00000040207	P2RY2
ENSSSCG00000017734	RHBDL3
ENSSSCG00000030565	GRIA4
ENSSSCG00000015522	ANGPTL1
ENSSSCG00000030005	LGALSL
ENSSSCG00000025924	IGFBP5
ENSSSCG00000007231	MYLK2
ENSSSCG00000022446	SEL1L3
ENSSSCG00000016983	STC2
ENSSSCG00000023806	LRRN1
ENSSSCG00000005943	ST3GAL1
ENSSSCG00000016887	ITGA2
ENSSSCG00000038767	MBP
ENSSSCG00000021591	RBM3
ENSSSCG00000000111	BAIAP2L2
ENSSSCG00000028512	LDLR
ENSSSCG00000041717	nan
ENSSSCG00000015368	HDAC9
ENSSSCG00000000261	IGFBP6
ENSSSCG00000014219	CDO1
ENSSSCG00000006737	IGSF3
ENSSSCG00000039056	GAS7
ENSSSCG00000041180	nan
ENSSSCG00000039873	DCXR
ENSSSCG00000006243	PENK
ENSSSCG00000039921	LOC100153854
ENSSSCG00000048443	APLN
ENSSSCG00000047250	nan
ENSSSCG00000022797	PPP1R3B
ENSSSCG00000000838	SLC41A2
ENSSSCG00000008991	FRAS1
ENSSSCG00000004811	PGPEP1L
ENSSSCG00000017909	nan
ENSSSCG00000001434	EGFL8
ENSSSCG00000014047	FGFR4
ENSSSCG00000005085	C1H14orf39
ENSSSCG00000013273	CHST1
ENSSSCG00000013737	RNASEH2A
ENSSSCG00000026701	PHOSPHO1
ENSSSCG00000028282	SLC1A4
ENSSSCG00000015270	FMOD
ENSSSCG00000034765	PIEZO2
ENSSSCG00000013327	MPPED2
ENSSSCG00000011973	COL8A1
ENSSSCG00000005627	AK1
ENSSSCG00000049640	nan
ENSSSCG00000012941	SLC29A2
ENSSSCG00000049456	nan
ENSSSCG00000004250	SLC35F1
ENSSSCG00000031261	RHOQ
ENSSSCG00000015326	COL1A2
ENSSSCG00000006183	SBSPON
ENSSSCG00000006415	CADM3
ENSSSCG00000036428	nan
ENSSSCG00000006107	PDP1
ENSSSCG00000037430	COL6A6
ENSSSCG00000013374	KCNC1
ENSSSCG00000012508	LOC100520992
ENSSSCG00000022209	ITGB1BP2
ENSSSCG00000007488	DOK5
ENSSSCG00000012018	CHODL
ENSSSCG00000002140	KLHL33
ENSSSCG00000051491	nan
ENSSSCG00000033214	GNMT
ENSSSCG00000006774	PPM1J
ENSSSCG00000038439	PRX
ENSSSCG00000044764	nan
ENSSSCG00000011806	MASP1
ENSSSCG00000013243	DDB2
ENSSSCG00000026516	EPHB3
ENSSSCG00000026232	FAM184B
ENSSSCG00000008294	ACTG2
ENSSSCG00000000419	LOC100512656
ENSSSCG00000012375	DLG3
ENSSSCG00000022504	CDON
ENSSSCG00000037140	nan
ENSSSCG00000010241	TET1
ENSSSCG00000031904	UGT8
ENSSSCG00000035983	TPPP3
ENSSSCG00000030026	SORCS1
ENSSSCG00000027607	IER3
ENSSSCG00000013263	CREB3L1
ENSSSCG00000011894	POPDC2
ENSSSCG00000031311	LOC110258046
ENSSSCG00000027790	LOC100514323
ENSSSCG00000006982	ZDHHC2
ENSSSCG00000042575	nan
ENSSSCG00000028552	BHLHE41
ENSSSCG00000047225	nan
ENSSSCG00000009489	GPC6
ENSSSCG00000006082	MATN2
ENSSSCG00000009751	FZD10
ENSSSCG00000027525	DHCR24
ENSSSCG00000021811	GDPD3
ENSSSCG00000009134	EGF
ENSSSCG00000007477	NFATC2
ENSSSCG00000000759	WNT5B
ENSSSCG00000006352	MPZ
ENSSSCG00000036446	PALD1
ENSSSCG00000025822	SFRP1
ENSSSCG00000011599	GRIP2
ENSSSCG00000039704	nan
ENSSSCG00000046877	nan
ENSSSCG00000036062	RNF122
ENSSSCG00000040205	TLCD2
ENSSSCG00000034821	ARMCX4
ENSSSCG00000015583	SMYD2
ENSSSCG00000032889	ASB12
ENSSSCG00000040053	LSMEM1
ENSSSCG00000001683	POLH
ENSSSCG00000015040	PTS
ENSSSCG00000030113	SHISA2
ENSSSCG00000038323	ACTN3
ENSSSCG00000047852	nan
ENSSSCG00000021232	SYNC
ENSSSCG00000036441	PMP2
ENSSSCG00000017448	KRT19
ENSSSCG00000024015	FADS1
ENSSSCG00000023031	TNNT2
ENSSSCG00000008768	ARAP2
ENSSSCG00000005970	SQLE
ENSSSCG00000031300	BEND5
ENSSSCG00000002029	LOC100736765
ENSSSCG00000032698	TPPP
ENSSSCG00000025810	KCNAB1
ENSSSCG00000028172	FAM78A
ENSSSCG00000024681	TECRL
ENSSSCG00000036136	BHLHE40
ENSSSCG00000004736	SPTBN5
ENSSSCG00000003160	NTF4
ENSSSCG00000030303	ACHE
ENSSSCG00000015618	LAMB3
ENSSSCG00000036569	PTP4A3
ENSSSCG00000025996	MTUS2
ENSSSCG00000028572	PER3
ENSSSCG00000003159	KCNA7
ENSSSCG00000026111	nan
ENSSSCG00000007288	MYH7B
ENSSSCG00000041958	nan
ENSSSCG00000015584	PROX1
ENSSSCG00000024061	TNNI1
ENSSSCG00000001806	FSD2
ENSSSCG00000037562	SLC2A4RG
ENSSSCG00000010493	PDLIM1
ENSSSCG00000007485	BCAS1
ENSSSCG00000031905	KCNS3
ENSSSCG00000006556	TPM3
ENSSSCG00000016338	PER2
ENSSSCG00000024954	FGF1
ENSSSCG00000000917	KERA
ENSSSCG00000003148	DBP
ENSSSCG00000034858	RAP1GAP2
ENSSSCG00000050094	nan
ENSSSCG00000046937	nan
ENSSSCG00000035299	SFRP4
ENSSSCG00000017343	GFAP
ENSSSCG00000011325	MYL3
ENSSSCG00000011646	KY
ENSSSCG00000000252	KRT8
ENSSSCG00000010947	FBP2
ENSSSCG00000003662	NT5C1A
ENSSSCG00000031053	S100A1
ENSSSCG00000033532	LOC100621492
ENSSSCG00000047759	nan
ENSSSCG00000028277	LOC100521789
ENSSSCG00000025353	TNNT1
ENSSSCG00000035965	AQP4
ENSSSCG00000044722	LOC102158612
ENSSSCG00000005928	MROH5
ENSSSCG00000048201	nan
ENSSSCG00000014437	PPARGC1B
ENSSSCG00000039710	MYL2
ENSSSCG00000029537	nan
ENSSSCG00000047720	LOC106504252
ENSSSCG00000031321	nan
ENSSSCG00000010481	LGI1
ENSSSCG00000037433	C13H3orf18
ENSSSCG00000016823	C1QTNF3
ENSSSCG00000020771	INHA
ENSSSCG00000016900	ESM1
ENSSSCG00000004094	PPP1R14C
ENSSSCG00000011441	TNNC1
ENSSSCG00000033100	nan
ENSSSCG00000037539	SORCS2
ENSSSCG00000015617	G0S2
ENSSSCG00000038607	GADL1
ENSSSCG00000039506	MYL6
ENSSSCG00000012667	IGSF1
ENSSSCG00000004218	RSPO3
ENSSSCG00000010464	PPP1R3C
ENSSSCG00000018701	MIR378-1
ENSSSCG00000030706	FAM43B
ENSSSCG00000026478	PADI2
ENSSSCG00000050060	nan
ENSSSCG00000007680	MYL10
ENSSSCG00000035760	RFLNA
ENSSSCG00000011324	nan
ENSSSCG00000043557	nan
ENSSSCG00000036157	BARX2
ENSSSCG00000040140	CD3E

## Sheet: BP uniquely upregulated DEGs
Supplementary Table 2-6: BP uniquely up-regulated DEGs
Ensembl ID	Gene name
ENSSSCG00000013916	COMP
ENSSSCG00000013934	CILP2
ENSSSCG00000001473	COL11A2
ENSSSCG00000029449	PRG4
ENSSSCG00000009216	SPP1
ENSSSCG00000007082	OTOR
ENSSSCG00000032241	GPNMB
ENSSSCG00000005938	COL22A1
ENSSSCG00000040581	CISH
ENSSSCG00000025523	COL2A1
ENSSSCG00000015353	SCIN
ENSSSCG00000006578	S100A4
ENSSSCG00000038429	nan
ENSSSCG00000012480	TNMD
ENSSSCG00000008239	CAPG
ENSSSCG00000008648	RSAD2
ENSSSCG00000022089	ADGRF2
ENSSSCG00000040145	SNAI3
ENSSSCG00000008261	HK2
ENSSSCG00000013551	C3
ENSSSCG00000007073	ISM1
ENSSSCG00000034351	B3GALT1
ENSSSCG00000040575	ISG15
ENSSSCG00000036948	IGFN1
ENSSSCG00000042227	nan
ENSSSCG00000013556	ADGRE1
ENSSSCG00000002953	C6H19orf33
ENSSSCG00000039413	SLC9A3
ENSSSCG00000009488	SLITRK5
ENSSSCG00000042043	nan
ENSSSCG00000017705	CCL5
ENSSSCG00000038186	TIGD4
ENSSSCG00000022849	IL2RA
ENSSSCG00000015037	IL18
ENSSSCG00000015302	CFAP69
ENSSSCG00000032215	FOXD3
ENSSSCG00000012960	CST6
ENSSSCG00000036201	NPR3
ENSSSCG00000017416	DHX58
ENSSSCG00000006810	KCNC4
ENSSSCG00000010532	LOXL4
ENSSSCG00000039874	CCL26
ENSSSCG00000017569	CHAD
ENSSSCG00000014796	nan
ENSSSCG00000009720	DDX60
ENSSSCG00000029484	EMB
ENSSSCG00000027628	IL6R
ENSSSCG00000036538	nan
ENSSSCG00000036246	GP91-PHOX
ENSSSCG00000037762	TBX1
ENSSSCG00000008647	CMPK2
ENSSSCG00000032777	CXCL9
ENSSSCG00000012077	MX1
ENSSSCG00000001427	C4A
ENSSSCG00000012853	IRF7
ENSSSCG00000030548	HERC5
ENSSSCG00000008737	C1QTNF7
ENSSSCG00000029783	MKX
ENSSSCG00000032474	CXCL10
ENSSSCG00000029715	OLFM1
ENSSSCG00000011358	TREX1
ENSSSCG00000028911	COLQ
ENSSSCG00000010494	SORBS1
ENSSSCG00000043319	nan
ENSSSCG00000032303	ENTPD2
ENSSSCG00000033613	FOXS1
ENSSSCG00000009881	OAS2
ENSSSCG00000012915	CLCF1
ENSSSCG00000003620	TRIM62
ENSSSCG00000034763	IRS2
ENSSSCG00000005762	KCNT1
ENSSSCG00000038255	ART1
ENSSSCG00000033518	LLGL2
ENSSSCG00000002954	SPINT2
ENSSSCG00000000997	PPP1R3G
ENSSSCG00000010055	GGT5
ENSSSCG00000024973	GBP1
ENSSSCG00000000712	ANO2
ENSSSCG00000015175	VWA5A
ENSSSCG00000044793	nan
ENSSSCG00000034802	RTP4
ENSSSCG00000005944	NDRG1
ENSSSCG00000026155	FSCN2
ENSSSCG00000037559	ACOT11
ENSSSCG00000009322	SLC46A3
ENSSSCG00000032452	WFS1
ENSSSCG00000005313	CCDC107
ENSSSCG00000004347	FBXL4
ENSSSCG00000006290	SLC19A2
ENSSSCG00000012050	RCAN1
ENSSSCG00000001063	MYLIP
ENSSSCG00000035152	TEF
ENSSSCG00000013455	IZUMO4
ENSSSCG00000021562	PLXNA4
ENSSSCG00000034973	CXCL12
ENSSSCG00000017255	ABCA5
ENSSSCG00000048933	nan
ENSSSCG00000000774	USP18
ENSSSCG00000010452	IFIT1
ENSSSCG00000000033	TSPO
ENSSSCG00000015774	TENM3
ENSSSCG00000005221	SPATA6L
ENSSSCG00000005203	IL33
ENSSSCG00000036933	NR1D1
ENSSSCG00000017886	C12H17orf100
ENSSSCG00000010791	FUOM
ENSSSCG00000015549	RNASEL
ENSSSCG00000029886	LYVE1
ENSSSCG00000028814	SOD3
ENSSSCG00000038888	C6H1orf122
ENSSSCG00000016322	ACKR3
ENSSSCG00000016111	FZD7
ENSSSCG00000006862	VCAM1
ENSSSCG00000035320	ASB14
ENSSSCG00000035297	ISG12(A)
ENSSSCG00000034990	nan
ENSSSCG00000015570	IVNS1ABP

## Sheet: BP uniquely downregulated DEGs
Supplementary Table 2-7: BP uniquely down-regulated DEGs
Ensembl ID	Gene name
ENSSSCG00000036236	ELOVL6
ENSSSCG00000018063	nan
ENSSSCG00000010831	DUSP10
ENSSSCG00000006172	PI15
ENSSSCG00000029558	EXTL1
ENSSSCG00000026686	PDZD9
ENSSSCG00000022447	F3
ENSSSCG00000016513	KIAA1549
ENSSSCG00000009914	CABP1
ENSSSCG00000005287	PSAT1
ENSSSCG00000031380	MARCKSL1
ENSSSCG00000038281	MAP3K7CL
ENSSSCG00000038801	NPNT
ENSSSCG00000036480	CTNNA3
ENSSSCG00000026457	GALNT17
ENSSSCG00000041731	nan
ENSSSCG00000033000	TIMP4
ENSSSCG00000028695	TMSB15A
ENSSSCG00000014034	N4BP3
ENSSSCG00000017109	ADAMTS16
ENSSSCG00000049430	ARMC6
ENSSSCG00000014113	HOMER1
ENSSSCG00000031518	STARD4
ENSSSCG00000006940	CCN1
ENSSSCG00000011454	SFMBT1
ENSSSCG00000021397	PODXL2
ENSSSCG00000031954	SLC39A10
ENSSSCG00000014011	RASGEF1C
ENSSSCG00000033329	SLC47A1
ENSSSCG00000013049	RCOR2
ENSSSCG00000000795	ADAMTS20
ENSSSCG00000020984	LXN
ENSSSCG00000029944	FASN
ENSSSCG00000015589	VASH2
ENSSSCG00000003928	PLK3
ENSSSCG00000002535	HSP90AA1
ENSSSCG00000015363	AGR2
ENSSSCG00000004392	AMD1
ENSSSCG00000026784	LMNB2
ENSSSCG00000047414	nan
ENSSSCG00000015140	HSPA8
ENSSSCG00000029598	FAM124A
ENSSSCG00000000138	PVALB
ENSSSCG00000043962	nan
ENSSSCG00000037646	DNAJA4
ENSSSCG00000011622	KBTBD12
ENSSSCG00000017557	WFIKKN2
ENSSSCG00000026110	SRPK2
ENSSSCG00000029651	SLN
ENSSSCG00000002389	VASH1
ENSSSCG00000007317	DLGAP4
ENSSSCG00000007748	PSPH
ENSSSCG00000011076	OTUD1
ENSSSCG00000035805	DLK1
ENSSSCG00000011000	DNAJA1
ENSSSCG00000028322	nan
ENSSSCG00000021696	NRSN1
ENSSSCG00000006312	GPA33
ENSSSCG00000038646	ENAH
ENSSSCG00000007857	ACSM3
ENSSSCG00000014076	FAM169A
ENSSSCG00000033606	LOC100155734
ENSSSCG00000011286	KLHL40
ENSSSCG00000034369	SPSB4
ENSSSCG00000015052	USP28
ENSSSCG00000028464	TMEM170A
ENSSSCG00000032193	NKAIN1
ENSSSCG00000016652	LRRN3
ENSSSCG00000039962	HSPB1
ENSSSCG00000015796	PDLIM3
ENSSSCG00000016578	FLNC
ENSSSCG00000006359	ADAMTS4
ENSSSCG00000015795	CCDC110
ENSSSCG00000011453	ITIH4
ENSSSCG00000007530	PPP1R3D
ENSSSCG00000014843	CHRDL2
ENSSSCG00000027428	ENHO
ENSSSCG00000009334	HSPH1
ENSSSCG00000029160	nan
ENSSSCG00000030681	MYBPH
ENSSSCG00000032662	FGF6
ENSSSCG00000043760	nan
ENSSSCG00000003201	ATF5
ENSSSCG00000033822	THRSP
ENSSSCG00000041218	nan
ENSSSCG00000009630	EGR3
ENSSSCG00000013377	USH1C
ENSSSCG00000010224	EGR2
ENSSSCG00000039573	SLPI
ENSSSCG00000002294	ARG2
ENSSSCG00000015340	ASNS
ENSSSCG00000015249	ADAMTS8
ENSSSCG00000021059	ADORA1
ENSSSCG00000006717	PHGDH
ENSSSCG00000040849	nan
ENSSSCG00000045624	nan
ENSSSCG00000036049	PEG10
