# Supplementary material for: Distinct Transcriptional Responses of Skeletal Muscle to Short-Term Cold Exposure in Tibetan Pigs and Bama Pigs
Source: Int J Mol Sci. 2023 Apr 18;24(8):7431. doi: 10.3390/ijms24087431 (PMC10139196; doi:10.3390/ijms24087431)
Supplement: Supplementary file 1 [file ijms-24-07431-s001.zip › Supplementary Table S2 Primers of quantitative real-time RT-PCR.xlsx]

## Sheet: Sheet1
Supplementary Table S1 Primers of quantitative real-time RT-PCR
Gene symbol	Primer sequences (5'-3')
PDK4	Forward	TGCAATGAGGGCTACAGTCG
	Reversed	CGGTCAATGATCCTCAGGGG
MLYCD	Forward	GGTGTTCTCAAGCCTGTCG
	Reversed	GGCATCGGTGAACAGTTCG
CPT1A	Forward	CTCTATTACGACGGCAGGCT
	Reversed	ATACCCTTGCTCCGTTTCGT
UCP3	Forward	AGTGGATGTGGTGAAGACCC
	Reversed	TTCCCAAGCGCAAAAAGGAAG
GLUL	Forward	TGAAGGCTCCAACAGTGACA
	Reversed	GCAGGCTTTCGGTTGTACTT
LIPE	Forward	GCCTTTGAAATGCCACTGAC
	Reversed	ACGCAGGTCATAGGAGATGAG
SCD	Forward	CTTCCTGATCATTGCCAACA
	Reversed	GCAAACCACCCTTCTCTTTG
CPT1B	Forward	CTTCTTCCGCCAAACCTTGA
	Reversed	AGATGTCTGGAAACTGTAGAGCA
CD36	Forward	CCTTCACTGTTCTCAATCTGGC
	Reversed	CCGGATAGCCCCACAATAGT
FITM2	Forward	ATCTCAGCAACAAACGCAAC
	Reversed	TAGTTGGTGAGGGCGATGAA
PLIN2	Forward	CAGAACATCCACGATCAGGC
	Reversed	TTGAGGGGCGTGTTGTTAAC
LCLAT1	Forward	GATGCGTTTGTTCCTGGAGAA
	Reversed	CCAACCAAATCCAGGAACACT
LPIN1	Forward	CACAGTGAATCTTCGGACGC
	Reversed	GCTCTTCGATGGTGGGTAGA
SLN	Forward	GCTGTGTCTCAACTTCACCG
	Reversed	GCATCCCATGACAGCAATG
SERCA1a	Forward	GCCGGTGAAGGAGAGGATT
	Reversed	ATGTCAGGTCCGTCTCGTAC
SERCA2a	Forward	ATGTTTGTGAAGGGTGCTCC
	Reversed	CATCGGGTTGTCATGAGTGG
DIO2	Forward	GCATGTCTCCAATCCCGAAG
	Reversed	AGCTGGCTAGTGAAAGGAGG
FBXO32	Forward	GTTGCGGCCAAGAAGAGAAA
	Reversed	AATGGCAGTCGAGAAGTCCA
UCHL1	Forward	TGAAGCAGACCATTGGCAAC
	Reversed	TTTGTCATCTACCCGGCACT
CA3	Forward	CCACTGGCATGAACTTTACCC
	Reversed	GGTCTTCCCATTGTTCAGGA
FOS	Forward	ACTTCATCCCAACGGTGACT
	Reversed	GACAACTGTTCCACCTTGCC
EGR1	Forward	CTTCCAGGTCCCCATGATCC
	Reversed	GGACTGGTAGGTGGTGTTGA
GPCPD1	Forward	AGTTCAAGTGCAGGCATTCC
	Reversed	CCTGAACGACATGCTCACTG
FABP3	Forward	CTAGTGGACAGCAAGAATTTCGA
	Reversed	GCTCTTGAAGGTGCTTTGTGTT
CISH	Forward	CTGTTCACACTGTCGGTCAA
	Reversed	TGTCACTTCGGGTATCTGCA
RSAD2	Forward	CCTGCCTGAAGAACAAGACC
	Reversed	GTGTTCTTCTTGGCCGACAC
HK2	Forward	GGGTGCTTTGGGTGAGAGTA
	Reversed	TGGATGCAAGGGAATGAGAAG
IGFN1	Forward	CGGAAGGACTATGAGCAGATCT
	Reversed	GGTCAAACGTTGCGATTCCT
IL6R	Forward	TTTCAGAACAGTCCCGTGGA
	Reversed	AAATGTTTGGGGTGTGCTGG
OAS2	Forward	GCTCACAAGGAAGCTGGAAG
	Reversed	GAGGTCTCGATAGGTCCAGG
CXCL12	Forward	ATGGGTGTCAAGGTCCTCG
	Reversed	CAGTTCGGAGTGTTGAGGATC
IVNSABP	Forward	TGTCAAGCAGGTTTGTGGTG
	Reversed	TCTTCAAGCATTACCTCCAGC
CKM	Forward	TCTGAAGAGCATGACCGAGC
	Reversed	CTCCTCGTTCACCCACACTA
CKMT2	Forward	GCCGTTACTACAAGCTGTCC
	Reversed	AATTGTGCCAGATTCCCCTG
MYH1	Forward	GAGGAAGCGGAGGAACAATCCA
	Reversed	GACCTGGGACTCAGCAATGTCA
MYH2	Forward	CGCGTTGAGGAAGAAGCAC
	Reversed	GCGGCACATCTTCTCTAGGT
MYH4	Forward	CGCCAAGCTACTGAGGCAATAA
	Reversed	GTTCCACCATGGCCAGTTGTTC
MYH7	Forward	TACTTTGCTGTCATTGCCGC
	Reversed	GCGGGAGGAGTTGTCATTCC
TNNT1	Forward	CAGGGCGTGAGATGAAACAG
	Reversed	TGTACAGCACGTTGATCTCG
TNNC1	Forward	GCACAGTGGACTTCGATGAG
	Reversed	GCTCCTCGATGTCATCCTCT
TNNC2	Forward	GAGCTGGGCAAAGTGATGAG
	Reversed	ACATGCGGAAGAGGTCAGAA
GAPDH	Forward	GTCGGAGTGAACGGATTTGG
	Reversed	AGTGGAGGTCAATGAAGGGG
